# Supplementary material
Source: PubMed Central journal article supplement (PMC3155423)
Supplement: NIHMS314274-supplement-1_si_001.pdf [file NIHMS314274-supplement-1_si_001.pdf]

## **N-Heterocyclic Carbene and Brønsted Acid Cooperative Catalysis: Asymmetric Synthesis of *trans*- $\gamma$ -Lactams**

Xiaodan Zhao, Daniel A. DiRocco, and Tomislav Rovis\*

*Department of Chemistry, Colorado State University, Fort Collins, CO 80523, United States*

[rovis@lamar.colostate.edu](mailto:rovis@lamar.colostate.edu)

### **Table of Contents:**

---

|                                                                                                         |     |
|---------------------------------------------------------------------------------------------------------|-----|
| 1. General considerations                                                                               | S2  |
| 2. Experimental procedures                                                                              | S4  |
| 2.1 <i>Synthesis of Triazolium Salts</i>                                                                | S4  |
| 2.2 <i>Synthesis of Imines</i>                                                                          | S6  |
| 2.3 <i>Catalyst Screen</i>                                                                              | S6  |
| 2.4 <i>Synthesis of <i>trans</i>-<math>\gamma</math>-Lactam Using Chiral Carbenes and Achiral Bases</i> | S7  |
| 2.5 <i>Synthesis of <i>trans</i>-<math>\gamma</math>-Lactam Using Achiral Carbene and Chiral Base</i>   | S8  |
| 3. Analytical data                                                                                      | S8  |
| 4. Absolute configuration assignment                                                                    | S20 |
| 5. NMR spectra for new compounds                                                                        | S29 |
| 6. HPLC spectra for products                                                                            | S59 |

---

## 1. General considerations

Commercial reagents were purchased from Sigma-Aldrich or Alfa Aesar and used without further purification unless otherwise indicated. KHMDS refers to potassium hexamethyldisilazide. All catalytic reactions were carried out under Ar with oven-dried glassware. Dichloromethane was degassed with argon and passed through two columns of neutral alumina. Acetonitrile and propionitrile were distilled from CaH<sub>2</sub> prior to use. Ethyl *trans*-4-oxo-2-butenate (**2a**) was distilled and stored in the refrigerator before use. Thin layer chromatography was performed on 0.25 mm silica gel 60-F plates from Silicycle Inc. Column chromatography was performed on silica gel 60 (230-400 mesh) from Silicycle Inc.

<sup>1</sup>H, <sup>13</sup>C{<sup>1</sup>H}, and <sup>19</sup>F NMR spectra were recorded on a Varian 300 or 400 spectrometer at ambient temperature. All NMR spectra are referenced to TMS or the residual solvent signal. Data for <sup>1</sup>H NMR are reported as follows: chemical shift (δ ppm), multiplicity (s = singlet, d = doublet, t = triplet, q = quartet, m = multiplet, br = broad), coupling constant (Hz), integration. Data for <sup>13</sup>C{<sup>1</sup>H} NMR are reported as follows: chemical shift (δ ppm). Data for <sup>19</sup>F NMR are reported as follows: chemical shift (δ ppm), multiplicity (s = singlet, d = doublet, t = triplet, q = quartet, m = multiplet, br = broad), coupling constant (Hz), integration.

High resolution mass spectra (HRMS) were recorded on an Agilent Technologies 6210 Time of Flight LC/MS. HPLC spectra were obtained on an Agilent 1100 series system. Optical rotation was obtained with an Autopol-III automatic polarimeter.

All imines were synthesized from the corresponding aldehydes and amines. The triazolium salts **C1-C6** were prepared according to our previous procedure.<sup>1</sup> Enals **2b**<sup>2</sup> and **2d**<sup>3</sup> were synthesized according to known procedures. Acids **AA3** and **AA4** were prepared from amino acids by known procedures.<sup>4</sup> Sodium salts **A1-A4** were easily prepared from the corresponding acids **AA1-AA4** with stoichiometric sodium hydroxide, respectively. **AA1** and **AA2** are commercially available. Imines **2f**<sup>5</sup> and **2g**<sup>6</sup>, azoliums **C1**,<sup>7</sup> **C2**,<sup>8</sup> **C5**<sup>8</sup> and **C6**,<sup>1</sup> enals **2b**<sup>2</sup> and **2d**<sup>3</sup>, acids **AA3**<sup>4</sup> and **AA4**<sup>9</sup> are known compounds and were identified by NMR comparison to reported data.

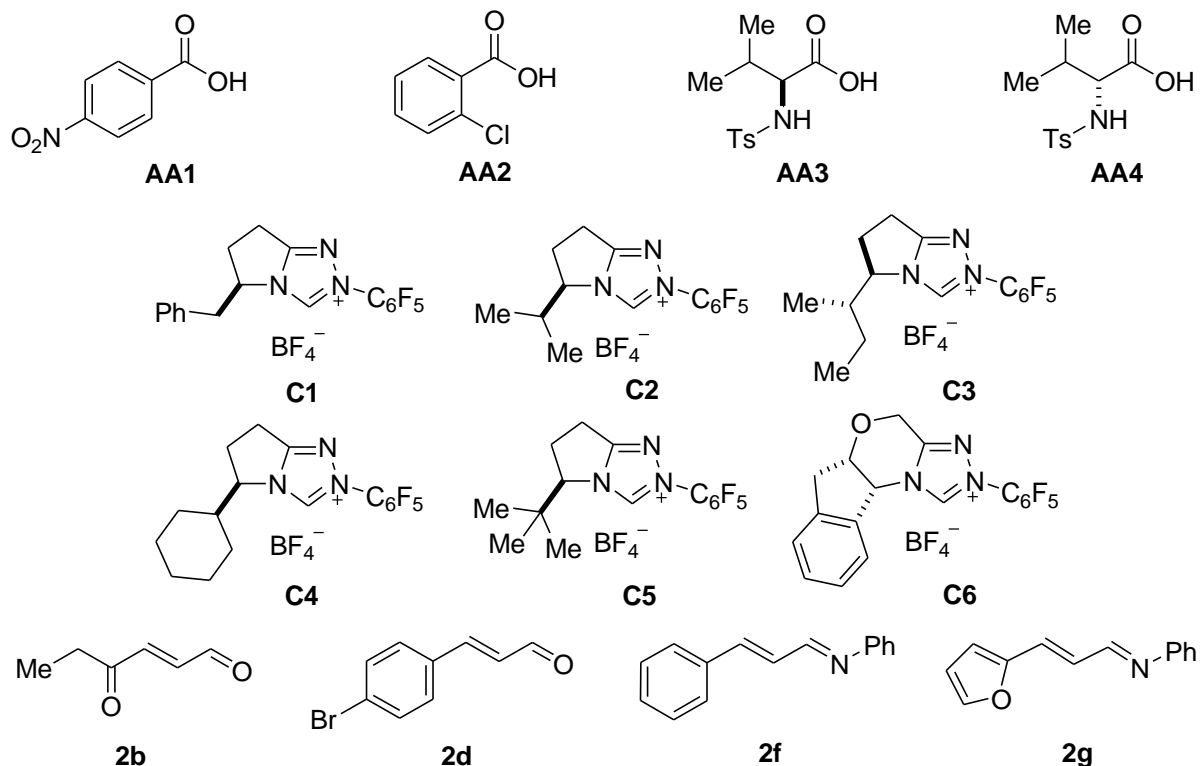

References:

- (1) Kerr, M. S.; Read de Alaniz, J.; Rovis, T. *J. Org. Chem.* **2005**, *70*, 5725.
- (2) Moreira, J. A.; Millar, J. G. *J. Chem. Ecol.* **2005**, *31*, 965.
- (3) Avery, T. D.; Caiazza, D.; Culbert, J. A.; Taylor, D. K.; Tiekink, R. T. *J. Org. Chem.* **2005**, *70*, 8344.
- (4) Västilä, P.; Pastor, I. M.; Adolfsson, H. *J. Org. Chem.* **2005**, *70*, 2921.
- (5) Oberg, K. M.; Rovis, T. *J. Am. Chem. Soc.* **2011**, *133*, 4785.
- (6) Lovel, I.; Golomba, L.; Popelis, J.; Gaukhman, A.; Lukevics, E. *Chem. Heterocycl. Comp.* **2000**, *36*, 264.
- (7) Liu, Q.; Perreault, S.; Rovis, T. *J. Am. Chem. Soc.* **2008**, *130*, 14066.
- (8) DiRocco, D. A.; Oberg, K. M.; Dalton, D. M.; Rovis, T. *J. Am. Chem. Soc.* **2009**, *131*, 10872.
- (9) Shultz, C. S.; Dreher, S. D.; Ikemoto, N.; Williams, J. M.; Grabowski, E. J. J.; Krska, S. W.; Sun, Y.; Dormer, P. G.; DiMichele, L. *Org. Lett.* **2005**, *7*, 3405.

## 2. Experimental procedures

### 2.1. Synthesis of Triazolium Salts

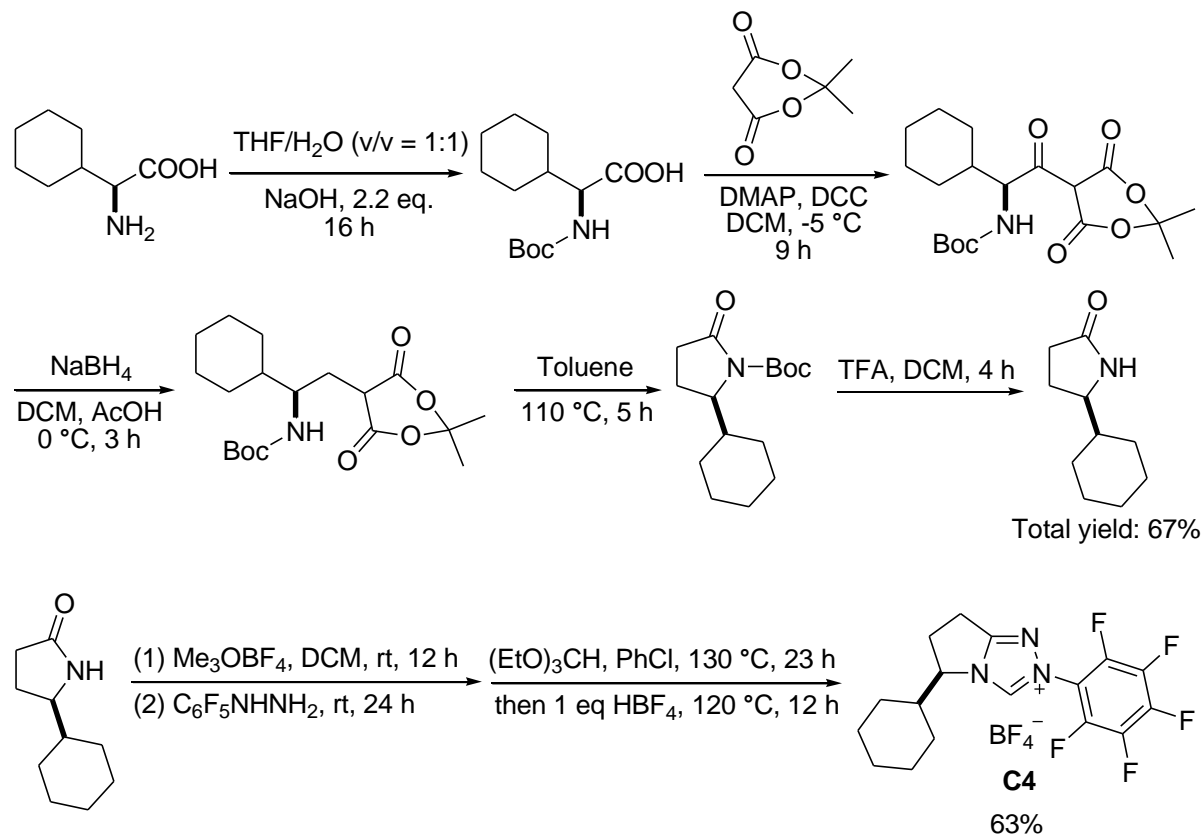

Triazolium salt **C4**: Synthesized by a modification to the known procedure.<sup>1</sup> In a 20-mL vial was added (R)-5-cyclohexylpyrrolidin-2-one (0.5 g, 2.99 mmol) and dichloromethane (15 mL). Subsequently, trimethyloxonium tetrafluoroborate (0.443 g, 2.99 mmol) was added. The vial was sealed with white cap and the mixture was stirred at room temperature for 12 h, then, pentafluorophenyl hydrazine (0.593 g, 2.99 mmol) was added. The resulting solution was stirred at room temperature for 24 hours and then transferred to a 100 mL round-bottomed flask. All volatiles were removed under reduced pressure, and triethyl orthoformate (4 mL, 24.0 mmol) and chlorobenzene (20 mL) were subsequently added to the flask, and the solution was heated at 130 °C for 23 h. The resulting dark brown solution was concentrated. Chlorobenzene (20 mL) and HBF<sub>4</sub> (0.41 mL, 2.99 mmol) were added to the residue, and the resulting solution was stirred at 120 °C for 12 h. The dark solution was cooled to room temperature, and concentrated under reduced pressure. The residue was purified by silica gel column chromatography (eluent: DCM/acetone = 15/1 to 10/1, v/v) to afford a brown solid. The

solid was dissolved into dichloromethane (0.5 mL) in a vial, and ether was added in order to precipitate the azolium salt. The solution was poured out, and the remaining solid was washed with ether (5 mL x 3) to give a white solid **C4** (0.834 g, 63%). Triazolium salt **C4**: White solid. M.p.: 180-181 °C.  $[\alpha]_D^{20} = +43.6^\circ$  (c = 0.005 g/mL, MeOH). <sup>1</sup>H-NMR (300 MHz, CDCl<sub>3</sub>) δ 10.37 (s, 1H), 5.00 (td, J = 5.9, 8.1 Hz, 1H), 3.51-3.36 (m, 2H), 3.14-3.04 (m, 1H), 2.91-2.84 (m, 1H), 2.21-2.13 (m, 1H), 1.94-1.91 (m, 1H), 1.82-1.79 (m, 2H), 1.75-1.67 (m, 2H), 1.38-1.17 (m, 4H). <sup>13</sup>C{<sup>1</sup>H} NMR (101 MHz, CDCl<sub>3</sub>) δ 164.2, 143.5, 67.0, 40.3, 29.9, 28.5, 27.3, 25.6, 25.4, 25.3, 21.4. HRMS (ESI) *m/z* calc'd for C<sub>17</sub>H<sub>17</sub>F<sub>5</sub>N<sub>3</sub> [M-BF<sub>4</sub>]<sup>+</sup>: 358.1337; found: 358.1355.

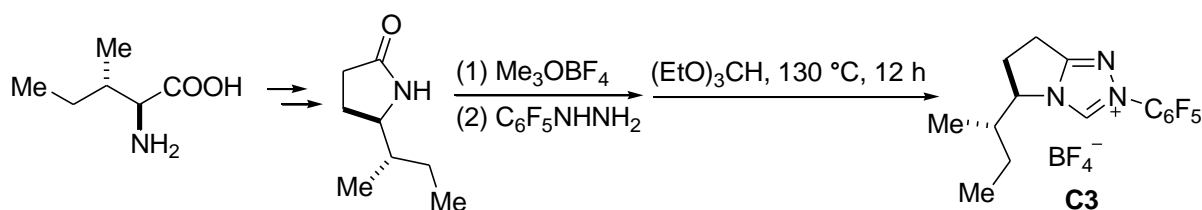

Triazolium salt **C3**: Synthesized according to a modification to the known procedure.<sup>1</sup> To a flame-dried flask with magnetic stir bar was added (R)-5-((S)-*sec*-butyl)pyrrolidin-2-one (1.0 g, 7.08 mmol). The flask was then evacuated and back-filled with argon. Dichloromethane (35 mL) and trimethyloxonium tetrafluoroborate (1.05 g, 7.08 mmol) were then added via powder funnel. The heterogeneous mixture was stirred at room temperature until the reaction was homogeneous (about 6 hours). Pentafluorophenyl hydrazine (1.40 g, 7.08 mmol) was added in one portion and the mixture was stirred for 18 hours at which point dichloromethane was removed *in vacuo*. Triethylorthoformate (20.0 mL) was then added and the solution transferred to a 75 mL pressure flask and heated in a 130 °C oil bath for 12 h. The resulting dark brown solution was then concentrated *in vacuo* to leave a semi-solid which was then triturated with diethyl ether, filtered and washed with diethyl ether. The resulting off-white powder was dried under vacuum for 12 h to give triazolium salt **C3** (1.04 g, 35%) as an off-white solid. Triazolium salt **C3**: White solid.  $[\alpha]_D^{20} = +35.6^\circ$  (c = 0.00458 g/mL, MeOH). M.p.: 176-178 °C. <sup>1</sup>H-NMR (400 MHz, CDCl<sub>3</sub>) δ 10.41 (s, 1H), 5.20-5.15 (m, 2H), 3.46 (ddd, J = 4.0, 6.6, 8.5 Hz, 2H), 3.06 (dtd, J = 6.5, 8.5, 13.5 Hz, 1H), 2.89-2.82 (m, 1H), 2.46-2.36 (m, 1H), 1.71-1.60 (m, 1H), 1.46-1.35 (m, 1H), 1.03-0.99 (m, 6H). <sup>13</sup>C{<sup>1</sup>H} NMR

(101 MHz, CDCl<sub>3</sub>)  $\delta$  164.2, 143.4, 66.2, 36.9, 28.5, 25.3, 21.6, 12.5, 10.6. HRMS (ESI)  $m/z$  calc'd for C<sub>15</sub>H<sub>15</sub>F<sub>5</sub>N<sub>3</sub> [M-BF<sub>4</sub>]<sup>+</sup>: 332.1181; found: 332.1171.

## 2.2. Synthesis of Imines

**General procedure:** To a 100 mL round-bottomed flask was added  $\alpha,\beta$ -unsaturated aldehyde, amine (1 eq.) and 3A molecular sieves. The mixture was stirred at room temperature for 12 h. Then, the mixture was filtered and concentrated to give the corresponding imine. The generated imine is typically pure. If necessary, it can be purified by recrystallization from toluene or hexanes.

## 2.3. Catalyst Screen

Achiral catalysts bearing varying *N*-aryl substituents were examined under the optimized reaction conditions and the results are reported below. Chiral azolium catalyst bearing an *N*-phenyl group was also examined.

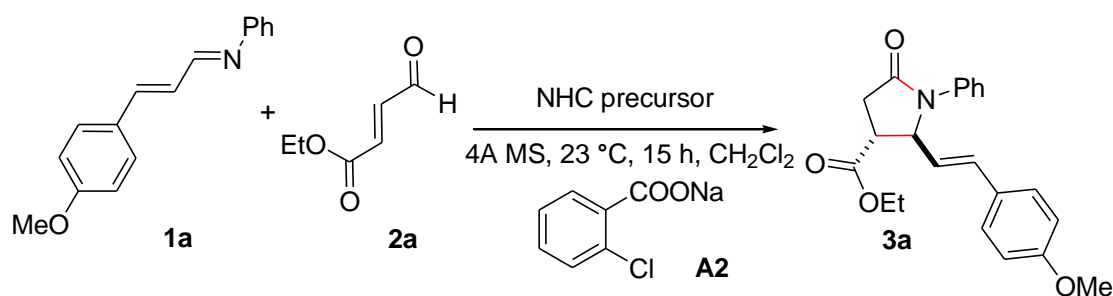

| entry | NHC precursor | yield (%) <sup>a</sup> | dr <sup>b</sup> | ee of trans/cis (%) <sup>c</sup> |
|-------|---------------|------------------------|-----------------|----------------------------------|
| 1     | <b>C7</b>     | >99                    | 3.5/1           | ---                              |
| 2     | <b>C8</b>     | 84                     | 2/1             | ---                              |
| 3     | <b>C9</b>     | 20                     | 3/1             | ---                              |
| 4     | <b>C10</b>    | 14                     | 2.5/1           | ---                              |
| 5     | <b>C11</b>    | 13                     | 2.3/1           | -55/-66                          |

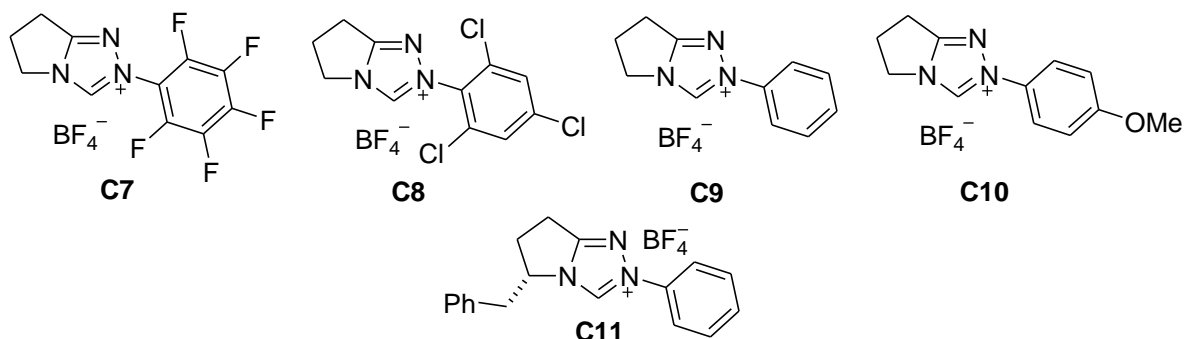

Conditions: **2a**, 0.2 mmol; **1a**, 0.1 mmol; **A2**, 20 mol%; NHC precursor, 20 mol%; CH<sub>2</sub>Cl<sub>2</sub>, 1 mL; 4A MS under Ar. <sup>a</sup> NMR yields of *trans* and *cis*-diastereomers (internal standard). <sup>b</sup> The ratio of *trans*/*cis* determined by <sup>1</sup>H NMR. <sup>c</sup> Determined by chiral HPLC.

### 2.3. Synthesis of *trans*- $\gamma$ -Lactam Using Chiral Carbenes and Achiral Bases

**General procedure for cyclization of *N*-(4-methoxycinnamylidene)aniline (**1a**) with ethyl *trans*-4-oxo-2-butenoate (**2a**):** In a 10 mL tube was subsequently added *N*-(4-methoxycinnamylidene)aniline (**1a**) (23.7 mg, 0.1 mmol), triazolium salt **C4** (8.9 mg, 0.02 mmol, 20 mol%) and sodium *o*-chlorobenzoate (3.6 mg, 0.02 mmol, 20 mol%). The tube was moved into glovebox. Then, ethyl *trans*-4-oxo-2-butenoate (**2a**) (25.6 mg, 0.2 mmol) and 4A molecular sieves (50 mg) were added. The tube was sealed with a septum and removed from the glovebox. Acrylonitrile (1 mL) was added, and the mixture was stirred at 0 °C for 15 h, then filtered through Celite and concentrated. The resulting residue was analyzed by proton NMR using 1,3,5-trimethoxybenzene (16.8 mg, 0.1 mmol) as an internal standard to determine NMR yield (*trans* and *cis* isomers, 96%) and the diastereoselectivity (*trans/cis* = 11/1).

In order to obtain isolated yield, the NMR solution was diluted with 40 mL EtOAc and washed with 1M HCl (5 mL), water (5 mL), NaHCO<sub>3</sub> (sat., 5 mL) and brine (10 mL). The organic phase was dried over Na<sub>2</sub>SO<sub>4</sub>, concentrated *in vacuo* and the resulting residue was purified by silica gel column chromatography (eluent: hexanes/EtOAc = 3:1 to 2/1, v/v) to afford the *trans*- $\gamma$ -lactam product **3a** as a yellow viscous oil (34.0 mg, 93% yield and 91% ee for *trans*-lactam).

**Experimental procedure for synthesis of lactam **3m** with ethyl *trans*-4-oxo-2-butenoate (**2a**) and aniline in one pot:** In a 10 mL tube was subsequently added aniline (**1a**) (9.3 mg, 0.1 mmol), triazolium salt **C4** (8.9 mg, 0.02 mmol, 20 mol%) and sodium *o*-chlorobenzoate (3.6 mg, 0.02 mmol, 20 mol%). The tube was moved into a glovebox, then, ethyl *trans*-4-oxo-2-butenoate (**2a**) (38.4 mg, 0.3 mmol) and 4A molecular sieves (50 mg) were added. The tube was sealed with a septum and removed from glovebox. Acrylonitrile (0.8 mL) was added, and the mixture was stirred at 0 °C for 15 h, then filtered through Celite and concentrated. The resulting residue was analyzed to determine the diastereoselectivity (*trans/cis* = 8/1). To isolate the product, the NMR solution was diluted with 40 mL EtOAc and washed with 1M HCl (5 mL), water (5 mL), NaHCO<sub>3</sub> (sat., 5 mL) and brine (10 mL). The organic phase was dried over Na<sub>2</sub>SO<sub>4</sub>, concentrated *in vacuo* and the resulting residue

was purified by silica gel column chromatography (eluent: hexanes/EtOAc = 3:1, v/v) to afford the *trans*- $\gamma$ -lactam product **3m** as a yellow viscous oil (28.1 mg, 85% yield and 92% ee for *trans*-lactam).

#### 2.4. Synthesis of *trans*- $\gamma$ -Lactam Using Achiral Carbene and Chiral Base

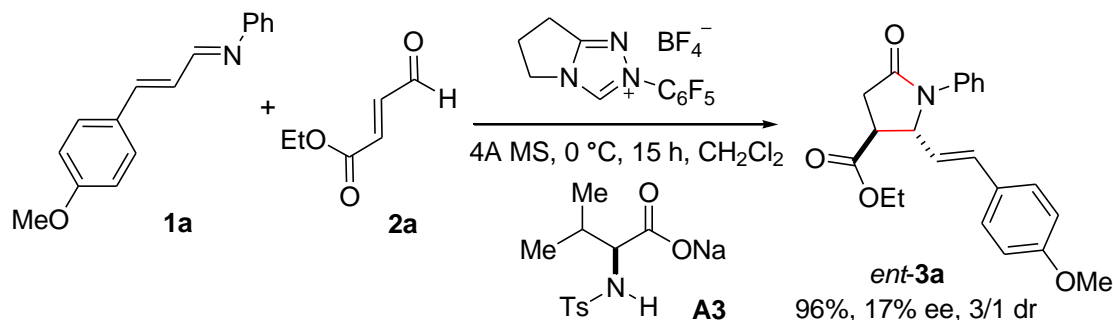

In a 10 mL tube was subsequently added *N*-(4-methoxycinnamylidene)aniline (**1a**) (23.7 mg, 0.1 mmol), 2-pentafluorophenyl-6,7-dihydro-5H-pyrrolo[2,1-*c*][1,2,4]triazol-2-ium tetrafluoroborate (7.5 mg, 0.02 mmol, 20 mol%) and base **A3** (2.9 mg, 0.02 mmol, 20 mol%). The tube was moved into glovebox. Then, ethyl *trans*-4-oxo-2-butenoate (**2a**) (25.6 mg, 0.2 mmol) and 4A molecular sieves (50 mg) were added. The tube was sealed with a septum and removed from glovebox. Dichloromethane (1 mL) was added. The mixture was stirred at 0 °C for 15 h, then filtered through Celite and concentrated to give a residue. It was analyzed by proton NMR to determine the diastereoselectivity (*trans/cis* = 3/1). The NMR solution was concentrated and directly purified by silica gel column chromatography (eluent: hexanes/EtOAc = 3:1 to 2/1, v/v) to afford the *trans*- $\gamma$ -lactam product *ent*-**3a** as a yellow viscous oil (35.0 mg, 96% yield and 17% ee for *trans*-lactam). For HPLC trace, see page S76.

### 3. Analytical data

#### Starting material imines

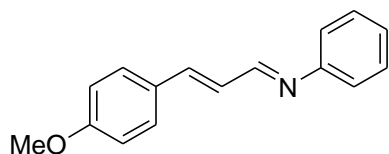



***N*-(4-Methoxycinnamylidene)aniline (1a)**: Prepared by general procedure. Yellow solid.  $^1\text{H-NMR}$  (300 MHz,  $\text{CDCl}_3$ )  $\delta$  78.24 (d,  $J = 8.4$  Hz, 1H), 7.49 (d,  $J = 8.7$  Hz, 2H), 7.38 (t,  $J = 7.7$  Hz, 2H), 7.24-6.91 (m, 7H), 3.84 (s, 3H).  $^{13}\text{C}\{^1\text{H}\}$  NMR (75 MHz,  $\text{CDCl}_3$ )  $\delta$  161.8, 160.8, 151.8, 143.7, 129.1, 129.0, 128.3, 126.4, 125.8, 120.8, 114.3, 55.3. HRMS (ESI)  $m/z$  calc'd for  $\text{C}_{16}\text{H}_{16}\text{NO}$   $[\text{M}+\text{H}]^+$ : 238.1226; found: 238.1200.

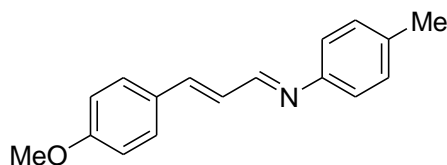

***N*-(4-Methoxycinnamylidene)-4-methylaniline**: Prepared by general procedure. Yellow solid.  $^1\text{H-NMR}$  (400 MHz,  $\text{CDCl}_3$ )  $\delta$  8.23 (d,  $J = 8.5$  Hz, 1H), 7.45 (d,  $J = 8.7$  Hz, 2H), 7.16 (d,  $J = 8.4$  Hz, 2H), 7.09-7.04 (m, 3H), 6.97 (dd,  $J = 8.4, 15.8$  Hz, 1H), 6.89 (d,  $J = 8.7$  Hz, 2H), 3.81 (s, 3H), 2.34 (s, 3H).  $^{13}\text{C}\{^1\text{H}\}$  NMR (101 MHz,  $\text{CDCl}_3$ )  $\delta$  160.9, 160.7, 149.2, 143.2, 135.7, 129.7, 128.9, 128.4, 126.5, 120.7, 114.3, 55.3, 20.9. HRMS (ESI)  $m/z$  calc'd for  $\text{C}_{17}\text{H}_{18}\text{NO}$   $[\text{M}+\text{H}]^+$ : 252.1383; found: 252.1388.

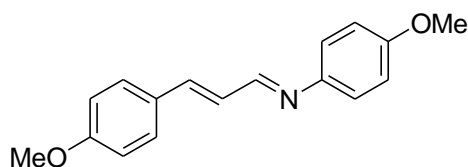

***N*-(4-Methoxycinnamylidene)-4-methoxyaniline**: Prepared by general procedure. Yellow solid.  $^1\text{H-NMR}$  (400 MHz,  $\text{CDCl}_3$ )  $\delta$  8.24 (d,  $J = 8.4$  Hz, 1H), 7.45 (d,  $J = 8.8$  Hz, 2H), 7.16 (d,  $J = 8.9$  Hz, 2H), 7.04 (d,  $J = 15.9$  Hz, 1H), 6.96 (dd,  $J = 8.5, 15.9$  Hz, 1H), 6.90-6.88 (m, 4H), 3.82 (s, 3H), 3.80 (s, 3H).  $^{13}\text{C}\{^1\text{H}\}$  NMR (101 MHz,  $\text{CDCl}_3$ )  $\delta$  160.6, 159.8, 158.1, 144.7, 142.7, 128.8, 128.5, 126.6, 122.1, 114.4, 114.3, 55.4, 55.3. HRMS (ESI)  $m/z$  calc'd for  $\text{C}_{17}\text{H}_{18}\text{NO}_2$   $[\text{M}+\text{H}]^+$ : 268.1338; found: 268.1340.

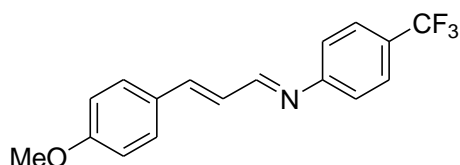

***N*-(4-Methoxycinnamylidene)-4-trifluoromethylaniline**: Prepared by general procedure. Yellow solid.  $^1\text{H-NMR}$  (400 MHz,  $\text{CDCl}_3$ )  $\delta$  8.17 (d,  $J = 8.9$  Hz, 1H), 7.59 (d,  $J = 8.3$  Hz, 2H), 7.47 (d,  $J = 8.7$  Hz, 2H), 7.24-7.11 (m, 3H), 6.96 (dd,  $J = 8.9, 15.9$  Hz, 1H), 6.91 (d,  $J = 8.7$  Hz, 2H), 3.82 (s, 3H).  $^{13}\text{C}\{^1\text{H}\}$  NMR (101 MHz,  $\text{CDCl}_3$ )  $\delta$  163.4, 161.1, 155.0, 145.2,

129.2, 128.0, 126.3 (q,  $J = 3.8$  Hz), 125.9, 120.9, 114.4, 55.3. HRMS (ESI)  $m/z$  calc'd for  $C_{17}H_{15}F_3NO$   $[M+H]^+$ : 306.1100; found: 306.1108.

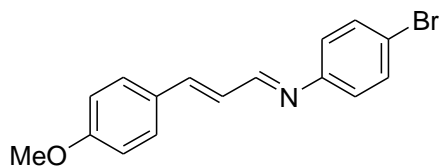

***N*-(4-Methoxycinnamylidene)-4-bromoaniline**: Prepared by general procedure. Yellow solid.  $^1H$ -NMR (300 MHz,  $CDCl_3$ )  $\delta$  8.20 (d,  $J = 8.8$  Hz, 1H), 7.50-7.46 (m, 4H), 7.12 (d,  $J = 15.9$  Hz, 1H), 7.04 (d,  $J = 8.6$  Hz, 2H), 7.01-6.91 (m, 3H), 3.85 (s, 3H).  $^{13}C\{^1H\}$  NMR (75 MHz,  $CDCl_3$ )  $\delta$  162.2, 160.9, 150.8, 144.4, 132.1, 129.1, 128.2, 126.1, 122.5, 119.1, 114.4, 55.3. HRMS (ESI)  $m/z$  calc'd for  $C_{16}H_{15}BrNO$   $[M+H]^+$ : 316.0332; found: 316.0333.

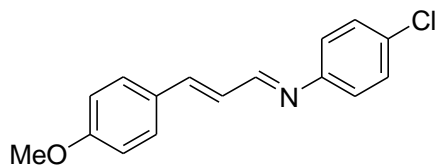

***N*-(4-Methoxycinnamylidene)-4-chloroaniline**: Prepared by general procedure. Yellow solid.  $^1H$ -NMR (400 MHz,  $CDCl_3$ )  $\delta$  8.17 (d,  $J = 8.8$  Hz, 1H), 7.45 (d,  $J = 8.8$  Hz, 2H), 7.30 (d,  $J = 8.7$  Hz, 2H), 7.11-7.07 (m, 3H), 6.94 (dd,  $J = 8.8, 15.9$  Hz, 1H), 6.89 (d,  $J = 8.8$  Hz, 2H), 3.81 (s, 3H).  $^{13}C\{^1H\}$  NMR (101 MHz,  $CDCl_3$ )  $\delta$  162.1, 160.9, 150.3, 144.3, 131.2, 129.1, 129.0, 128.2, 126.1, 122.1, 114.3, 55.3. HRMS (ESI)  $m/z$  calc'd for  $C_{16}H_{15}ClNO$   $[M+H]^+$ : 272.0837; found: 272.0833.

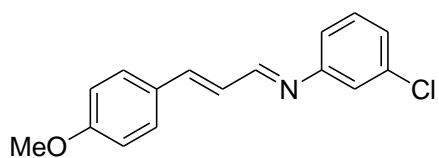

***N*-(4-Methoxycinnamylidene)-3-chloroaniline**: Prepared by general procedure. Yellow solid.  $^1H$ -NMR (400 MHz,  $CDCl_3$ )  $\delta$  8.17 (d,  $J = 8.9$  Hz, 1H), 7.47 (d,  $J = 8.6$  Hz, 2H), 7.26 (dd,  $J = 5.9, 13.8$  Hz, 1H), 7.16-7.08 (m, 3H), 7.02 (d,  $J = 7.9$  Hz, 1H), 6.97-6.89 (m, 3H), 3.82 (s, 3H).  $^{13}C\{^1H\}$  NMR (101 MHz,  $CDCl_3$ )  $\delta$  162.8, 161.0, 153.2, 144.7, 134.6, 130.1, 129.1, 128.1, 126.0, 125.6, 120.7, 119.5, 114.4, 55.3. HRMS (ESI)  $m/z$  calc'd for  $C_{16}H_{15}ClNO$   $[M+H]^+$ : 272.0842; found: 272.0843.

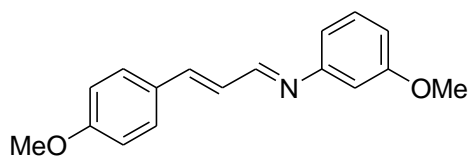

***N*-(4-Methoxycinnamylidene)-3-methoxyaniline**: Prepared by general procedure. Yellow solid.  $^1\text{H-NMR}$  (400 MHz,  $\text{CDCl}_3$ )  $\delta$  8.20 (d,  $J = 8.7$  Hz, 1H), 7.45 (d,  $J = 8.7$  Hz, 2H), 7.25 (t,  $J = 8.0$  Hz, 1H), 7.06 (d,  $J = 15.9$  Hz, 1H), 6.96 (dd,  $J = 8.7, 15.9$  Hz, 1H), 6.89 (d,  $J = 8.8$  Hz, 2H), 6.76-6.72 (m, 3H), 3.80 (s, 6H).  $^{13}\text{C}\{^1\text{H}\}$  NMR (101 MHz,  $\text{CDCl}_3$ )  $\delta$  161.8, 160.7, 160.2, 153.2, 143.8, 129.7, 128.9, 128.2, 126.2, 114.2, 112.8, 111.6, 106.6, 55.2, 55.1. HRMS (ESI)  $m/z$  calc'd for  $\text{C}_{17}\text{H}_{18}\text{NO}_2$   $[\text{M}+\text{H}]^+$ : 268.1338; found: 268.1336.

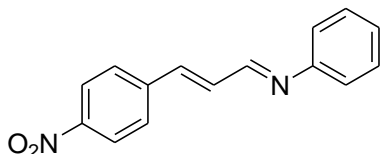

***N*-(4-Nitrocinnamylidene)aniline**: Prepared by a modification to general procedure. Dichloromethane and toluene were used as mixed solvents instead of toluene because of the solubility of imine in toluene. Yellow solid.  $^1\text{H-NMR}$  (400 MHz,  $\text{CDCl}_3$ )  $\delta$  8.29 (d,  $J = 7.4$  Hz, 1H), 8.23 (d,  $J = 8.8$  Hz, 2H), 7.65 (d,  $J = 8.7$  Hz, 2H), 7.38 (t,  $J = 7.8$  Hz, 2H), 7.26-7.22 (m, 1H), 7.20-7.14 (m, 4H).  $^{13}\text{C}\{^1\text{H}\}$  NMR (101 MHz,  $\text{CDCl}_3$ )  $\delta$  160.2, 151.1, 141.7, 140.4, 132.5, 129.2, 127.9, 126.7, 124.2, 120.9. HRMS (ESI)  $m/z$  calc'd for  $\text{C}_{15}\text{H}_{13}\text{N}_2\text{O}_2$   $[\text{M}+\text{H}]^+$ : 253.0972; found: 253.0981.

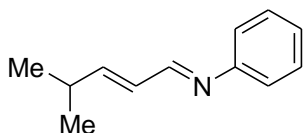

***N*-(4-Methylpent-2-enylidene)aniline**: Prepared by general procedure. Yellow liquid.  $^1\text{H-NMR}$  (400 MHz,  $\text{CDCl}_3$ )  $\delta$  8.04 (dd,  $J = 3.0, 5.3$  Hz, 1H), 7.35-7.31 (m, 2H), 7.17 (t,  $J = 7.4$  Hz, 1H), 7.09 (d,  $J = 7.2$  Hz, 2H), 6.39-6.37 (m, 2H), 2.58-2.49 (m, 1H), 1.09 (d,  $J = 6.8$  Hz, 6H).  $^{13}\text{C}\{^1\text{H}\}$  NMR (101 MHz,  $\text{CDCl}_3$ )  $\delta$  162.4, 155.1, 151.9, 129.0, 128.4, 125.6, 120.7, 31.4, 21.5. HRMS (ESI)  $m/z$  calc'd for  $\text{C}_{12}\text{H}_{16}\text{N}$   $[\text{M}+\text{H}]^+$ : 174.1277; found: 174.1272.

## Product lactams

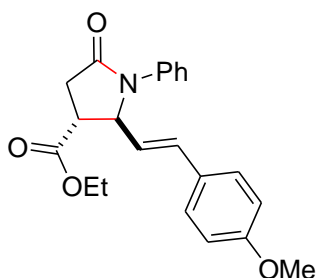

**(2S,3R)-Ethyl 2-(4-methoxystyryl)-5-oxo-1-phenylpyrrolidine-3-carboxylate (3a):**

Yellow viscous oil. 93% yield, 91% ee and 11/1 dr.  $[\alpha]_D^{20} = -15.2^\circ$  ( $c = 0.094$  g/mL,  $\text{CHCl}_3$ ). HPLC analysis—Chiralcel IA column, 90:10 hexanes/isopropanol, 1.0 mL/min, major: 18.93 min, minor: 24.56 min, 254 nm.  $^1\text{H-NMR}$  (300 MHz,  $\text{CDCl}_3$ )  $\delta$  7.44 (d,  $J = 7.5$  Hz, 2H), 7.34-7.29 (m, 2H), 7.22 (d,  $J = 8.7$  Hz, 2H), 7.16-7.11 (m, 1H), 6.80 (d,  $J = 8.7$  Hz, 2H), 6.52 (d,  $J = 15.8$  Hz, 1H), 5.92 (dd,  $J = 7.8, 15.8$  Hz, 1H), 5.05 (dd,  $J = 5.5, 7.5$  Hz, 1H), 4.22 (q,  $J = 7.1$  Hz, 2H), 3.75 (s, 3H), 3.14-3.07 (m, 1H), 3.00-2.83 (m, 2H), 1.27 (t,  $J = 7.1$  Hz, 3H).  $^{13}\text{C}\{^1\text{H}\}$  NMR (75 MHz,  $\text{CDCl}_3$ )  $\delta$  171.7, 171.2, 159.2, 137.0, 132.7, 128.4, 127.9, 127.4, 125.3, 124.4, 123.0, 113.6, 64.3, 61.1, 54.8, 43.8, 33.9, 13.7. HRMS (ESI)  $m/z$  calc'd for  $\text{C}_{22}\text{H}_{24}\text{NO}_4$   $[\text{M}+\text{H}]^+$ : 366.1700; found: 366.1697.

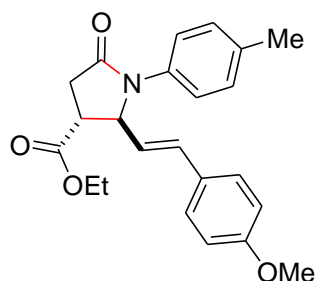

**(2S,3R)-Ethyl 2-(4-methoxystyryl)-5-oxo-1-p-tolylpyrrolidine-3-carboxylate (3b):**

Yellow viscous oil. 86% yield, 89% ee and 9/1 dr.  $[\alpha]_D^{20} = -5.4^\circ$  ( $c = 0.0236$  g/mL,  $\text{CHCl}_3$ ). HPLC analysis—Chiralcel IA column, 90:10 hexanes/isopropanol, 1.0 mL/min, major: 21.98 min, minor: 29.88 min, 254 nm.  $^1\text{H-NMR}$  (300 MHz,  $\text{CDCl}_3$ )  $\delta$  7.29-7.22 (m, 4H), 7.13 (d,  $J = 8.3$  Hz, 2H), 6.81 (d,  $J = 8.6$  Hz, 2H), 6.50 (d,  $J = 15.8$  Hz, 1H), 5.90 (dd,  $J = 7.9, 15.8$  Hz, 1H), 4.99 (dd,  $J = 5.6, 7.8$  Hz, 1H), 4.22 (q,  $J = 7.1$  Hz, 2H), 3.78 (s, 3H), 3.13-3.06 (m, 1H), 2.99-2.82 (m, 2H), 2.28 (s, 3H), 1.28 (t,  $J = 7.1$  Hz, 3H).  $^{13}\text{C}\{^1\text{H}\}$  NMR (75 MHz,  $\text{CDCl}_3$ )  $\delta$  172.1, 171.5, 159.6, 135.6, 134.6, 133.1, 129.4, 128.3, 127.8, 124.9, 123.7, 113.9, 64.8, 61.5, 55.2, 44.2, 34.3, 20.9, 14.1. HRMS (ESI)  $m/z$  calc'd for  $\text{C}_{23}\text{H}_{26}\text{NO}_4$   $[\text{M}+\text{H}]^+$ : 380.1856; found: 380.1865.

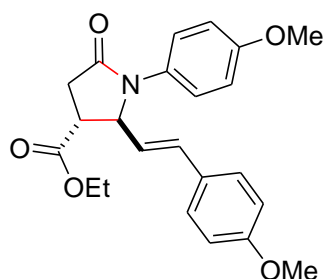

**(2S,3R)-Ethyl 2-(4-methoxystyryl)-1-(4-methoxyphenyl)-5-oxopyrrolidine-3-carboxylate**

**(3c)**: Yellow viscous oil. 35% yield, 86% ee and 6/1 dr in acrylonitrile; 87% yield, 81% ee and 4/1 dr in dichloromethane.  $[\alpha]_D^{20} = +5.3^\circ$  ( $c = 0.0233$  g/mL,  $\text{CHCl}_3$ ). HPLC analysis—Chiralcel IA column, 75:25 hexanes/isopropanol, 1.0 mL/min, major: 11.78 min, minor: 15.57 min, 254 nm.  $^1\text{H-NMR}$  (300 MHz,  $\text{CDCl}_3$ )  $\delta$  7.29-7.22 (m, 4H), 6.87-6.80 (m, 4H), 6.48 (d,  $J = 15.8$  Hz, 1H), 5.89 (dd,  $J = 8.1, 15.8$  Hz, 1H), 4.93 (dd,  $J = 5.7, 8.0$  Hz, 1H), 4.22 (q,  $J = 7.1$  Hz, 2H), 3.78 (s, 3H), 3.75 (s, 3H), 3.13-3.06 (m, 1H), 2.99-2.82 (m, 2H), 1.28 (t,  $J = 7.1$  Hz, 3H).  $^{13}\text{C}\{^1\text{H}\}$  NMR (75 MHz,  $\text{CDCl}_3$ )  $\delta$  172.2, 171.6, 159.6, 157.5, 133.3, 130.0, 128.3, 127.8, 125.6, 124.9, 114.1, 113.9, 65.2, 61.5, 55.2, 44.2, 34.2, 14.1. HRMS (ESI)  $m/z$  calc'd for  $\text{C}_{23}\text{H}_{26}\text{NO}_5$   $[\text{M}+\text{H}]^+$ : 396.1805; found: 396.1808.

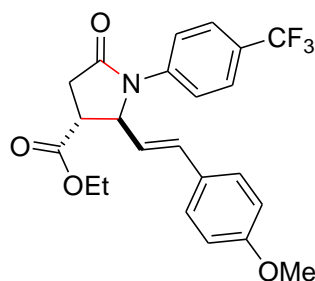

**(2S,3R)-Ethyl**

**2-(4-methoxystyryl)-1-(4-(trifluoromethyl)phenyl)-5-oxopyrrolidine-3-carboxylate (3d)**

Yellow viscous oil. 76% yield, 86% ee and 10/1 dr.  $[\alpha]_D^{20} = -24.0^\circ$  ( $c = 0.021$  g/mL,  $\text{CHCl}_3$ ). HPLC analysis—Chiralcel IA column, 95:5 hexanes/isopropanol, 1.0 mL/min, major: 29.87 min, minor: 38.57 min, 254 nm.  $^1\text{H-NMR}$  (300 MHz,  $\text{CDCl}_3$ )  $\delta$  7.64 (d,  $J = 8.9$  Hz, 2H), 7.58 (d,  $J = 9.0$  Hz, 2H), 7.25 (d,  $J = 8.5$  Hz, 2H), 6.83 (d,  $J = 8.7$  Hz, 2H), 6.55 (d,  $J = 15.9$  Hz, 1H), 5.92 (dd,  $J = 7.5, 15.9$  Hz, 1H), 5.12 (dd,  $J = 5.1, 7.3$  Hz, 1H), 4.23 (q,  $J = 7.1$  Hz, 2H), 3.79 (s, 3H), 3.15-3.08 (m, 1H), 2.94 (dq,  $J = 7.9, 17.2$  Hz, 2H), 1.29 (t,  $J = 7.1$  Hz, 3H).  $^{13}\text{C}\{^1\text{H}\}$  NMR (75 MHz,  $\text{CDCl}_3$ )  $\delta$  171.9, 159.8, 140.5, 133.4, 127.9, 125.9 (q,  $J = 3.1$  Hz), 124.0, 122.3, 114.0, 64.1, 61.7, 55.3, 44.0, 34.3, 14.1.  $^{19}\text{F}$  NMR (282 MHz,  $\text{CDCl}_3$ )  $\delta$  -62.7. HRMS (ESI)  $m/z$  calc'd for  $\text{C}_{23}\text{H}_{23}\text{F}_3\text{NO}_4$   $[\text{M}]^+$ : 434.1574; found: 434.1578.

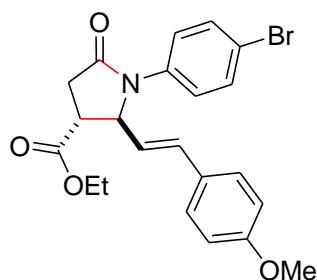

**(2S,3R)-Ethyl 2-(4-methoxystyryl)-1-(4-bromophenyl)-5-oxopyrrolidine-3-carboxylate**

**(3e)**: Yellow viscous oil. 96% yield, 89% ee and 10/1 dr.  $[\alpha]_D^{20} = +2.62^\circ$  ( $c = 0.029$  g/mL,  $\text{CHCl}_3$ ). HPLC analysis—Chiralcel IA column, 90:10 hexanes/isopropanol, 1.0 mL/min, major: 23.07 min, minor: 29.59 min, 254 nm.  $^1\text{H-NMR}$  (300 MHz,  $\text{CDCl}_3$ )  $\delta$  7.44 (d,  $J = 8.8$  Hz, 2H), 7.34 (d,  $J = 8.8$  Hz, 2H), 7.23 (d,  $J = 8.6$  Hz, 2H), 6.82 (d,  $J = 8.6$  Hz, 2H), 6.51 (d,  $J = 15.8$  Hz, 1H), 5.88 (dd,  $J = 7.8, 15.8$  Hz, 1H), 5.02 (dd,  $J = 5.5, 7.6$  Hz, 1H), 4.22 (q,  $J = 7.1$  Hz, 2H), 3.78 (s, 3H), 3.13-3.06 (m, 1H), 2.99-2.82 (m, 2H), 1.28 (t,  $J = 7.1$  Hz, 3H).  $^{13}\text{C}\{^1\text{H}\}$  NMR (75 MHz,  $\text{CDCl}_3$ )  $\delta$  172.0, 171.6, 159.8, 136.4, 133.4, 131.8, 128.0, 127.8, 124.7, 124.2, 118.7, 114.0, 64.4, 61.6, 55.3, 44.0, 34.3, 14.1. HRMS (ESI)  $m/z$  calc'd for  $\text{C}_{22}\text{H}_{23}\text{BrNO}_4$   $[\text{M}+\text{H}]^+$ : 444.0805; found: 444.0810.

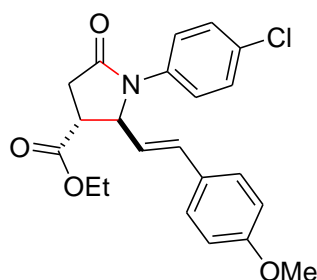

**(2S,3R)-Ethyl 2-(4-methoxystyryl)-1-(4-chlorophenyl)-5-oxopyrrolidine-3-carboxylate**

**(3f)**: Yellow viscous oil. 79% yield, 92% ee and 9/1 dr.  $[\alpha]_D^{20} = -3.2^\circ$  ( $c = 0.0248$  g/mL,  $\text{CHCl}_3$ ). HPLC analysis—Chiralcel IA column, 97:3 hexanes/isopropanol, 1.0 mL/min, major: 63.66 min, minor: 84.75 min, 254 nm.  $^1\text{H-NMR}$  (300 MHz,  $\text{CDCl}_3$ )  $\delta$  7.40 (d,  $J = 8.8$  Hz, 2H), 7.29 (d,  $J = 8.8$  Hz, 2H), 7.23 (d,  $J = 8.6$  Hz, 2H), 6.82 (d,  $J = 8.6$  Hz, 2H), 6.51 (d,  $J = 15.8$  Hz, 1H), 5.88 (dd,  $J = 7.8, 15.8$  Hz, 1H), 5.02 (dd,  $J = 5.5, 7.6$  Hz, 1H), 4.23 (q,  $J = 7.1$  Hz, 2H), 3.79 (s, 3H), 3.13-3.06 (m, 1H), 3.00-2.83 (m, 2H), 1.28 (t,  $J = 7.1$  Hz, 3H).  $^{13}\text{C}\{^1\text{H}\}$  NMR (75 MHz,  $\text{CDCl}_3$ )  $\delta$  172.0, 171.6, 159.8, 135.9, 133.4, 130.9, 128.9, 128.1, 127.9, 124.5, 124.3, 114.0, 64.5, 61.7, 55.3, 44.1, 34.3, 14.1. HRMS (ESI)  $m/z$  calc'd for  $\text{C}_{22}\text{H}_{23}\text{ClNO}_4$   $[\text{M}+\text{H}]^+$ : 400.1310; found: 400.1321.

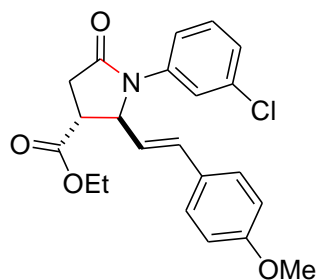

**(2S,3R)-Ethyl 2-(4-methoxystyryl)-1-(3-chlorophenyl)-5-oxopyrrolidine-3-carboxylate**

**(3g)**: Yellow viscous oil. 91% yield, 90% ee and 9/1 dr.  $[\alpha]_D^{20} = -17.6^\circ$  ( $c = 0.0238$  g/mL,  $\text{CHCl}_3$ ). HPLC analysis—Chiralcel IA column, 98:2 hexanes/isopropanol, 1.0 mL/min, major: 57.29 min, minor: 87.01 min, 280 nm.  $^1\text{H-NMR}$  (300 MHz,  $\text{CDCl}_3$ )  $\delta$  7.55 (s, 1H), 7.34-7.22 (m, 4H), 7.11 (d,  $J = 7.8$  Hz, 1H), 6.82 (d,  $J = 8.7$  Hz, 2H), 6.52 (d,  $J = 15.8$  Hz, 1H), 5.90 (dd,  $J = 7.6, 15.8$  Hz, 1H), 5.04 (dd,  $J = 5.1, 7.4$  Hz, 1H), 4.22 (q,  $J = 7.1$  Hz, 2H), 3.78 (s, 3H), 3.13-3.06 (m, 1H), 3.00-2.83 (m, 2H), 1.28 (t,  $J = 7.1$  Hz, 3H).  $^{13}\text{C}\{^1\text{H}\}$  NMR (75 MHz,  $\text{CDCl}_3$ )  $\delta$  171.9, 171.7, 159.7, 138.6, 134.4, 133.3, 129.7, 128.1, 127.9, 125.6, 124.2, 123.2, 120.9, 114.0, 64.4, 61.7, 55.3, 44.1, 34.3, 14.1. HRMS (ESI)  $m/z$  calc'd for  $\text{C}_{22}\text{H}_{23}\text{ClNO}_4$   $[\text{M}+\text{H}]^+$ : 400.1310; found: 400.1310.

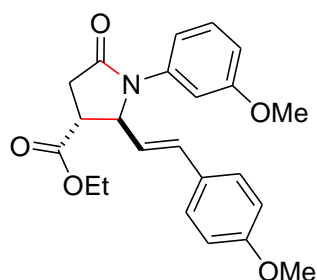

**(2S,3R)-Ethyl 2-(4-methoxystyryl)-1-(3-methoxyphenyl)-5-oxopyrrolidine-3-carboxylate**

**(3h)**: Yellow viscous oil. 64% yield, 85% ee and 9/1 dr.  $[\alpha]_D^{20} = -18.1^\circ$  ( $c = 0.0181$  g/mL,  $\text{CHCl}_3$ ). HPLC analysis—Chiralcel IA column, 90:10 hexanes/isopropanol, 1.0 mL/min, major: 21.28 min, minor: 34.42 min, 254 nm.  $^1\text{H-NMR}$  (300 MHz,  $\text{CDCl}_3$ )  $\delta$  7.26-7.22 (m, 3H), 7.08-7.07 (m, 1H), 6.99 (d,  $J = 8.0$  Hz, 1H), 6.82 (d,  $J = 8.7$  Hz, 2H), 6.70 (dd,  $J = 2.4, 8.3$  Hz, 1H), 6.52 (d,  $J = 15.8$  Hz, 1H), 5.93 (dd,  $J = 7.7, 15.8$  Hz, 1H), 5.03 (dd,  $J = 5.2, 7.6$  Hz, 1H), 4.22 (q,  $J = 7.1$  Hz, 2H), 3.78 (s, 3H), 3.76 (s, 3H), 3.12-3.05 (m, 1H), 3.00-2.83 (m, 2H), 1.28 (t,  $J = 7.2$  Hz, 3H).  $^{13}\text{C}\{^1\text{H}\}$  NMR (75 MHz,  $\text{CDCl}_3$ )  $\delta$  172.1, 171.6, 159.7, 159.6, 138.5, 132.9, 129.4, 128.3, 127.8, 124.7, 115.5, 113.9, 111.3, 109.3, 64.7, 61.5, 55.2, 44.1, 34.3, 14.1. HRMS (ESI)  $m/z$  calc'd for  $\text{C}_{23}\text{H}_{26}\text{NO}_5$   $[\text{M}+\text{H}]^+$ : 396.1805; found: 396.1797.

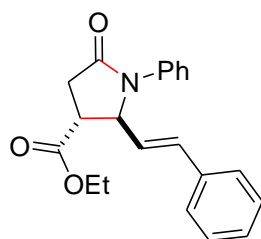

**(2S,3R)-Ethyl 5-oxo-1-phenyl-2-styrylpyrrolidine-3-carboxylate (3i):** Yellow viscous oil. 92% yield, 92% ee and 14/1 dr.  $[\alpha]_D^{20} = -21.4^\circ$  ( $c = 0.031$  g/mL,  $\text{CHCl}_3$ ). HPLC analysis—Chiralcel IA column, 90:10 hexanes/isopropanol, 1.0 mL/min, major: 13.42 min, minor: 16.92 min, 254 nm.  $^1\text{H-NMR}$  (300 MHz,  $\text{CDCl}_3$ )  $\delta$  7.44 (d,  $J = 7.7$  Hz, 2H), 7.31-7.24 (m, 7H), 7.16 (t,  $J = 7.3$  Hz, 1H), 6.59 (d,  $J = 15.9$  Hz, 1H), 6.07 (dd,  $J = 7.7, 15.9$  Hz, 1H), 5.09 (dd,  $J = 5.4, 7.5$  Hz, 1H), 4.24 (q,  $J = 7.1$  Hz, 2H), 3.12 (dt,  $J = 5.4, 8.1$  Hz, 1H), 3.02-2.85 (m, 2H), 1.29 (t,  $J = 7.1$  Hz, 3H).  $^{13}\text{C}\{^1\text{H}\}$  NMR (75 MHz,  $\text{CDCl}_3$ )  $\delta$  172.0, 171.6, 137.2, 135.5, 133.6, 128.8, 128.5, 128.2, 127.1, 126.5, 125.7, 123.4, 64.4, 61.6, 44.0, 34.3, 14.1. HRMS (ESI)  $m/z$  calc'd for  $\text{C}_{21}\text{H}_{22}\text{NO}_3$   $[\text{M}+\text{H}]^+$ : 336.1594; found: 336.1602.

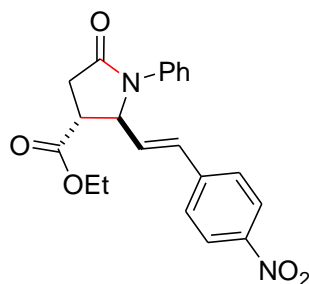

**(2S,3R)-Ethyl 2-(4-nitrostyryl)-5-oxo-1-phenylpyrrolidine-3-carboxylate (3j):** Yellow viscous oil. 95% yield, 93% ee and >20/1 dr.  $[\alpha]_D^{20} = -20.5^\circ$  ( $c = 0.0198$  g/mL,  $\text{CHCl}_3$ ). HPLC analysis—Chiralcel IA column, 80:20 hexanes/isopropanol, 1.0 mL/min, major: 18.12 min, minor: 21.45 min, 254 nm.  $^1\text{H-NMR}$  (300 MHz,  $\text{CDCl}_3$ )  $\delta$  8.13 (d,  $J = 8.7$  Hz, 2H), 7.44-7.32 (m, 6H), 7.17 (t,  $J = 7.2$  Hz, 1H), 6.65 (d,  $J = 15.9$  Hz, 1H), 6.27 (dd,  $J = 7.5, 15.9$  Hz, 1H), 5.15 (dd,  $J = 5.8, 7.0$  Hz, 1H), 4.25 (q,  $J = 7.1$  Hz, 2H), 3.14 (dt,  $J = 5.5, 8.2$  Hz, 1H), 3.03-2.87 (m, 2H), 1.29 (t,  $J = 7.1$  Hz, 3H).  $^{13}\text{C}\{^1\text{H}\}$  NMR (75 MHz,  $\text{CDCl}_3$ )  $\delta$  171.7, 171.4, 147.2, 141.8, 137.0, 132.1, 131.5, 129.0, 127.2, 126.0, 124.0, 123.2, 63.9, 61.8, 43.6, 34.2, 14.2. HRMS (ESI)  $m/z$  calc'd for  $\text{C}_{21}\text{H}_{21}\text{N}_2\text{O}_5$   $[\text{M}+\text{H}]^+$ : 381.1445; found: 381.1457.



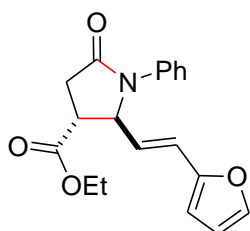

**(2S,3R)-Ethyl 2-((E)-2-(furan-2-yl)vinyl)-5-oxo-1-phenylpyrrolidine-3-carboxylate (3k):**

Yellow viscous oil. 93% yield, 89% ee and 12/1 dr.  $[\alpha]_{\text{D}}^{20} = -16.4^\circ$  ( $c = 0.026$  g/mL,  $\text{CHCl}_3$ ). HPLC analysis—Chiralcel IA column, 85:15 hexanes/isopropanol, 1.0 mL/min, major: 9.87 min, minor: 12.68 min, 254 nm.  $^1\text{H-NMR}$  (300 MHz,  $\text{CDCl}_3$ )  $\delta$  7.43 (d,  $J = 8.0$  Hz, 2H), 7.39-7.31 (m, 3H), 7.16 (t,  $J = 7.3$  Hz, 1H), 6.39-6.32 (m, 2H), 6.21 (d,  $J = 3.2$  Hz, 1H), 6.02 (dd,  $J = 7.6, 15.8$  Hz, 1H), 5.04 (dd,  $J = 5.2, 7.6$  Hz, 1H), 4.23 (q,  $J = 7.1$  Hz, 2H), 3.13-3.06 (m, 1H), 2.91 (dq,  $J = 8.0, 17.1$  Hz, 2H), 1.29 (t,  $J = 7.1$  Hz, 3H).  $^{13}\text{C}\{^1\text{H}\}$  NMR (75 MHz,  $\text{CDCl}_3$ )  $\delta$  172.0, 171.6, 151.2, 142.5, 137.3, 128.9, 125.8, 125.4, 123.3, 121.6, 111.4, 109.4, 64.1, 61.6, 44.0, 34.2, 14.1. HRMS (ESI)  $m/z$  calc'd for  $\text{C}_{19}\text{H}_{20}\text{NO}_4$   $[\text{M}+\text{H}]^+$ : 326.1387; found: 326.1385.

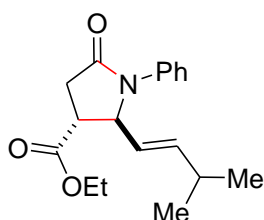

**(2S,3R)-Ethyl 2-((E)-3-methylbut-1-enyl)-5-oxo-1-phenylpyrrolidine-3-carboxylate (3l):**

Yellow viscous oil. 49% yield, 90% ee and >20/1 dr in acrylonitrile; 73% yield, 88% ee and >15/1 dr in dichloromethane.  $[\alpha]_{\text{D}}^{20} = -38.5^\circ$  ( $c = 0.0160$  g/mL,  $\text{CHCl}_3$ ). HPLC analysis—Chiralcel IA column, 98:2 hexanes/isopropanol, 1.0 mL/min, major: 23.20 min, minor: 35.12 min, 254 nm.  $^1\text{H-NMR}$  (300 MHz,  $\text{CDCl}_3$ )  $\delta$  7.45-7.30 (m, 4H), 7.18-7.15 (m, 1H), 5.63 (dd,  $J = 6.7, 15.3$  Hz, 1H), 5.23 (dd,  $J = 8.0, 15.4$  Hz, 1H), 4.78 (t,  $J = 6.7$  Hz, 1H), 4.21 (q,  $J = 7.1$  Hz, 2H), 3.00-2.96 (m, 1H), 2.87-2.85 (m, 2H), 2.21 (qd,  $J = 6.6, 13.4$  Hz, 1H), 1.28 (t,  $J = 7.1$  Hz, 3H), 0.89-0.81 (m, 6H).  $^{13}\text{C}\{^1\text{H}\}$  NMR (75 MHz,  $\text{CDCl}_3$ )  $\delta$  172.3, 171.6, 143.1, 137.2, 128.6, 125.7, 124.7, 123.9, 64.7, 61.4, 44.25, 34.4, 30.7, 21.9, 14.2. HRMS (ESI)  $m/z$  calc'd for  $\text{C}_{18}\text{H}_{24}\text{NO}_3$   $[\text{M}+\text{H}]^+$ : 302.1751; found: 302.1759.

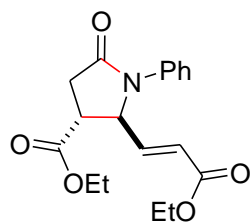

**(2S,3R)-Ethyl 2-((E)-2-(ethoxycarbonyl)vinyl)-5-oxo-1-phenylpyrrolidine-3-carboxylate (3m)**: Yellow viscous oil. 85% yield, 92% ee and 8/1 dr.  $[\alpha]_{\text{D}}^{20} = -36.5^{\circ}$  ( $c = 0.0203$  g/mL,  $\text{CHCl}_3$ ). HPLC analysis—Chiralcel IA column, 90:10 hexanes/isopropanol, 1.0 mL/min, major: 17.34 min, minor: 20.08 min, 254 nm.  $^1\text{H-NMR}$  (300 MHz,  $\text{CDCl}_3$ )  $\delta$  7.44-7.31 (m, 4H), 7.21-7.16 (m, 1H), 6.82 (dd,  $J = 7.0, 15.7$  Hz, 1H), 5.97 (d,  $J = 15.3$  Hz, 1H), 5.14-5.10 (m, 1H), 4.23 (q,  $J = 7.2$  Hz, 2H), 4.12 (q,  $J = 7.0$  Hz, 2H), 3.10-3.03 (m, 1H) ppm 2.98-2.83 (m, 2H), 1.32-1.22 (m, 6H).  $^{13}\text{C}\{^1\text{H}\}$  NMR (75 MHz,  $\text{CDCl}_3$ )  $\delta$  171.3, 171.3, 165.2, 144.3, 136.9, 129.0, 125.9, 124.2, 122.7, 62.3, 61.9, 60.8, 42.6, 33.9, 14.0. HRMS (ESI)  $m/z$  calc'd for  $\text{C}_{18}\text{H}_{22}\text{NO}_5$   $[\text{M}+\text{H}]^+$ : 332.1492; found: 332.1497.

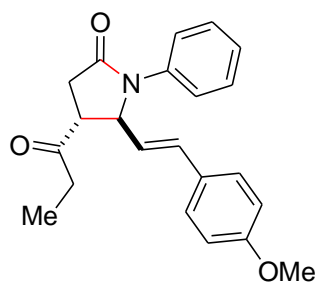

**(4R,5S)-5-(4-Methoxystyryl)-1-phenyl-4-propionylpyrrolidin-2-one (3n)**: Yellow viscous oil. 62% yield, 66% ee and 11/1 dr.  $[\alpha]_{\text{D}}^{20} = -42.0^{\circ}$  ( $c = 0.0131$  g/mL,  $\text{CHCl}_3$ ). HPLC analysis—Chiralcel IA column, 90:10 hexanes/isopropanol, 1.0 mL/min, major: 19.98 min, minor: 26.12 min, 254 nm.  $^1\text{H-NMR}$  (300 MHz,  $\text{CDCl}_3$ )  $\delta$  7.39 (d,  $J = 7.7$  Hz, 2H), 7.35-7.30 (m, 2H), 7.22 (d,  $J = 8.7$  Hz, 2H), 7.17-7.12 (m, 1H), 6.81 (d,  $J = 8.7$  Hz, 2H), 6.49 (d,  $J = 15.8$  Hz, 1H), 5.88 (dd,  $J = 8.2, 15.8$  Hz, 1H), 5.00 (dd,  $J = 6.1, 8.0$  Hz, 1H), 3.78 (s, 3H), 3.30-3.22 (m, 1H), 2.91 (dd,  $J = 9.4, 17.0$  Hz, 1H), 2.77 (dd,  $J = 8.1, 17.0$  Hz, 1H), 2.64-2.47 (m, 2H), 1.10 (t,  $J = 7.2$  Hz, 3H).  $^{13}\text{C}\{^1\text{H}\}$  NMR (75 MHz,  $\text{CDCl}_3$ )  $\delta$  208.7, 171.3, 159.7, 137.2, 133.3, 128.8, 128.2, 127.8, 125.8, 125.3, 123.8, 114.0, 63.8, 55.3, 50.3, 36.0, 34.1, 7.5. HRMS (ESI)  $m/z$  calc'd for  $\text{C}_{22}\text{H}_{24}\text{NO}_3$   $[\text{M}+\text{H}]^+$ : 350.1751; found: 350.1751.

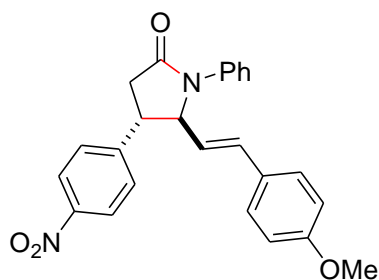

**(4S,5S)-5-(4-Methoxystyryl)-4-(4-nitrophenyl)-1-phenylpyrrolidin-2-one (3o):** White solid. 99% yield, 93% ee and 14/1 dr. M.p.: 77-79 °C.  $[\alpha]_D^{20} = -150.3^\circ$  ( $c = 0.0239$  g/mL,  $\text{CHCl}_3$ ). HPLC analysis—Chiralcel IA column, 90:10 hexanes/isopropanol, 1.0 mL/min, major: 55.19 min, minor: 42.59 min, 254 nm.  $^1\text{H-NMR}$  (300 MHz,  $\text{CDCl}_3$ )  $\delta$  8.21 (d,  $J = 8.7$  Hz, 2H), 7.50-7.43 (m, 4H), 7.37-7.32 (m, 2H), 7.21-7.14 (m, 3H), 6.81 (d,  $J = 8.7$  Hz, 2H), 6.30 (d,  $J = 15.9$  Hz, 1H), 5.96 (dd,  $J = 7.9, 15.8$  Hz, 1H), 4.71 (dd,  $J = 5.9, 7.6$  Hz, 1H), 3.78 (s, 3H), 3.54 (dd,  $J = 8.0, 14.0$  Hz, 1H), 3.17 (dd,  $J = 8.8, 17.2$  Hz, 1H), 2.81 (dd,  $J = 7.6, 17.2$  Hz, 1H).  $^{13}\text{C}\{^1\text{H}\}$  NMR (101 MHz,  $\text{CDCl}_3$ )  $\delta$  172.1, 159.8, 148.6, 147.3, 137.4, 133.4, 128.9, 128.2, 128.1, 127.8, 125.8, 124.4, 124.2, 123.3, 114.0, 69.8, 55.3, 45.4, 38.4. HRMS (ESI)  $m/z$  calc'd for  $\text{C}_{25}\text{H}_{23}\text{N}_2\text{O}_4$   $[\text{M}+\text{H}]^+$ : 415.1652; found: 415.1661.

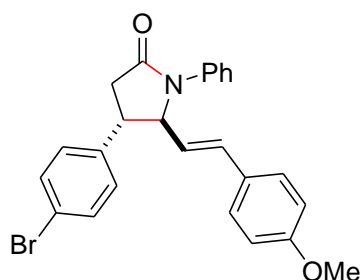

**(4S,5S)-5-(4-Methoxystyryl)-4-(4-bromophenyl)-1-phenylpyrrolidin-2-one (3p):** White solid. 58% yield, 91% ee and 17/1 dr. M.p.: 56-58 °C.  $[\alpha]_D^{20} = -117.8^\circ$  ( $c = 0.0157$  g/mL,  $\text{CHCl}_3$ ). HPLC analysis—Chiralcel IC column, 50:50 hexanes/isopropanol, 1.0 mL/min, major: 17.30 min, minor: 28.03 min, 254 nm.  $^1\text{H-NMR}$  (300 MHz,  $\text{CDCl}_3$ )  $\delta$  7.49-7.43 (m, 4H), 7.36-7.31 (m, 2H), 7.24-7.13 (m, 5H), 6.81 (d,  $J = 7.3$  Hz, 2H), 6.29 (d,  $J = 15.8$  Hz, 1H), 5.94 (dd,  $J = 7.8, 15.9$  Hz, 1H), 4.66 (t,  $J = 6.7$  Hz, 1H), 3.78 (s, 3H), 3.37 (dd,  $J = 7.6, 14.1$  Hz, 1H), 3.11 (dd,  $J = 8.8, 17.1$  Hz, 1H), 2.76 (dd,  $J = 7.5, 17.2$  Hz, 1H).  $^{13}\text{C}\{^1\text{H}\}$  NMR (75 MHz,  $\text{CDCl}_3$ )  $\delta$  172.7, 159.6, 140.1, 137.6, 132.9, 132.0, 129.0, 128.8, 128.3, 127.8, 125.6, 124.9, 123.3, 121.2, 114.0, 70.1, 55.3, 45.0, 38.5. HRMS (ESI)  $m/z$  calc'd for  $\text{C}_{25}\text{H}_{23}\text{BrNO}_2$   $[\text{M}+\text{H}]^+$ : 448.0907; found: 448.0918.

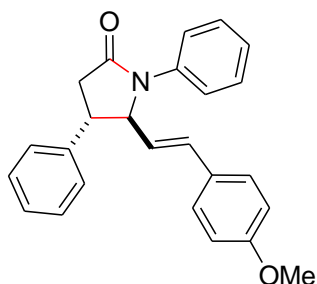

**(4S,5S)-5-(4-Methoxystyryl)-1,4-diphenylpyrrolidin-2-one (3q):** White solid. 48% yield, 90% ee and 20/1 dr. M.p.: 49-51 °C.  $[\alpha]_D^{20} = -94.6^\circ$  ( $c = 0.0121$  g/mL,  $\text{CHCl}_3$ ). HPLC analysis—Chiralcel IC column, 50:50 hexanes/isopropanol, 1.0 mL/min, major: 15.86 min, minor: 16.99 min, 254 nm.  $^1\text{H-NMR}$  (300 MHz,  $\text{CDCl}_3$ )  $\delta$  7.47 (d,  $J = 8.1$  Hz, 2H), 7.39-7.29 (m, 7H), 7.22-7.12 (m, 3H), 6.81 (d,  $J = 8.7$  Hz, 2H), 6.29 (d,  $J = 15.9$  Hz, 1H), 5.98 (dd,  $J = 7.7, 15.9$  Hz, 1H), 4.72 (dd,  $J = 5.6, 7.6$  Hz, 1H), 3.78 (s, 3H), 3.41 (dd,  $J = 8.0, 13.6$  Hz, 1H), 3.13 (dd,  $J = 8.8, 17.2$  Hz, 1H), 2.82 (dd,  $J = 7.3, 17.2$  Hz, 1H).  $^{13}\text{C}\{^1\text{H}\}$  NMR (75 MHz,  $\text{CDCl}_3$ )  $\delta$  173.1, 159.5, 141.3, 137.8, 132.6, 128.9, 128.8, 128.6, 127.7, 127.3, 127.2, 125.5, 125.4, 123.3, 113.9, 70.2, 55.3, 45.4, 38.8. HRMS (ESI)  $m/z$  calc'd for  $\text{C}_{25}\text{H}_{24}\text{NO}_2$   $[\text{M}+\text{H}]^+$ : 370.1802; found: 370.1797.

#### 4. Absolute configuration assignment

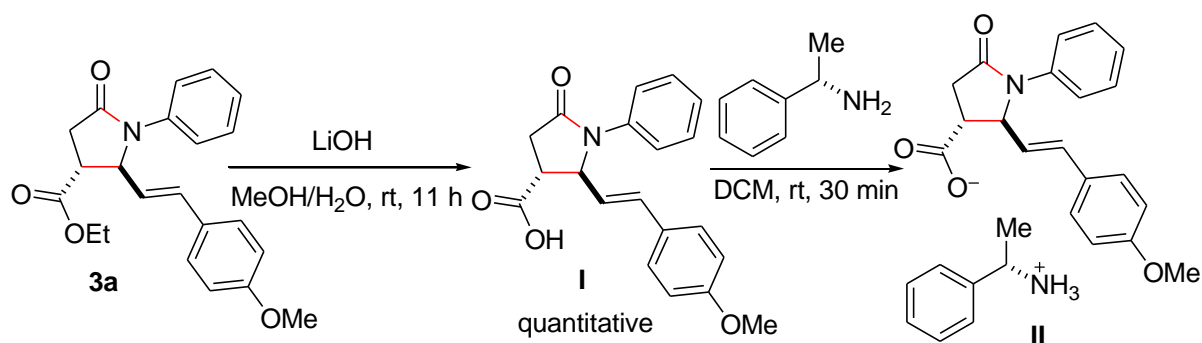

In a 20-mL vial was added ester **3a** (33.0 mg, 0.09 mmol), MeOH (3 mL) and  $\text{H}_2\text{O}$  (1 mL). LiOH (10.8 mg, 0.45 mmol) was then added. The solution was stirred at room temperature for 11 h. MeOH was removed under reduced pressure. The aqueous solution was acidified with 1 M HCl until pH = 2~3. The resulting mixture was extracted with EtOAc (4 mL x 3), dried over  $\text{Na}_2\text{SO}_4$ , filtered and concentrated to give slightly yellow solid residue, which was purified by silica gel column chromatography (eluent: EtOAc) to quantitatively give the desired product acid **I** as a white solid. Acid **I**: White solid.  $^1\text{H-NMR}$  (300 MHz,  $\text{CDCl}_3$ )  $\delta$  9.72 (br,

1H), 7.41 (d,  $J = 8.0$  Hz, 2H), 7.33 (t,  $J = 7.8$  Hz, 2H), 7.24-7.14 (m, 3H), 6.81 (d,  $J = 8.6$  Hz, 2H), 6.53 (d,  $J = 15.8$  Hz, 1H), 5.92 (dd,  $J = 7.8, 15.8$  Hz, 1H), 5.07 (dd,  $J = 5.1, 7.6$  Hz, 1H), 3.78 (s, 3H), 3.18-3.12 (m, 1H), 3.08-2.90 (m, 2H).  $^{13}\text{C}\{^1\text{H}\}$  NMR (101 MHz,  $\text{CDCl}_3$ )  $\delta$  176.3, 172.1, 159.7, 137.0, 133.5, 128.8, 128.2, 127.9, 126.1, 124.3, 123.7, 114.0, 64.8, 55.2, 43.9, 34.1. Treatment of obtained acid **I** with 1 eq. (s)-1-phenylethylamine afforded counterion **II**. Crude  $^1\text{H}$  NMR: (300 MHz,  $\text{CDCl}_3$ )  $\delta$  8.59 (br, 3H), 7.42 (d,  $J = 8.1$  Hz, 2H), 7.32-7.15 (m, 9H), 7.08 (t,  $J = 7.3$  Hz, 1H), 6.78 (d,  $J = 8.6$  Hz, 2H), 6.34 (d,  $J = 15.9$  Hz, 1H), 5.81 (dd,  $J = 7.2, 15.9$  Hz, 1H), 4.89 (dd,  $J = 4.1, 6.9$  Hz, 1H), 4.12-3.99 (m, 1H), 3.75 (s, 3H), 2.61-2.36 (m, 3H), 1.38 (d,  $J = 6.6$  Hz, 3H) (Note: the spectra are on page S41). A single crystal of **II** suitable for X-ray analysis was obtained by slow volatilization of its DCM/EtOAc solution.

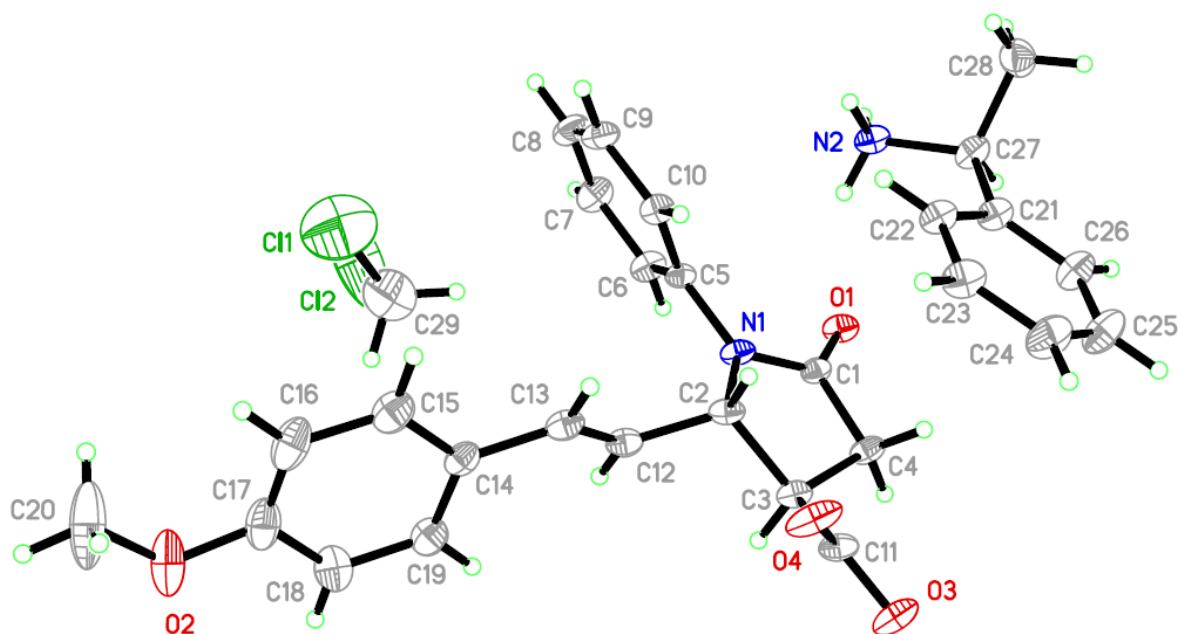

Table 1. Crystal data and structure refinement for rovis125.

|                      |                                                             |                |
|----------------------|-------------------------------------------------------------|----------------|
| Identification code  | rovis125                                                    |                |
| Empirical formula    | $\text{C}_{29}\text{H}_{32}\text{Cl}_2\text{N}_2\text{O}_4$ |                |
| Formula weight       | 543.47                                                      |                |
| Temperature          | 120 K                                                       |                |
| Wavelength           | 0.71073 Å                                                   |                |
| Crystal system       | Monoclinic                                                  |                |
| Space group          | $P2_1$                                                      |                |
| Unit cell dimensions | $a = 6.0055(2)$ Å                                           | $= 90^\circ$ . |

|                                        |                                      |                       |
|----------------------------------------|--------------------------------------|-----------------------|
|                                        | $b = 27.8264(8) \text{ \AA}$         | $= 99.216(2)^\circ$ . |
|                                        | $c = 8.3886(2) \text{ \AA}$          | $= 90^\circ$ .        |
| Volume                                 | 1383.74(7) $\text{\AA}^3$            |                       |
| Z                                      | 2                                    |                       |
| Density (calculated)                   | 1.304 $\text{Mg/m}^3$                |                       |
| Absorption coefficient                 | 0.272 $\text{mm}^{-1}$               |                       |
| F(000)                                 | 572                                  |                       |
| Crystal size                           | 0.25 x 0.14 x 0.13 $\text{mm}^3$     |                       |
| Theta range for data collection        | 2.46 to 28.33 $^\circ$               |                       |
| Index ranges                           | -6<=h<=8, -37<=k<=35, -11<=l<=11     |                       |
| Reflections collected                  | 24033                                |                       |
| Independent reflections                | 6583 [R(int) = 0.0384]               |                       |
| Completeness to theta = 28.33 $^\circ$ | 99.7 %                               |                       |
| Absorption correction                  | Semi-empirical from equivalents      |                       |
| Max. and min. transmission             | 0.9661 and 0.9357                    |                       |
| Refinement method                      | Full-matrix least-squares on $F^2$   |                       |
| Data / restraints / parameters         | 6583 / 1 / 338                       |                       |
| Goodness-of-fit on $F^2$               | 1.057                                |                       |
| Final R indices [I>2sigma(I)]          | R1 = 0.0589, wR2 = 0.1588            |                       |
| R indices (all data)                   | R1 = 0.0774, wR2 = 0.1787            |                       |
| Absolute structure parameter           | 0.13(11)                             |                       |
| Largest diff. peak and hole            | 0.459 and -0.741 $\text{e.\AA}^{-3}$ |                       |

Table 2. Atomic coordinates ( x 10<sup>4</sup>) and equivalent isotropic displacement parameters ( $\text{\AA}^2 \times 10^3$ )

for rovis125. U(eq) is defined as one third of the trace of the orthogonalized  $U^{ij}$  tensor.

|      | x       | y       | z       | U(eq) |
|------|---------|---------|---------|-------|
| C(1) | 1863(5) | 2009(1) | 5135(3) | 17(1) |
| C(2) | 5441(5) | 2326(1) | 6283(3) | 18(1) |

|       |          |         |         |        |
|-------|----------|---------|---------|--------|
| C(3)  | 4442(5)  | 2079(1) | 7641(3) | 17(1)  |
| C(4)  | 2505(5)  | 1762(1) | 6743(3) | 19(1)  |
| C(5)  | 3534(5)  | 2591(1) | 3482(3) | 17(1)  |
| C(6)  | 1679(5)  | 2866(1) | 2827(3) | 23(1)  |
| C(7)  | 1724(6)  | 3117(1) | 1389(4) | 26(1)  |
| C(8)  | 3599(6)  | 3093(1) | 636(3)  | 27(1)  |
| C(9)  | 5450(6)  | 2823(1) | 1293(3) | 24(1)  |
| C(10) | 5428(5)  | 2568(1) | 2709(3) | 20(1)  |
| C(11) | 6158(5)  | 1808(1) | 8852(3) | 20(1)  |
| C(12) | 6259(5)  | 2827(1) | 6714(3) | 21(1)  |
| C(13) | 8312(5)  | 2990(1) | 6664(3) | 23(1)  |
| C(14) | 9162(5)  | 3472(1) | 7138(3) | 22(1)  |
| C(15) | 11057(6) | 3653(1) | 6588(4) | 30(1)  |
| C(16) | 11912(6) | 4110(1) | 7032(5) | 36(1)  |
| C(17) | 10840(6) | 4391(1) | 8044(5) | 33(1)  |
| C(18) | 8956(6)  | 4215(1) | 8606(4) | 32(1)  |
| C(19) | 8130(6)  | 3764(1) | 8154(4) | 26(1)  |
| C(20) | 13554(7) | 5026(2) | 8155(9) | 66(2)  |
| C(21) | 2809(5)  | 941(1)  | 3081(3) | 22(1)  |
| C(22) | 4922(5)  | 1158(1) | 3455(3) | 22(1)  |
| C(23) | 6412(5)  | 1024(1) | 4844(4) | 28(1)  |
| C(24) | 5769(6)  | 669(1)  | 5851(4) | 35(1)  |
| C(25) | 3691(6)  | 455(1)  | 5495(4) | 35(1)  |
| C(26) | 2208(6)  | 588(1)  | 4119(4) | 29(1)  |
| C(27) | 1158(5)  | 1067(1) | 1574(3) | 22(1)  |
| C(28) | 1447(7)  | 759(1)  | 118(4)  | 34(1)  |
| C(29) | 5684(11) | 4041(2) | 3524(7) | 74(2)  |
| Cl(1) | 8191(3)  | 4076(1) | 2820(2) | 93(1)  |
| Cl(2) | 3567(3)  | 4372(1) | 2335(4) | 129(1) |
| N(1)  | 3506(4)  | 2334(1) | 4948(3) | 17(1)  |
| N(2)  | 1327(4)  | 1581(1) | 1106(3) | 20(1)  |
| O(1)  | 193(3)   | 1923(1) | 4130(2) | 20(1)  |
| O(2)  | 11530(5) | 4840(1) | 8580(4) | 47(1)  |
| O(3)  | 5437(4)  | 1601(1) | 9984(2) | 28(1)  |
| O(4)  | 8174(4)  | 1819(1) | 8644(2) | 31(1)  |

Table 3. Bond lengths [ $\text{\AA}$ ] and angles [ $^\circ$ ] for rovis125.

|             |          |
|-------------|----------|
| C(1)-O(1)   | 1.225(3) |
| C(1)-N(1)   | 1.366(4) |
| C(1)-C(4)   | 1.509(4) |
| C(2)-N(1)   | 1.480(4) |
| C(2)-C(12)  | 1.503(4) |
| C(2)-C(3)   | 1.534(4) |
| C(3)-C(11)  | 1.524(4) |
| C(3)-C(4)   | 1.555(4) |
| C(5)-C(6)   | 1.390(4) |
| C(5)-C(10)  | 1.398(4) |
| C(5)-N(1)   | 1.425(3) |
| C(6)-C(7)   | 1.398(4) |
| C(7)-C(8)   | 1.379(5) |
| C(8)-C(9)   | 1.382(5) |
| C(9)-C(10)  | 1.385(4) |
| C(11)-O(3)  | 1.247(3) |
| C(11)-O(4)  | 1.251(4) |
| C(12)-C(13) | 1.321(4) |
| C(13)-C(14) | 1.466(4) |
| C(14)-C(15) | 1.389(4) |
| C(14)-C(19) | 1.393(4) |
| C(15)-C(16) | 1.400(5) |
| C(16)-C(17) | 1.387(6) |
| C(17)-O(2)  | 1.368(4) |
| C(17)-C(18) | 1.383(5) |
| C(18)-C(19) | 1.381(5) |
| C(20)-O(2)  | 1.419(5) |
| C(21)-C(22) | 1.395(4) |
| C(21)-C(26) | 1.399(4) |
| C(21)-C(27) | 1.518(4) |
| C(22)-C(23) | 1.401(4) |
| C(23)-C(24) | 1.393(5) |
| C(24)-C(25) | 1.372(6) |
| C(25)-C(26) | 1.390(5) |
| C(27)-N(2)  | 1.491(4) |
| C(27)-C(28) | 1.525(4) |
| C(29)-Cl(1) | 1.706(6) |
| C(29)-Cl(2) | 1.749(7) |



|                   |          |
|-------------------|----------|
| O(1)-C(1)-N(1)    | 125.2(2) |
| O(1)-C(1)-C(4)    | 126.2(2) |
| N(1)-C(1)-C(4)    | 108.6(2) |
| N(1)-C(2)-C(12)   | 110.8(2) |
| N(1)-C(2)-C(3)    | 102.4(2) |
| C(12)-C(2)-C(3)   | 112.9(2) |
| C(11)-C(3)-C(2)   | 114.4(2) |
| C(11)-C(3)-C(4)   | 114.6(2) |
| C(2)-C(3)-C(4)    | 104.3(2) |
| C(1)-C(4)-C(3)    | 103.8(2) |
| C(6)-C(5)-C(10)   | 120.1(2) |
| C(6)-C(5)-N(1)    | 119.9(2) |
| C(10)-C(5)-N(1)   | 120.0(2) |
| C(5)-C(6)-C(7)    | 119.4(3) |
| C(8)-C(7)-C(6)    | 120.1(3) |
| C(7)-C(8)-C(9)    | 120.5(3) |
| C(8)-C(9)-C(10)   | 120.2(3) |
| C(9)-C(10)-C(5)   | 119.7(3) |
| O(3)-C(11)-O(4)   | 125.4(3) |
| O(3)-C(11)-C(3)   | 117.1(3) |
| O(4)-C(11)-C(3)   | 117.5(2) |
| C(13)-C(12)-C(2)  | 125.6(3) |
| C(12)-C(13)-C(14) | 126.3(3) |
| C(15)-C(14)-C(19) | 117.4(3) |
| C(15)-C(14)-C(13) | 120.6(3) |
| C(19)-C(14)-C(13) | 122.0(3) |
| C(14)-C(15)-C(16) | 121.7(3) |
| C(17)-C(16)-C(15) | 119.3(3) |
| O(2)-C(17)-C(18)  | 115.6(3) |
| O(2)-C(17)-C(16)  | 124.8(3) |
| C(18)-C(17)-C(16) | 119.6(3) |
| C(19)-C(18)-C(17) | 120.4(3) |
| C(18)-C(19)-C(14) | 121.5(3) |
| C(22)-C(21)-C(26) | 118.7(3) |
| C(22)-C(21)-C(27) | 122.4(3) |
| C(26)-C(21)-C(27) | 118.8(3) |
| C(21)-C(22)-C(23) | 120.5(3) |

|                   |          |
|-------------------|----------|
| C(24)-C(23)-C(22) | 119.4(3) |
| C(25)-C(24)-C(23) | 120.4(3) |
| C(24)-C(25)-C(26) | 120.3(3) |
| C(25)-C(26)-C(21) | 120.6(3) |
| N(2)-C(27)-C(21)  | 112.3(2) |
| N(2)-C(27)-C(28)  | 107.9(2) |
| C(21)-C(27)-C(28) | 113.2(3) |
| Cl(1)-C(29)-Cl(2) | 111.9(3) |
| C(1)-N(1)-C(5)    | 122.7(2) |
| C(1)-N(1)-C(2)    | 113.4(2) |
| C(5)-N(1)-C(2)    | 123.0(2) |
| C(17)-O(2)-C(20)  | 118.5(3) |

---

Symmetry transformations used to generate equivalent atoms:

Table 4. Anisotropic displacement parameters ( $\text{\AA}^2 \times 10^3$ ) for rovis125. The anisotropic displacement factor exponent takes the form:  $-2 \sum_{i,j} h^2 a_i^* U_{ij} + \dots + 2 h k a_i^* b_j^* U_{ij}$

---

|       | U11   | U22   | U33   | U23   | U13   | U12   |
|-------|-------|-------|-------|-------|-------|-------|
| C(1)  | 16(1) | 20(1) | 15(1) | 2(1)  | 4(1)  | 3(1)  |
| C(2)  | 12(1) | 26(1) | 13(1) | 0(1)  | 1(1)  | 2(1)  |
| C(3)  | 10(1) | 26(1) | 14(1) | 2(1)  | 1(1)  | 3(1)  |
| C(4)  | 14(1) | 29(1) | 15(1) | 5(1)  | 0(1)  | -1(1) |
| C(5)  | 19(2) | 21(1) | 12(1) | 1(1)  | 1(1)  | 1(1)  |
| C(6)  | 18(2) | 29(2) | 22(1) | 4(1)  | 4(1)  | 4(1)  |
| C(7)  | 22(2) | 31(2) | 24(1) | 8(1)  | -2(1) | 5(1)  |
| C(8)  | 30(2) | 33(2) | 18(1) | 7(1)  | 2(1)  | -3(1) |
| C(9)  | 22(2) | 35(2) | 16(1) | -1(1) | 5(1)  | -4(1) |
| C(10) | 15(2) | 26(1) | 18(1) | 1(1)  | 0(1)  | 0(1)  |
| C(11) | 16(1) | 30(1) | 14(1) | 1(1)  | 1(1)  | 4(1)  |
| C(12) | 19(2) | 27(1) | 16(1) | 1(1)  | 2(1)  | 3(1)  |
| C(13) | 23(2) | 29(2) | 16(1) | 3(1)  | 2(1)  | 2(1)  |
| C(14) | 17(2) | 27(1) | 20(1) | 6(1)  | 0(1)  | 0(1)  |
| C(15) | 22(2) | 37(2) | 32(2) | 5(1)  | 6(1)  | -1(1) |
| C(16) | 22(2) | 37(2) | 50(2) | 14(2) | 7(2)  | -3(1) |

|       |       |        |        |        |        |        |
|-------|-------|--------|--------|--------|--------|--------|
| C(17) | 27(2) | 24(2)  | 47(2)  | 9(1)   | -1(2)  | 0(1)   |
| C(18) | 26(2) | 27(2)  | 41(2)  | 0(1)   | 4(1)   | 2(1)   |
| C(19) | 20(2) | 30(2)  | 29(1)  | 2(1)   | 6(1)   | -1(1)  |
| C(20) | 25(2) | 32(2)  | 139(5) | 10(3)  | 8(3)   | -8(2)  |
| C(21) | 18(2) | 27(1)  | 21(1)  | 4(1)   | 3(1)   | 4(1)   |
| C(22) | 16(2) | 29(1)  | 22(1)  | 4(1)   | 3(1)   | 4(1)   |
| C(23) | 20(2) | 37(2)  | 24(1)  | 5(1)   | -3(1)  | 5(1)   |
| C(24) | 33(2) | 41(2)  | 29(2)  | 13(2)  | -2(1)  | 11(2)  |
| C(25) | 31(2) | 40(2)  | 34(2)  | 18(2)  | 4(2)   | 4(2)   |
| C(26) | 25(2) | 34(2)  | 29(2)  | 9(1)   | 4(1)   | 0(1)   |
| C(27) | 16(2) | 30(1)  | 20(1)  | 6(1)   | -1(1)  | -4(1)  |
| C(28) | 44(2) | 28(2)  | 27(2)  | -1(1)  | -2(1)  | 0(2)   |
| C(29) | 91(4) | 67(3)  | 67(3)  | -13(3) | 25(3)  | -13(3) |
| Cl(1) | 77(1) | 113(1) | 91(1)  | 9(1)   | 20(1)  | 22(1)  |
| Cl(2) | 65(1) | 66(1)  | 236(3) | -49(1) | -36(1) | 9(1)   |
| N(1)  | 11(1) | 27(1)  | 12(1)  | 2(1)   | -1(1)  | 1(1)   |
| N(2)  | 14(1) | 28(1)  | 16(1)  | 4(1)   | 0(1)   | 4(1)   |
| O(1)  | 13(1) | 31(1)  | 16(1)  | 1(1)   | -2(1)  | 0(1)   |
| O(2)  | 35(2) | 23(1)  | 81(2)  | 5(1)   | 4(1)   | -5(1)  |
| O(3)  | 18(1) | 44(1)  | 22(1)  | 15(1)  | 4(1)   | 2(1)   |
| O(4)  | 14(1) | 61(2)  | 20(1)  | 16(1)  | 4(1)   | 8(1)   |

Table 5. Hydrogen coordinates ( $\times 10^4$ ) and isotropic displacement parameters ( $\text{\AA}^2 \times 10^3$ ) for rovis125.

|       | x    | y    | z    | U(eq) |
|-------|------|------|------|-------|
| H(2)  | 6669 | 2132 | 5981 | 21    |
| H(3)  | 3758 | 2327 | 8233 | 20    |
| H(4A) | 3022 | 1436 | 6603 | 23    |
| H(4B) | 1238 | 1751 | 7329 | 23    |
| H(6)  | 419  | 2882 | 3340 | 28    |
| H(7)  | 487  | 3301 | 941  | 32    |
| H(8)  | 3618 | 3260 | -323 | 33    |
| H(9)  | 6716 | 2812 | 784  | 29    |
| H(10) | 6667 | 2383 | 3144 | 24    |
| H(12) | 5231 | 3041 | 7045 | 25    |

|        |       |      |      |    |
|--------|-------|------|------|----|
| H(13)  | 9315  | 2779 | 6293 | 27 |
| H(15)  | 11777 | 3465 | 5907 | 36 |
| H(16)  | 13185 | 4224 | 6651 | 43 |
| H(18)  | 8240  | 4402 | 9292 | 38 |
| H(19)  | 6855  | 3652 | 8537 | 31 |
| H(20A) | 14812 | 4840 | 8671 | 99 |
| H(20B) | 13738 | 5354 | 8502 | 99 |
| H(20C) | 13483 | 5010 | 7005 | 99 |
| H(22)  | 5345  | 1394 | 2778 | 26 |
| H(23)  | 7817  | 1170 | 5091 | 33 |
| H(24)  | 6755  | 577  | 6770 | 42 |
| H(25)  | 3273  | 220  | 6177 | 42 |
| H(26)  | 803   | 440  | 3888 | 35 |
| H(27)  | -369  | 1013 | 1809 | 27 |
| H(28A) | 287   | 837  | -770 | 50 |
| H(28B) | 1340  | 426  | 389  | 50 |
| H(28C) | 2898  | 821  | -181 | 50 |
| H(29A) | 5882  | 4160 | 4624 | 88 |
| H(29B) | 5222  | 3707 | 3539 | 88 |
| H(2A)  | 1344  | 1767 | 1972 | 30 |
| H(2B)  | 145   | 1658 | 367  | 30 |
| H(2C)  | 2591  | 1626 | 698  | 30 |

---

## 5. NMR spectra for new compounds

### NMR Spectra of Triazolium Salt C4

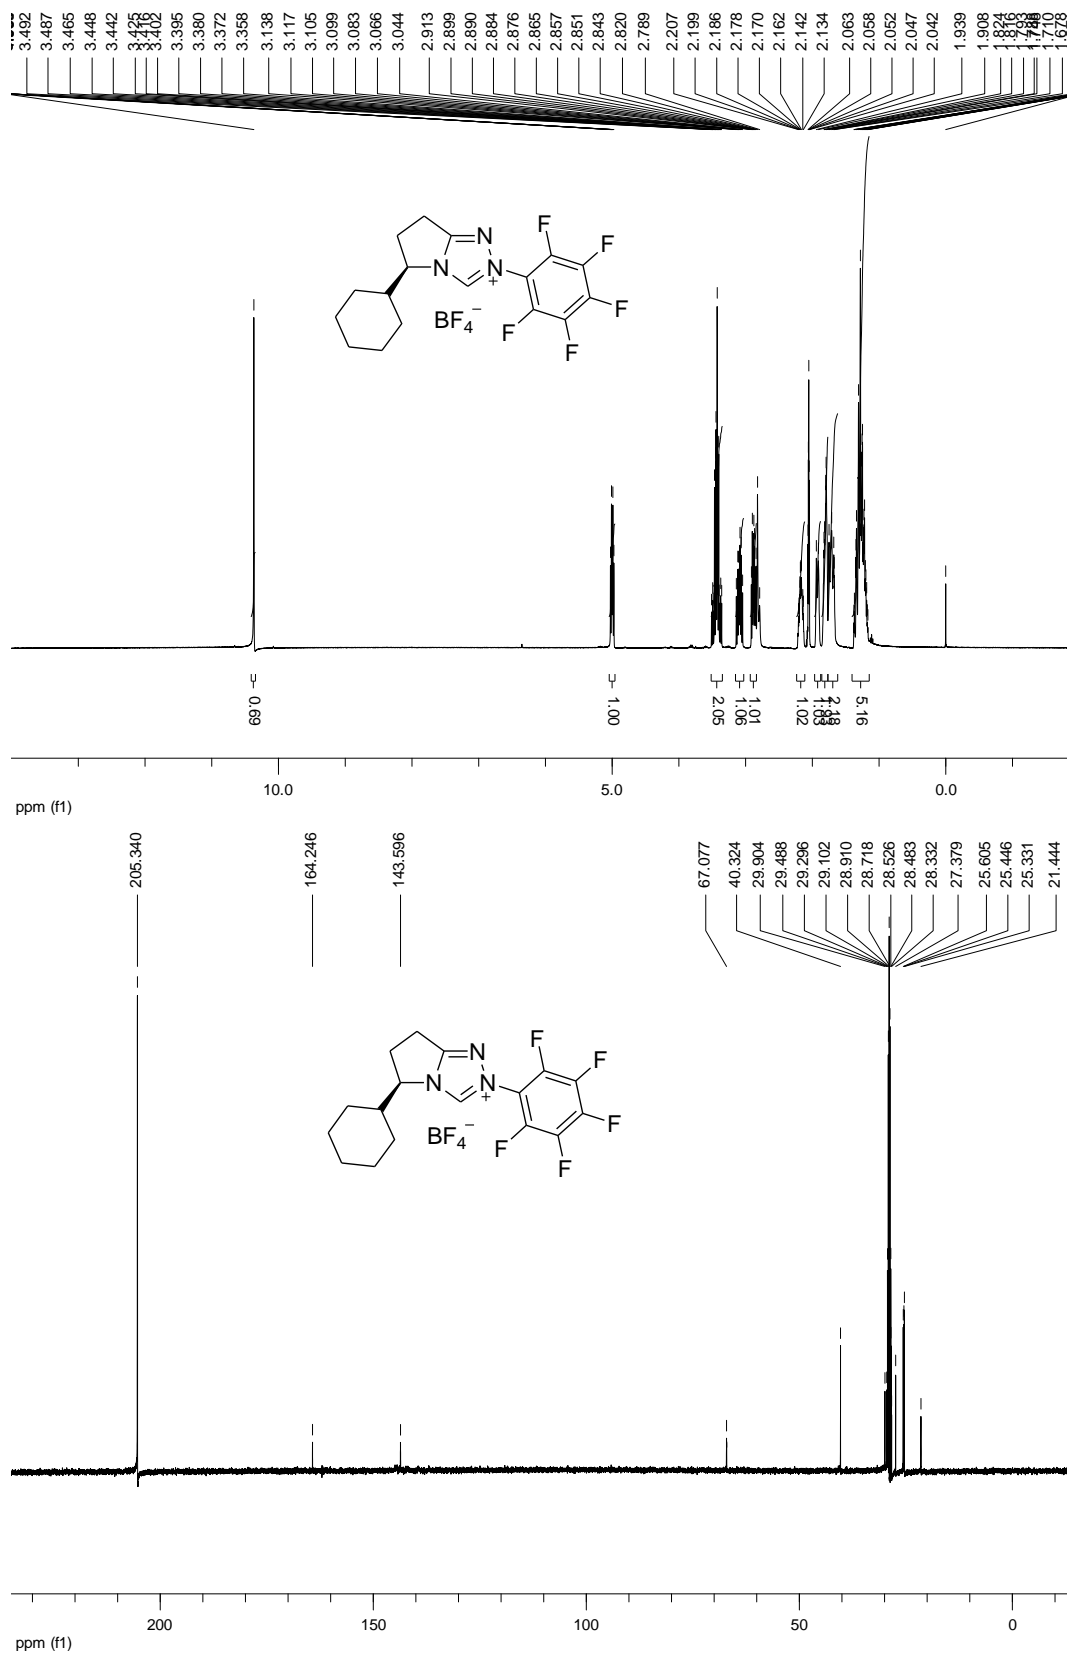

**NMR Spectra of Triazolium Salt C3**

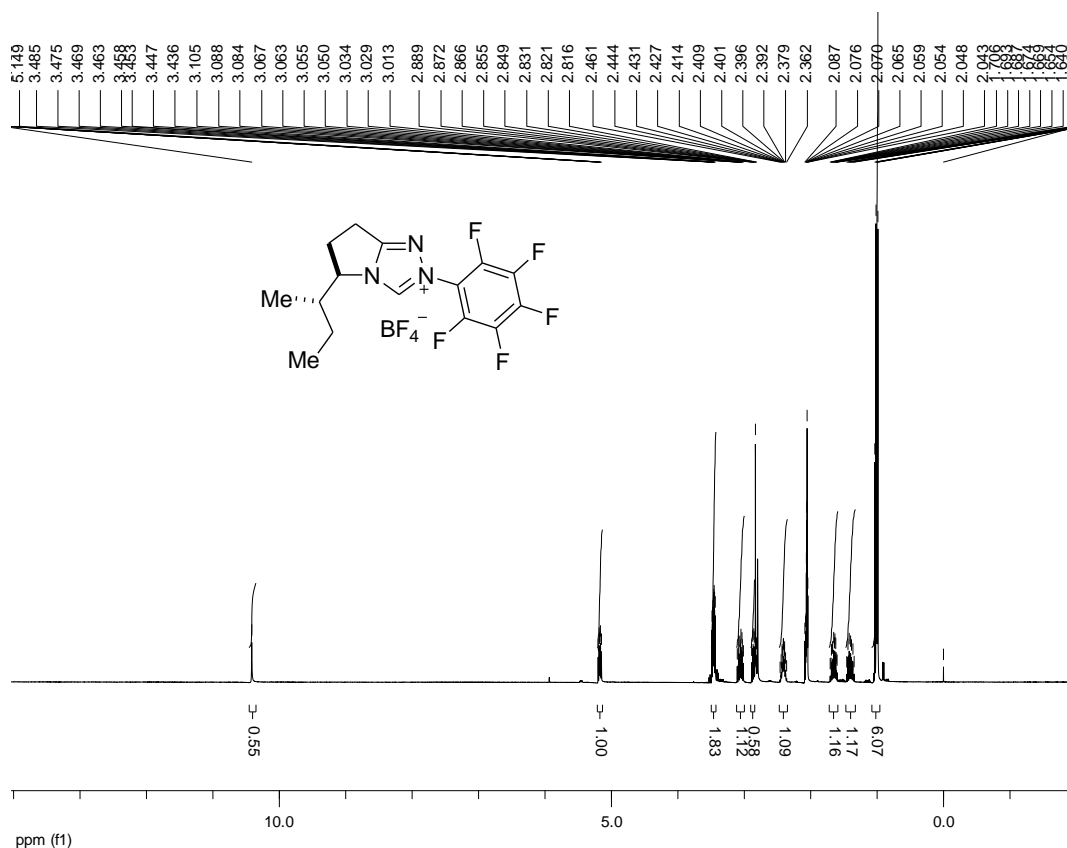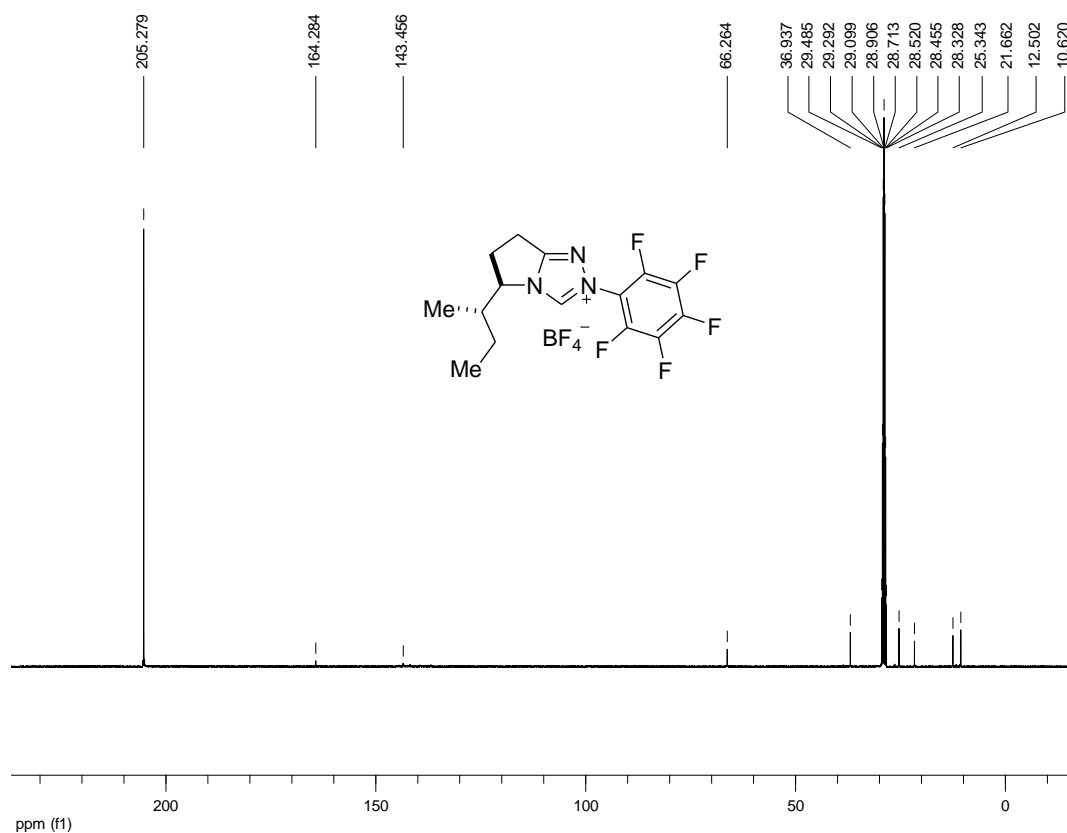

**NMR Spectra of *N*-(4-Methoxycinnamylidene)aniline (1a)**

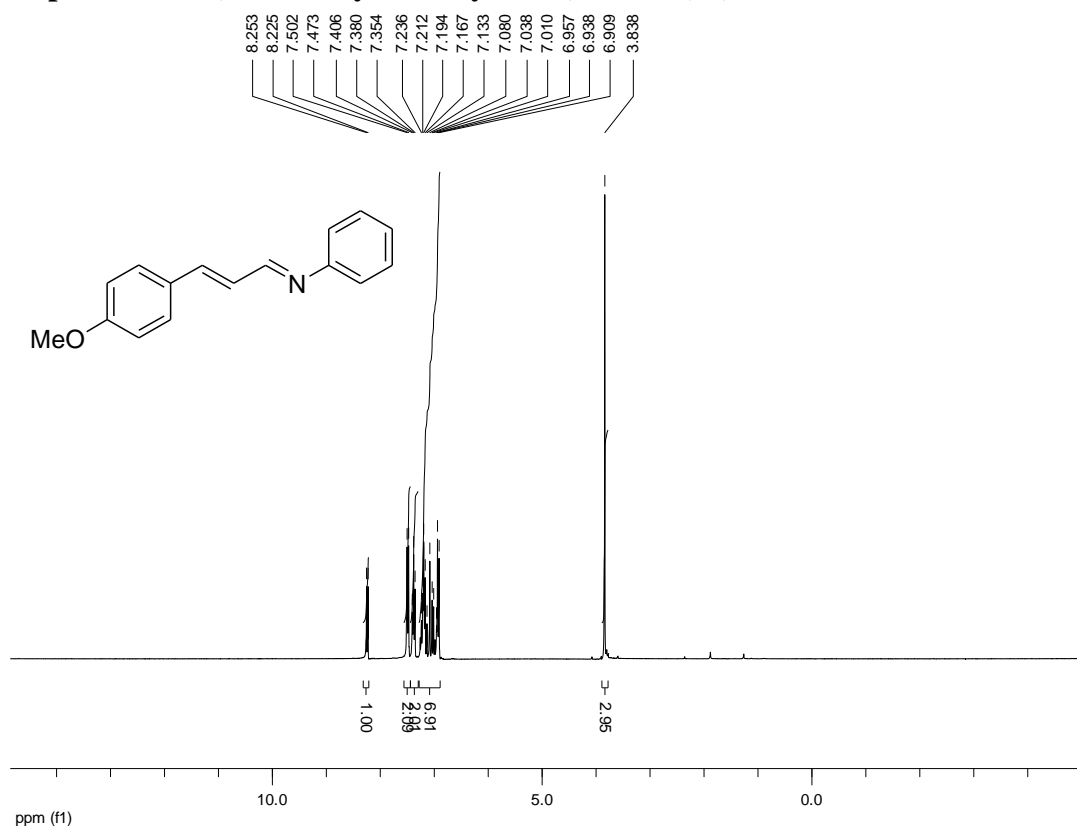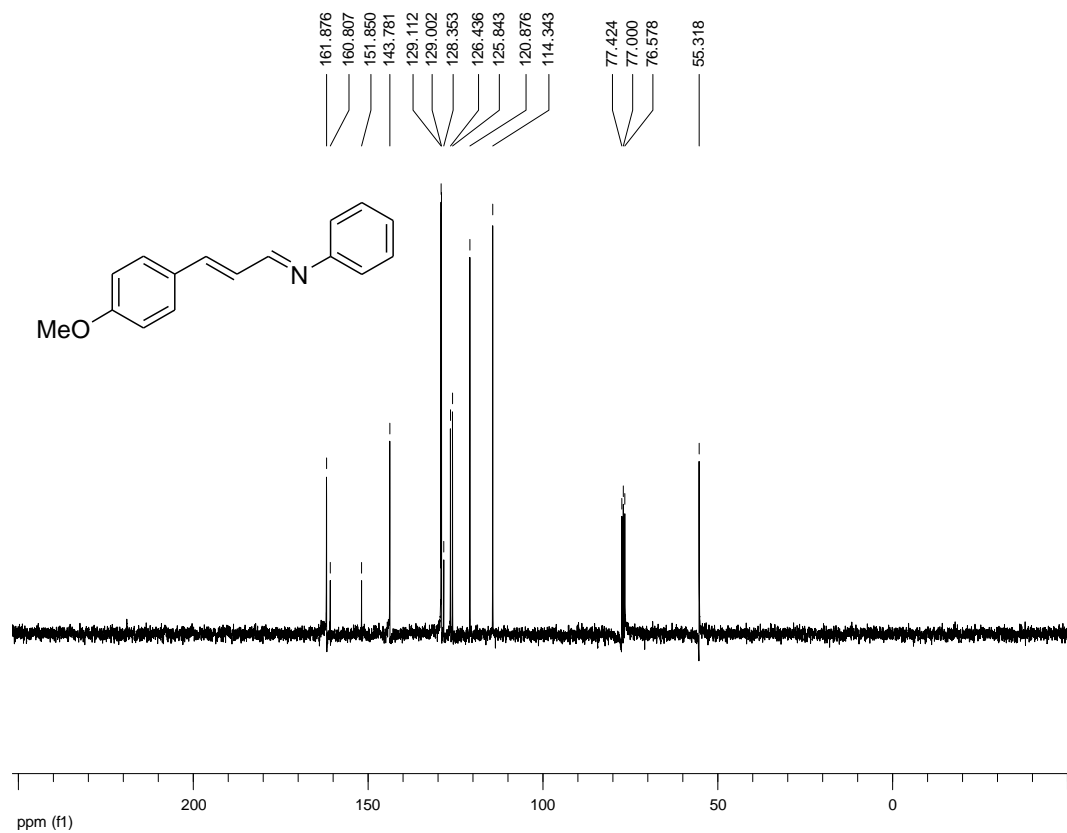

**NMR Spectra of *N*-(4-Methoxycinnamylidene)-4-methylaniline**

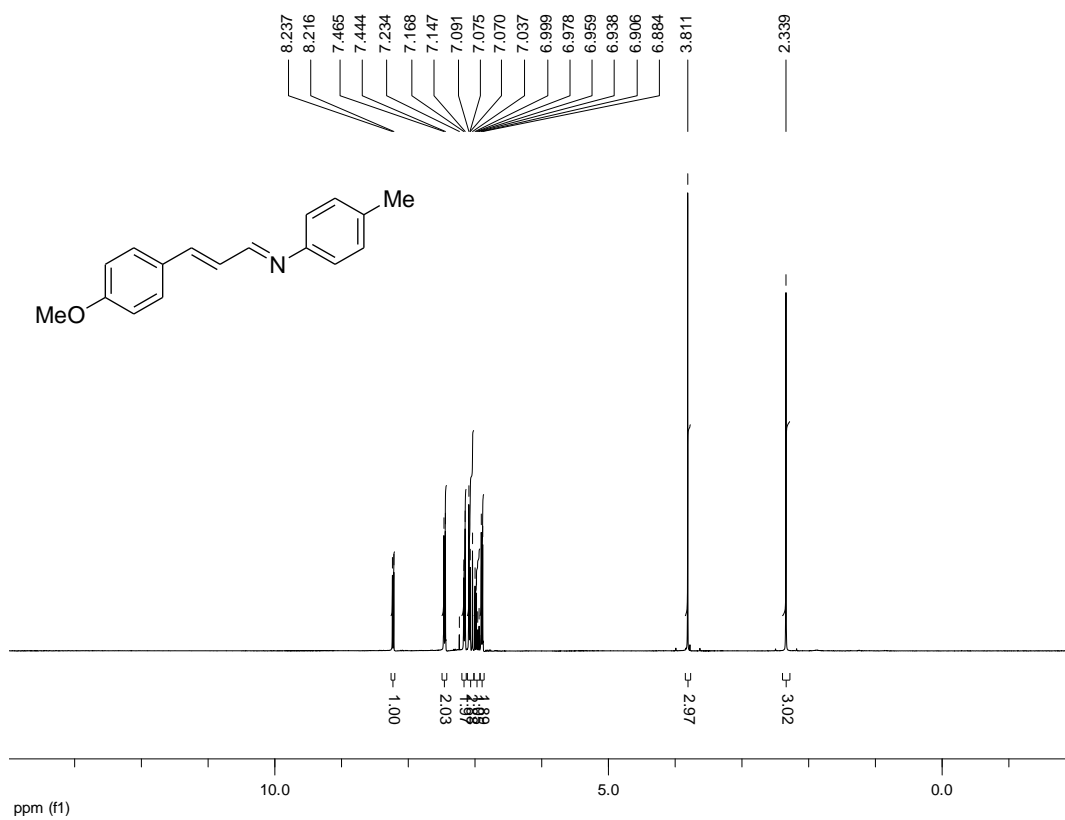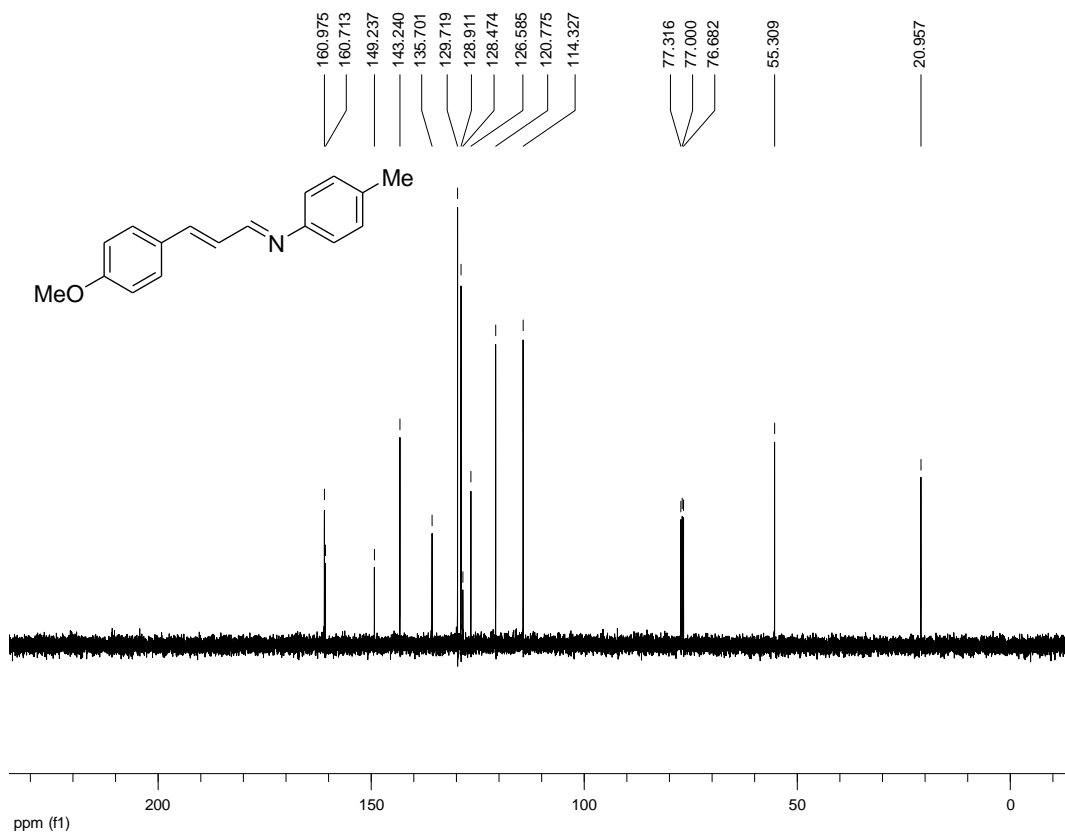



**NMR Spectra of *N*-(4-Methoxycinnamylidene)-4-methoxyaniline**

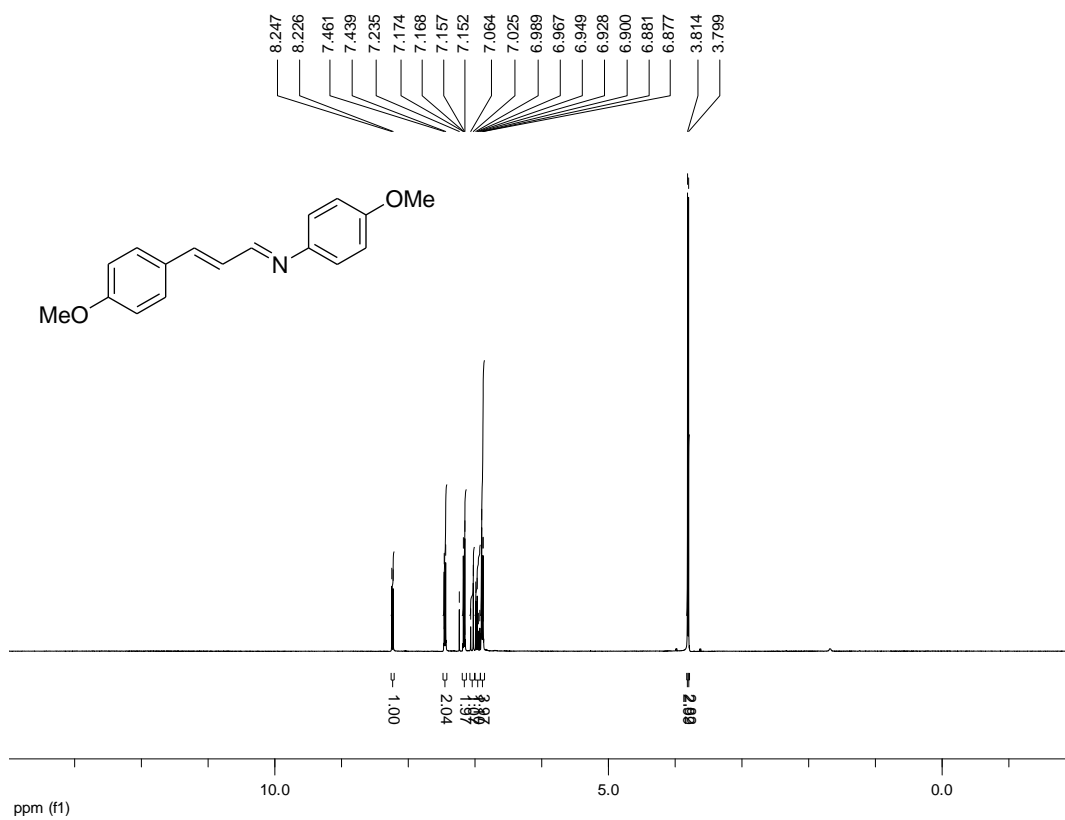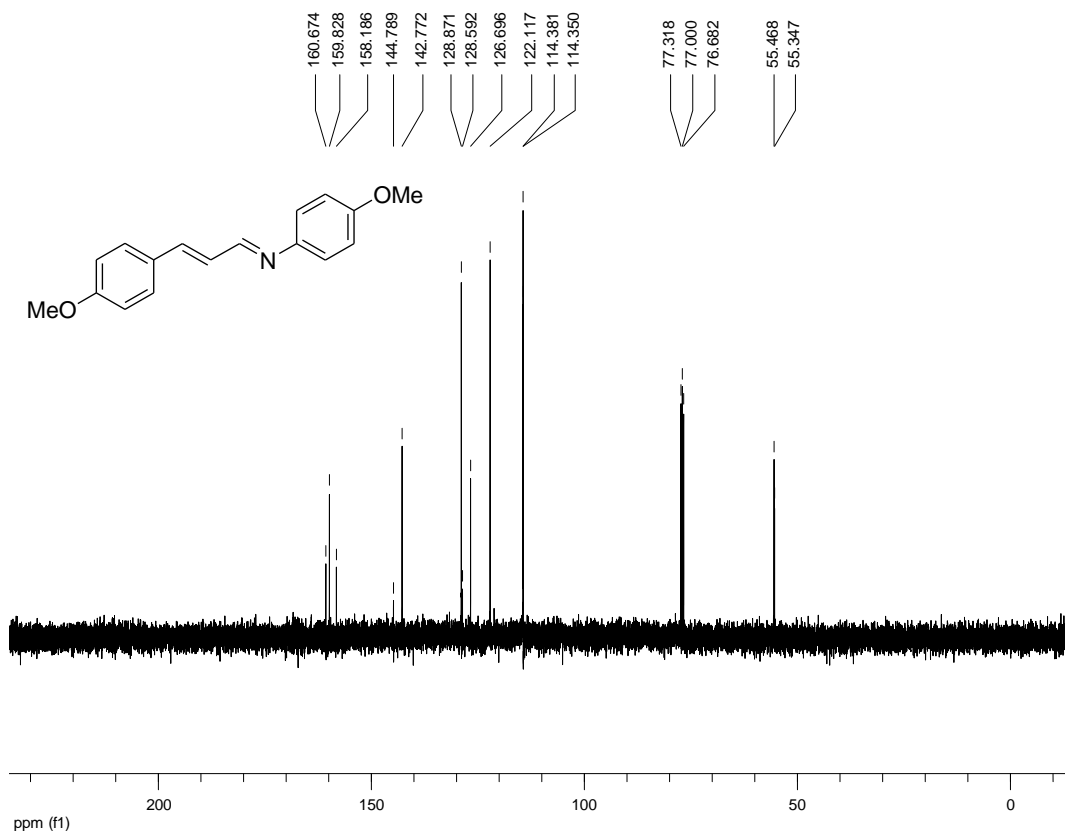

**NMR Spectra of *N*-(4-Methoxycinnamylidene)-4-trifluoromethylaniline**

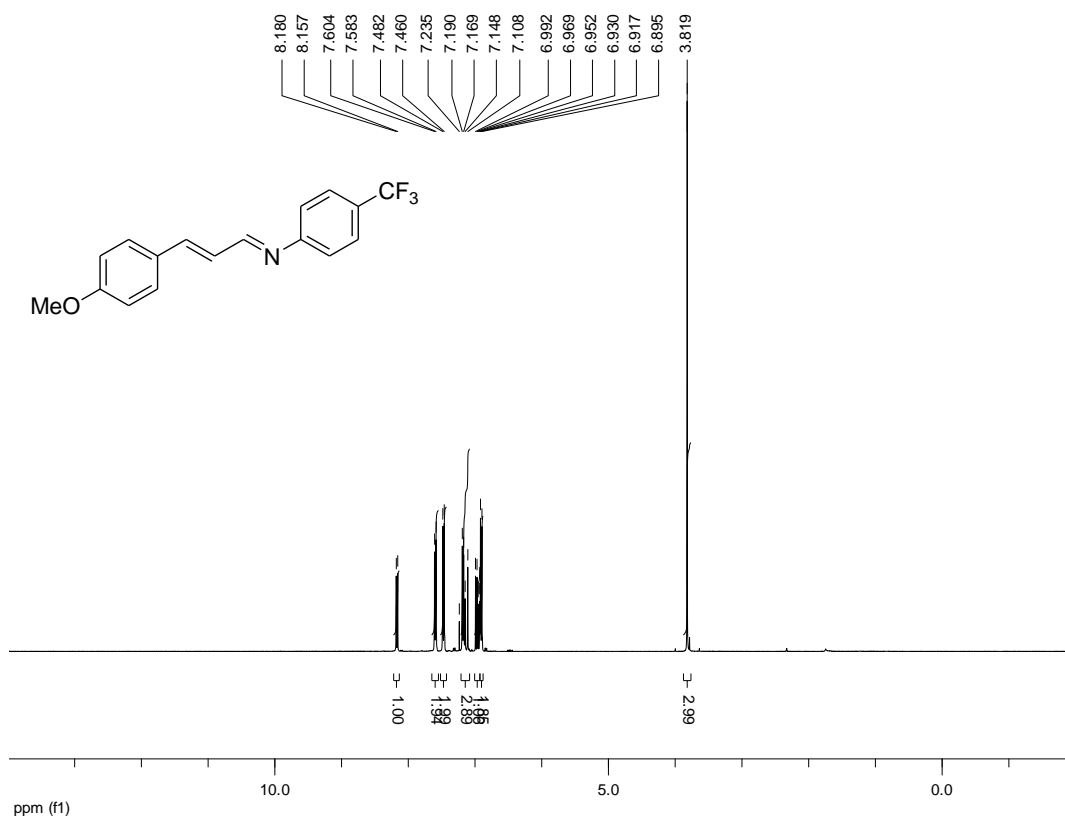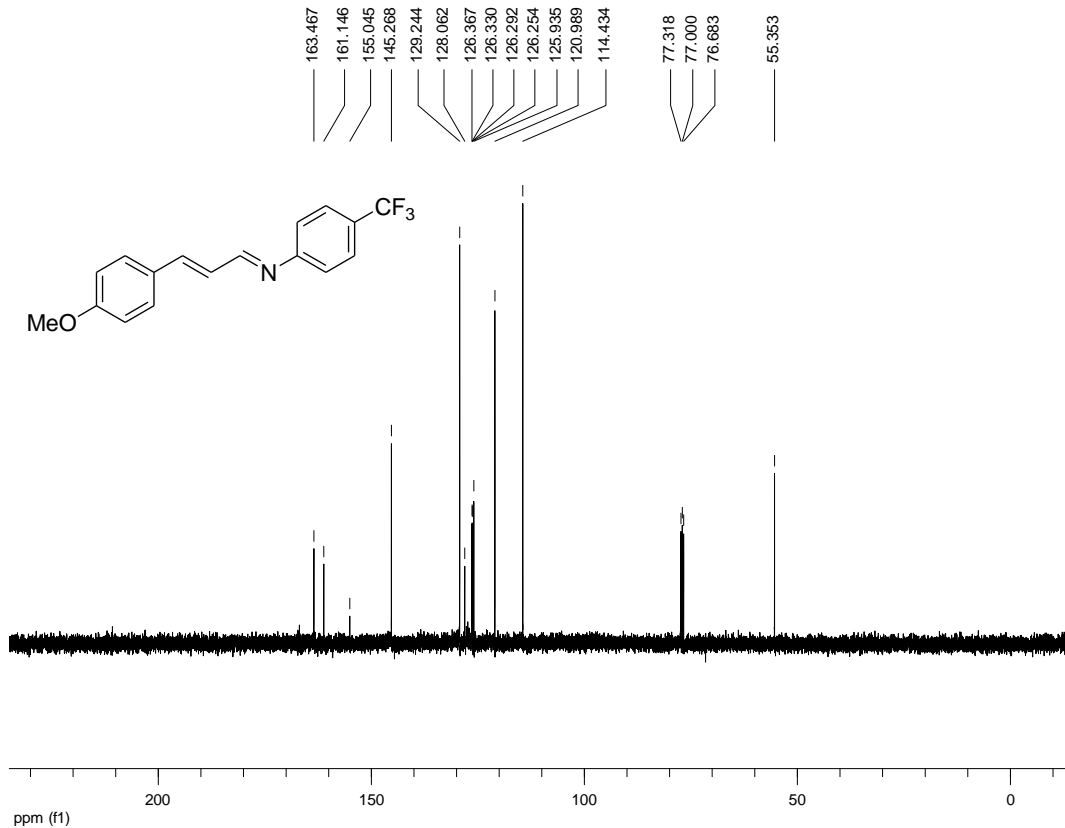

**NMR Spectra of *N*-(4-Methoxycinnamylidene)-4-bromoaniline**

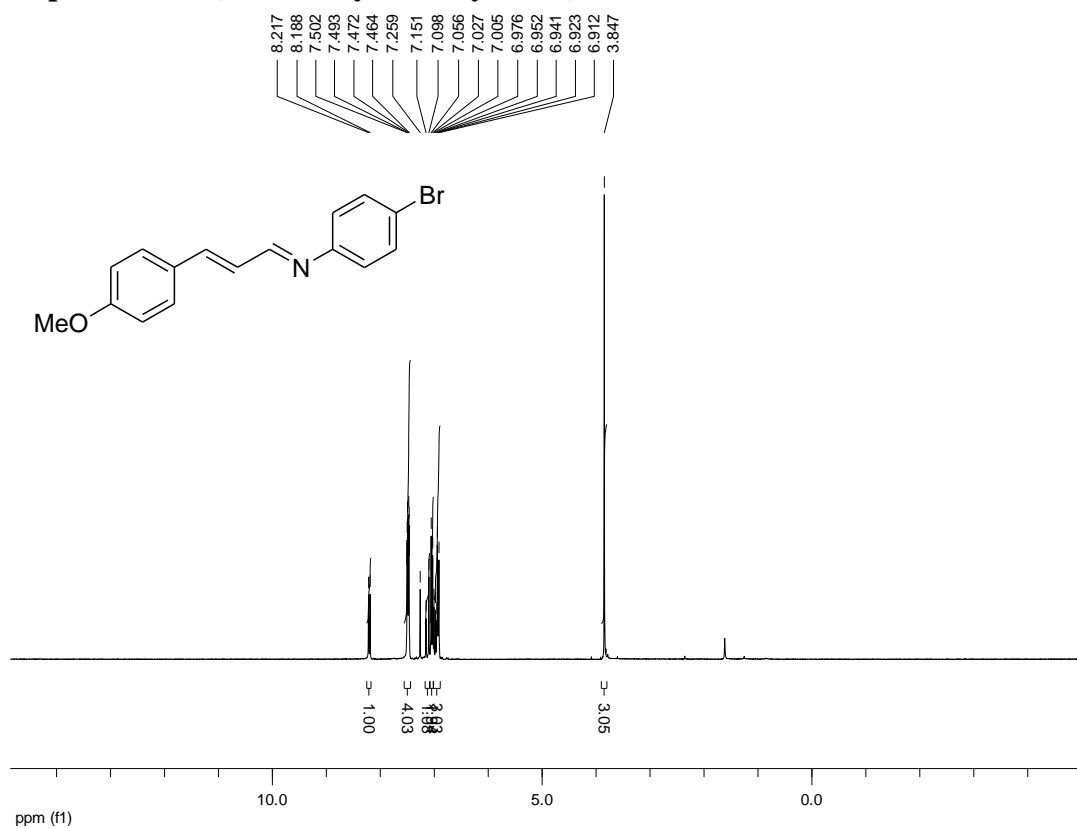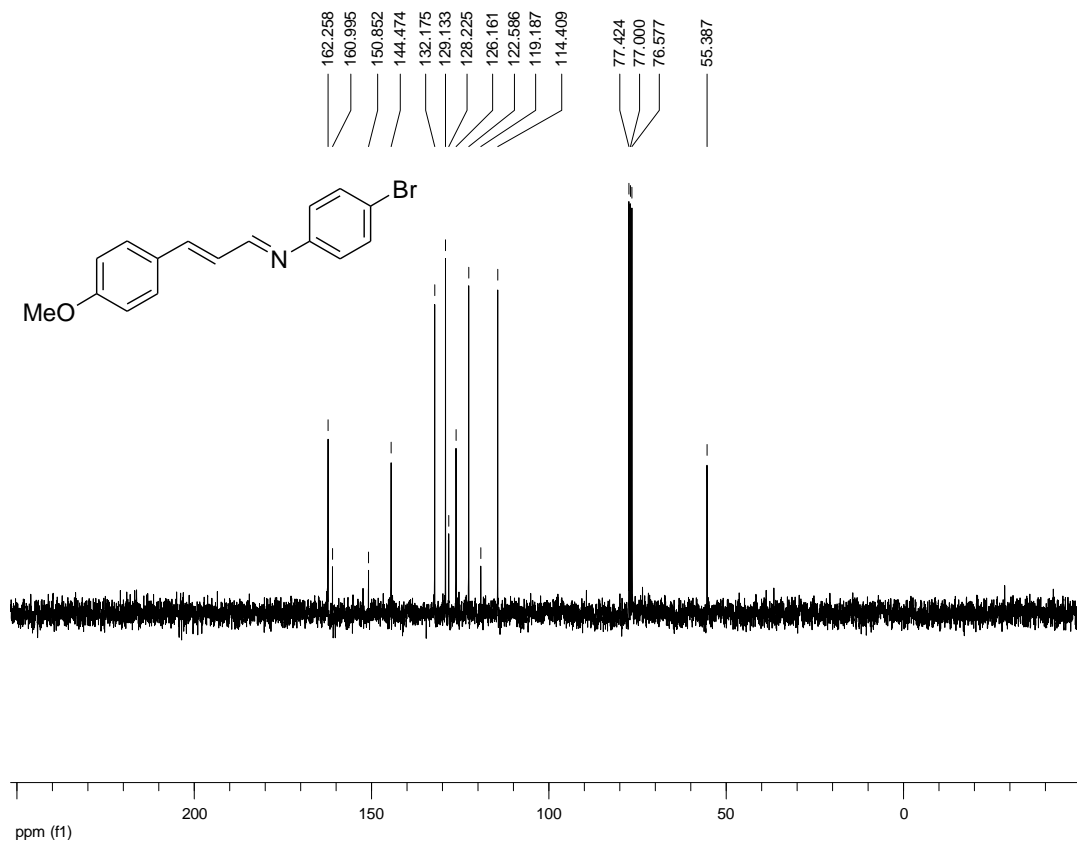

**NMR Spectra of *N*-(4-Methoxycinnamylidene)-4-chloroaniline**

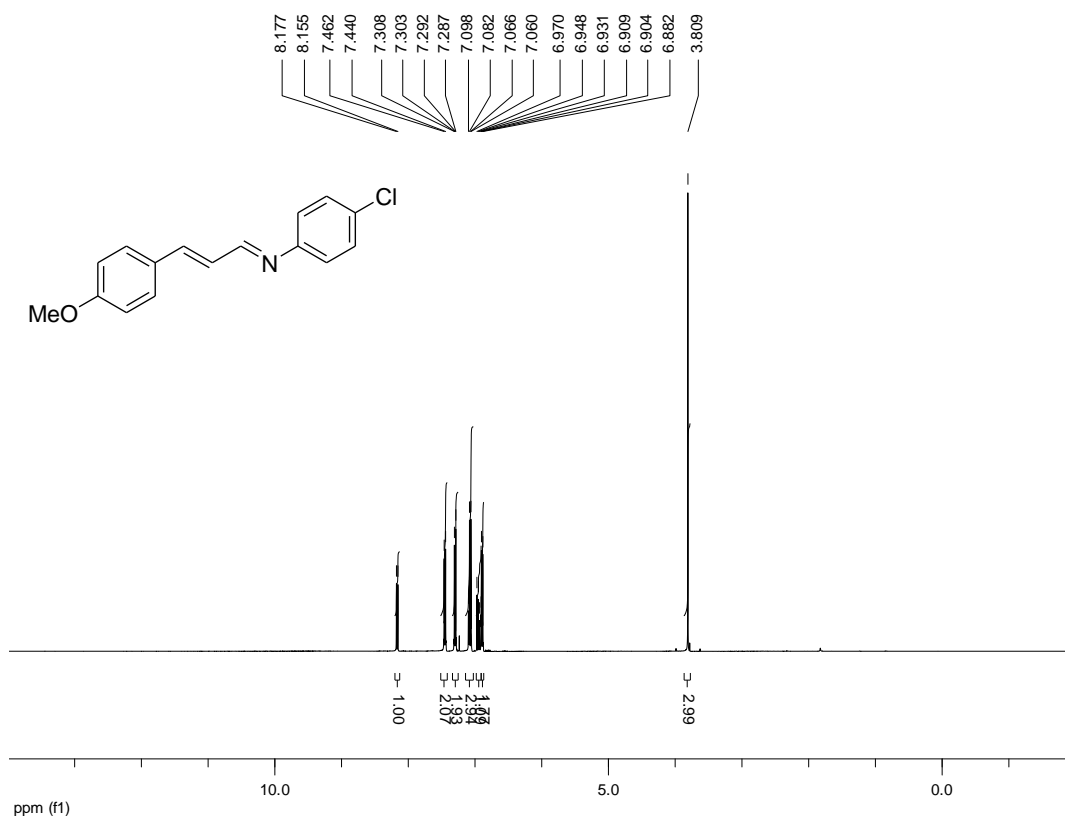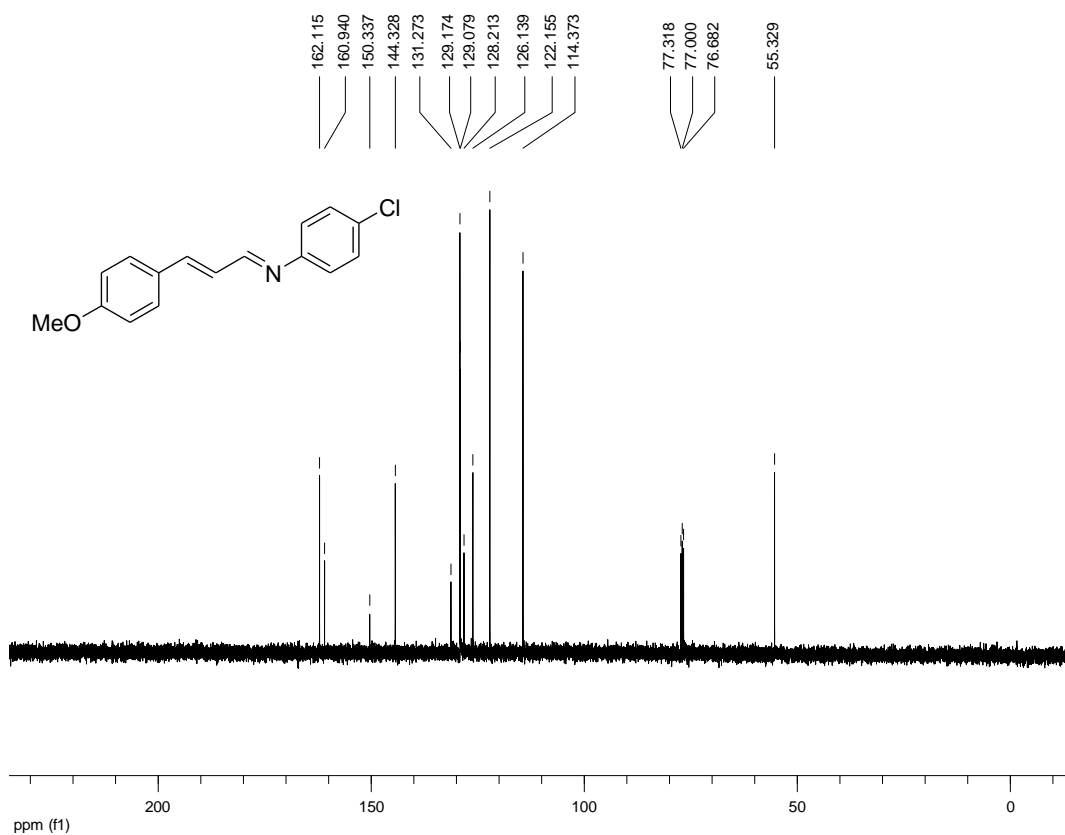

**NMR Spectra of *N*-(4-Methoxycinnamylidene)-3-chloroaniline**

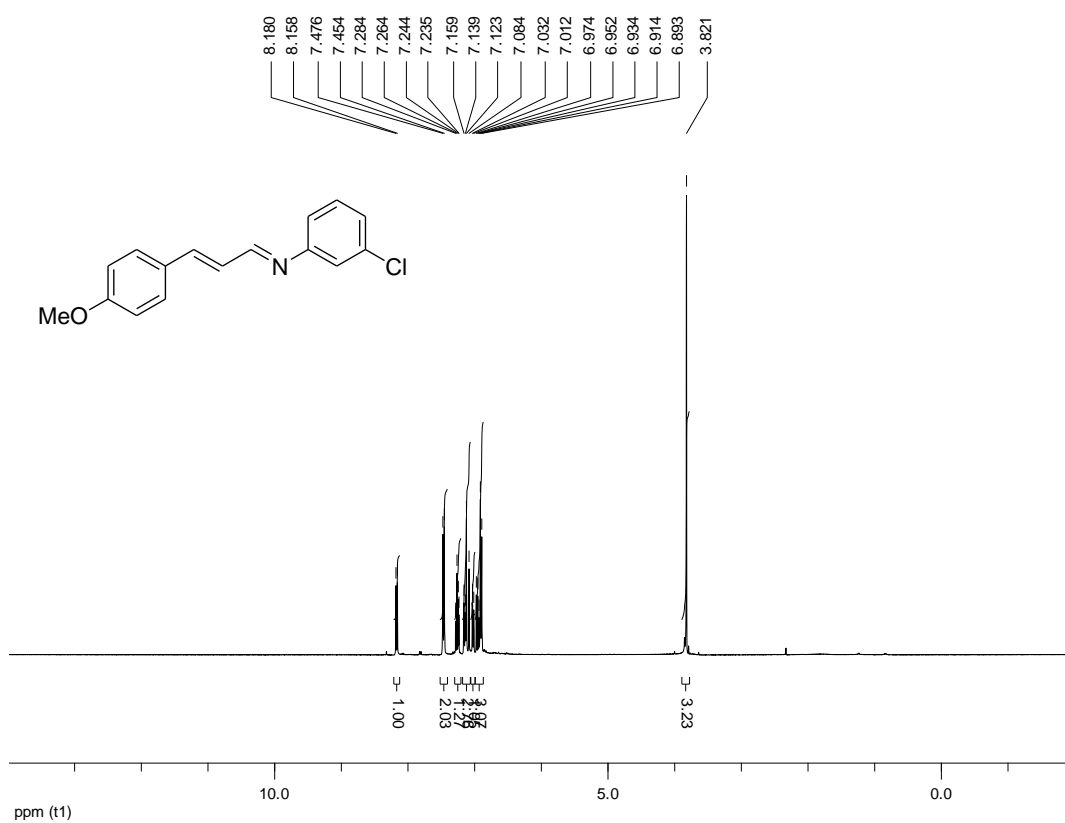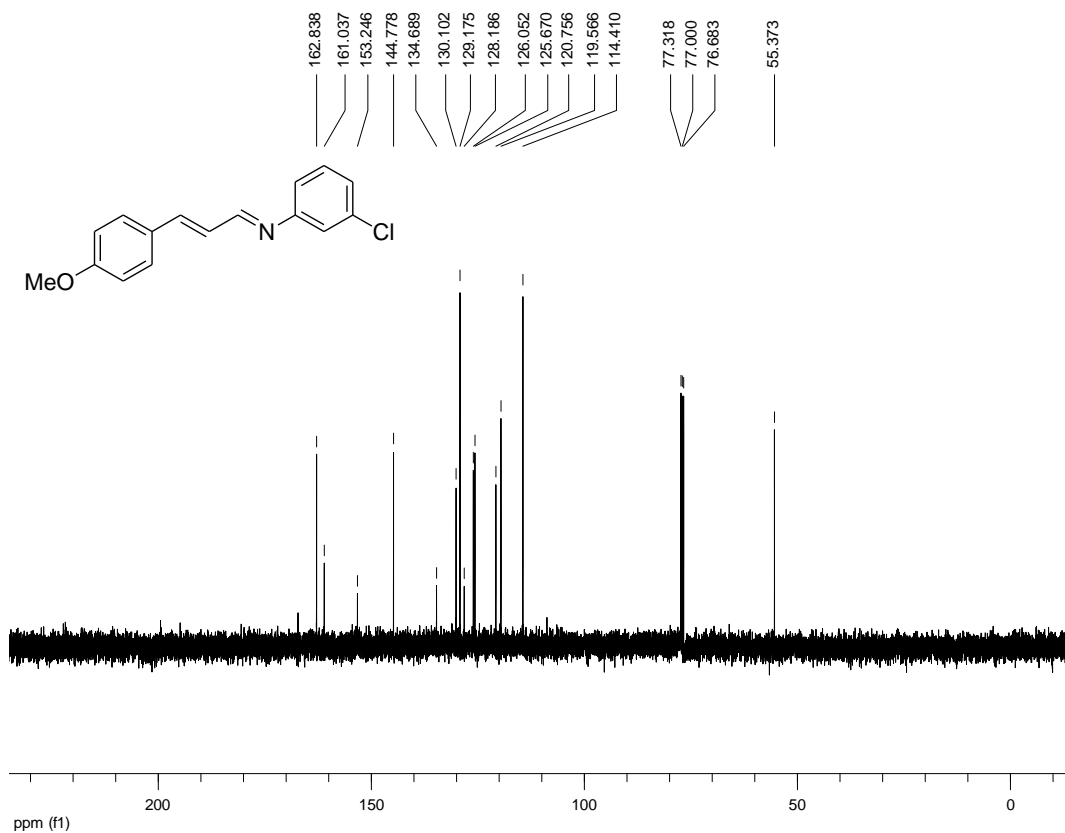



**NMR Spectra of *N*-(4-Nitrocinnamylidene)aniline**

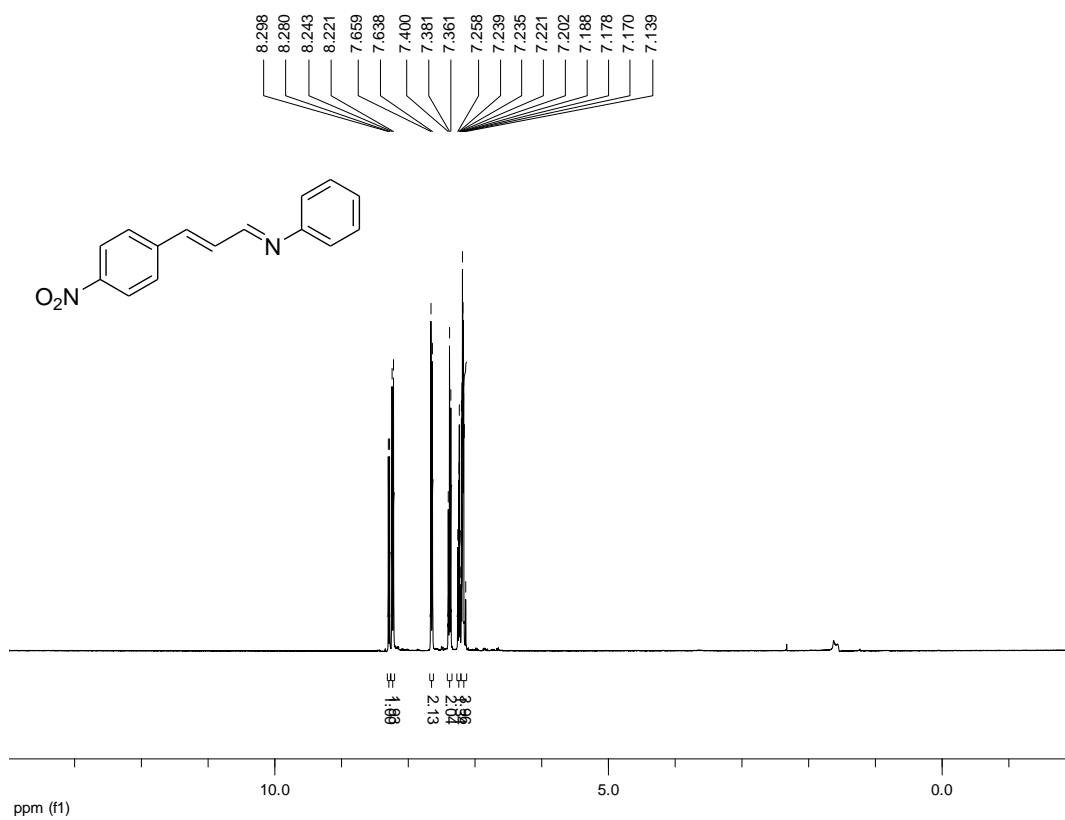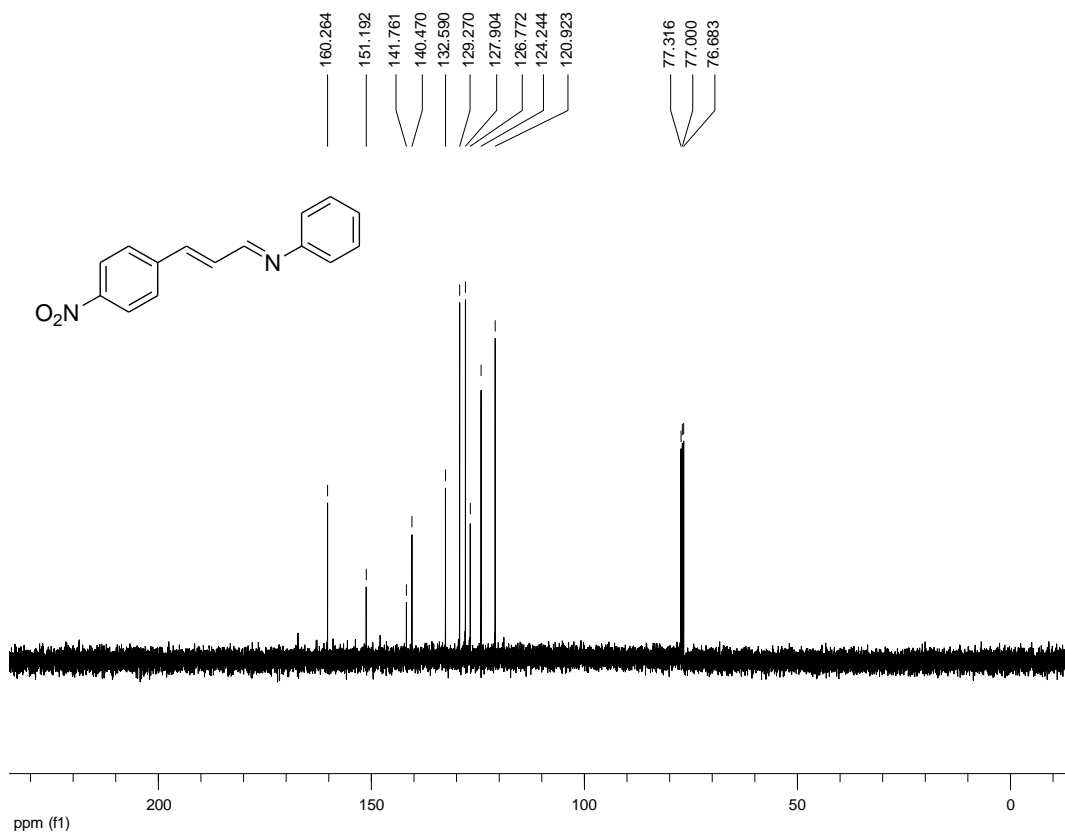

**NMR Spectra of *N*-(4-Methylpent-2-enylidene)aniline**

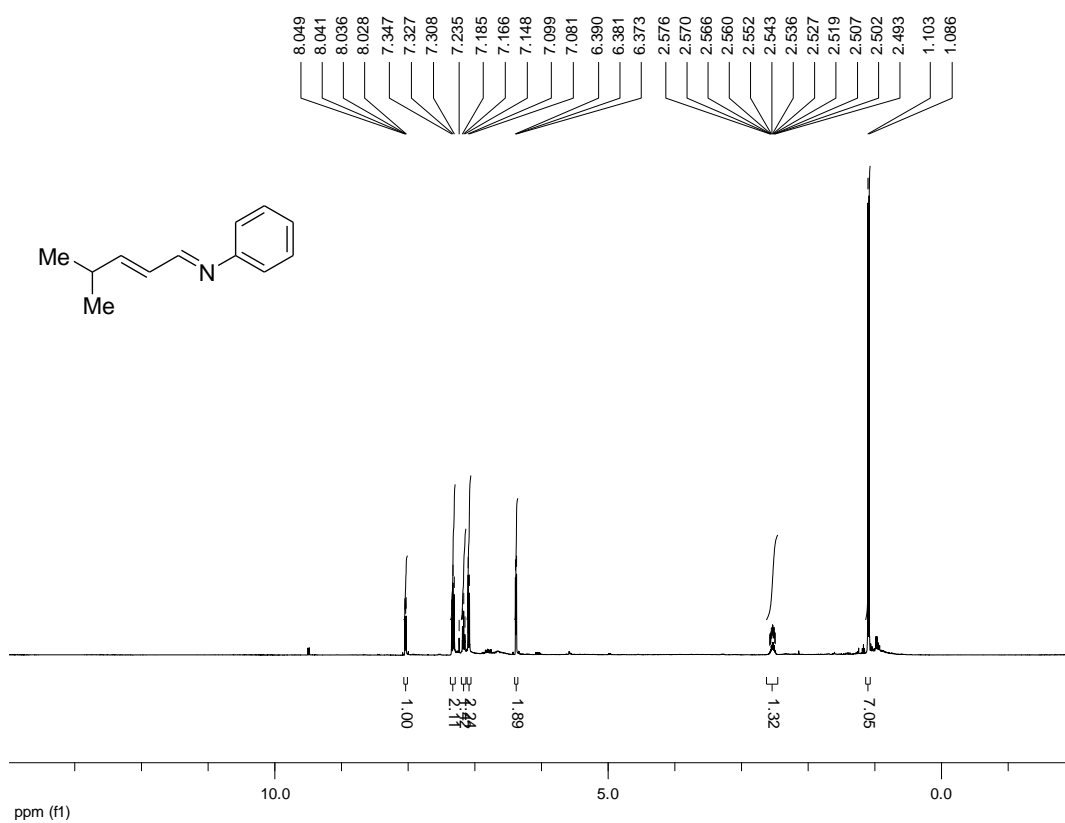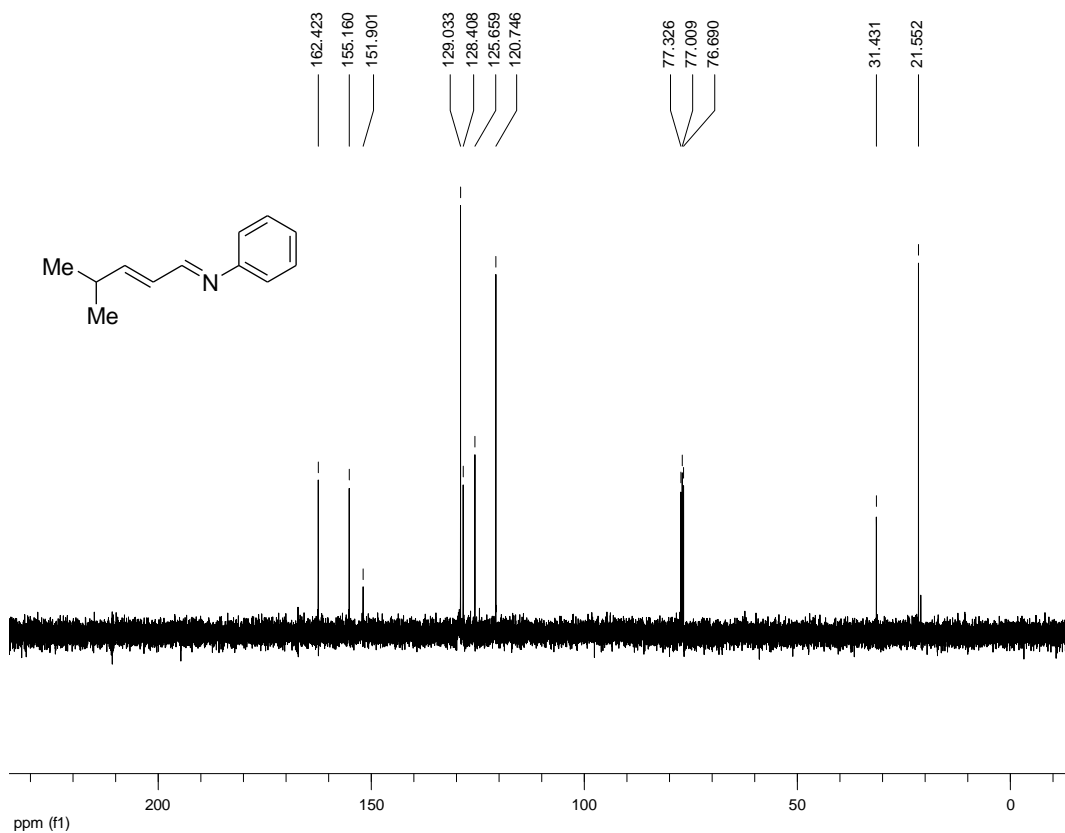



**NMR Spectra of Product 3a**

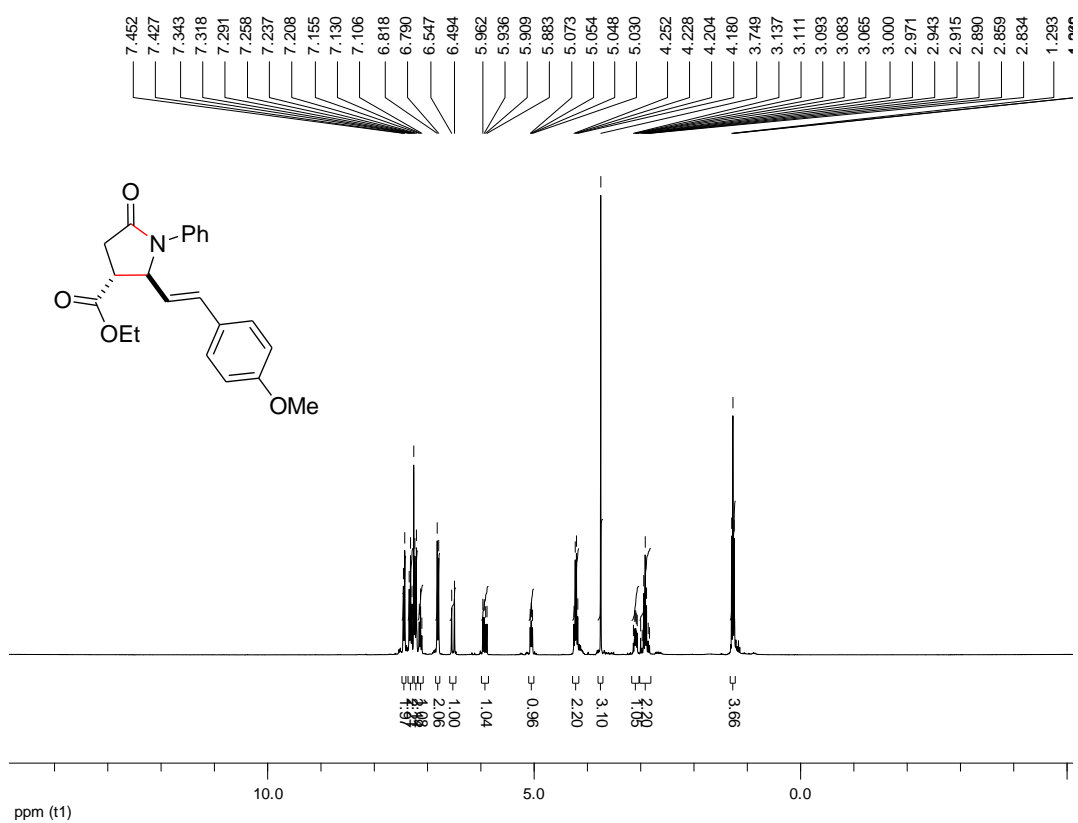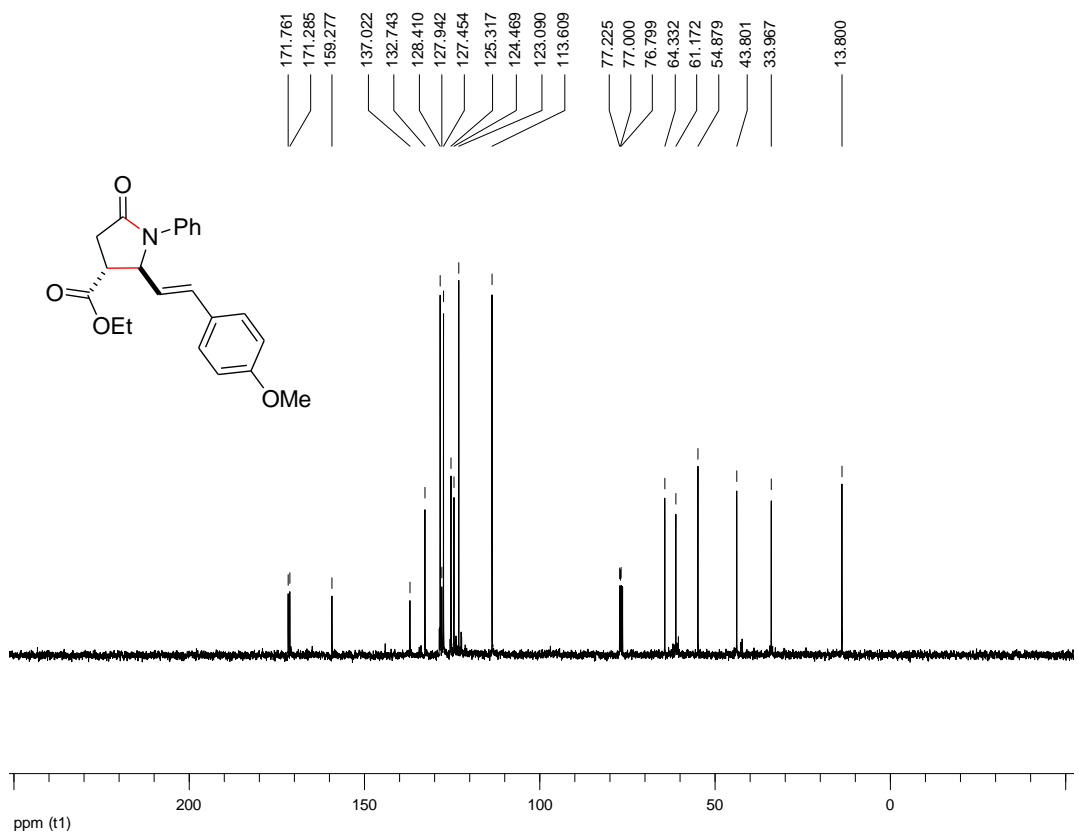

**<sup>1</sup>H NMR Spectrum of Acid I from Product 3a**

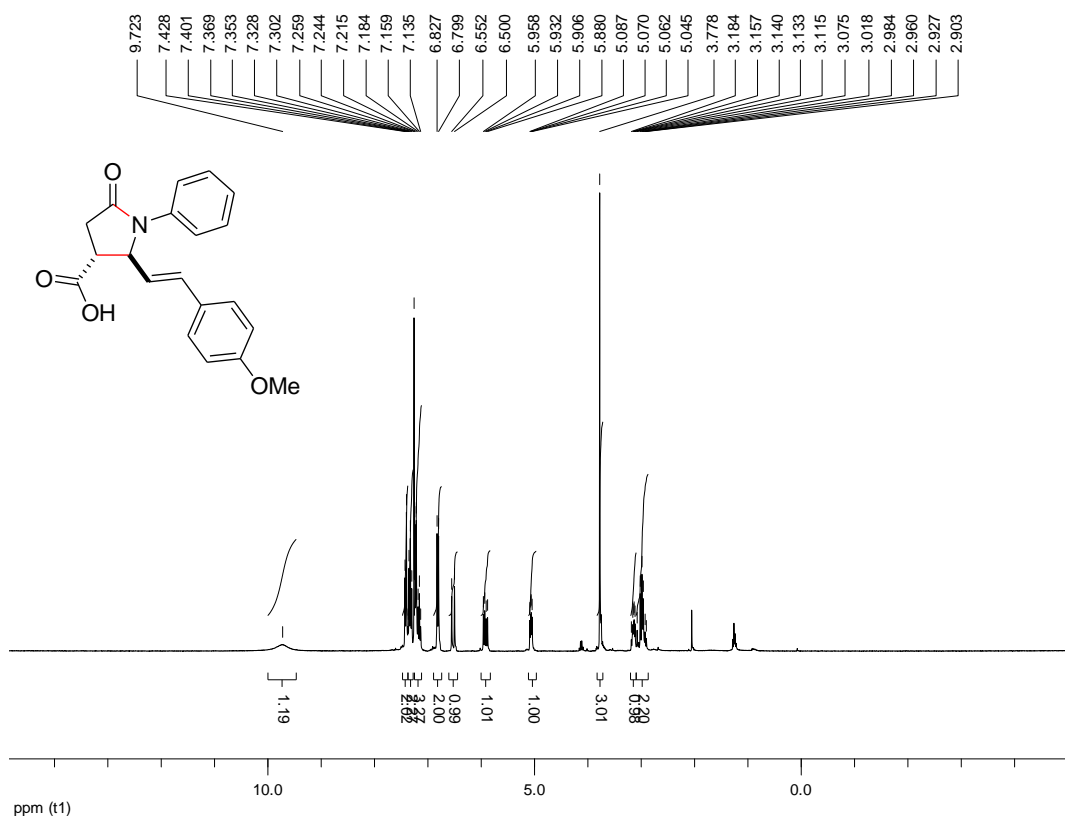

**<sup>1</sup>H NMR Spectrum of Crude Counterion II**

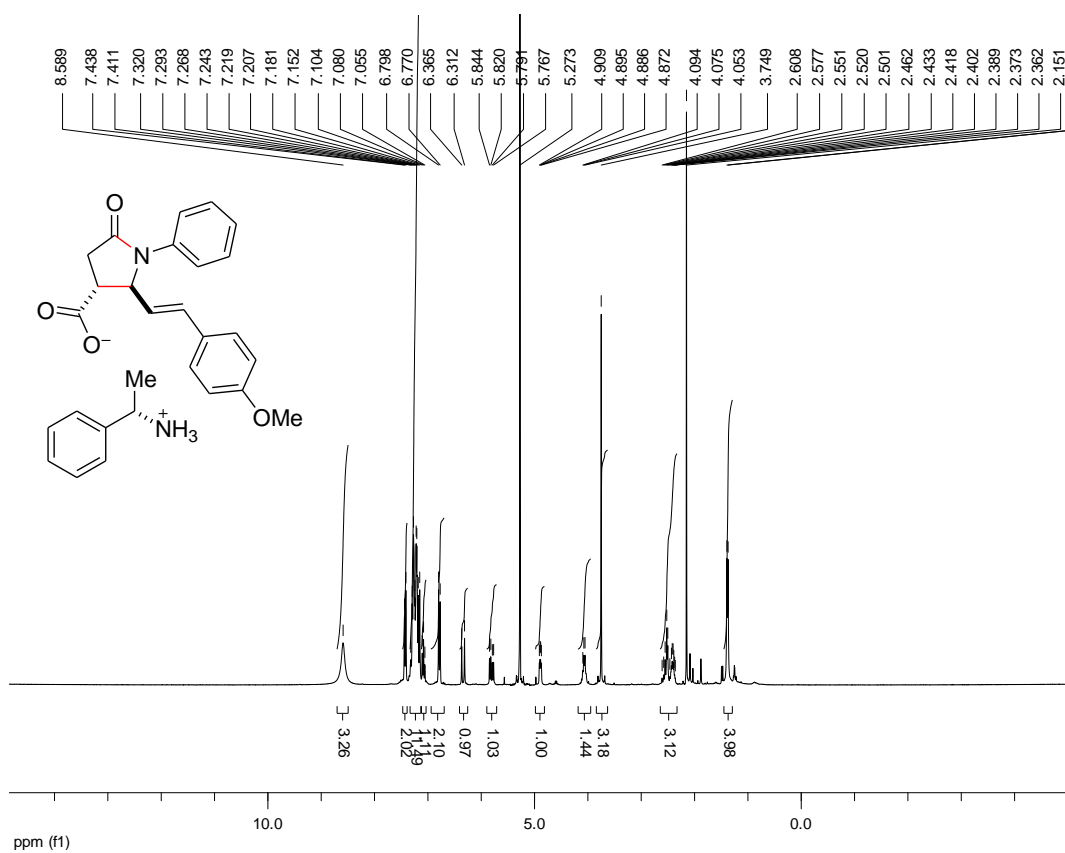

**NMR Spectra of Product 3b**

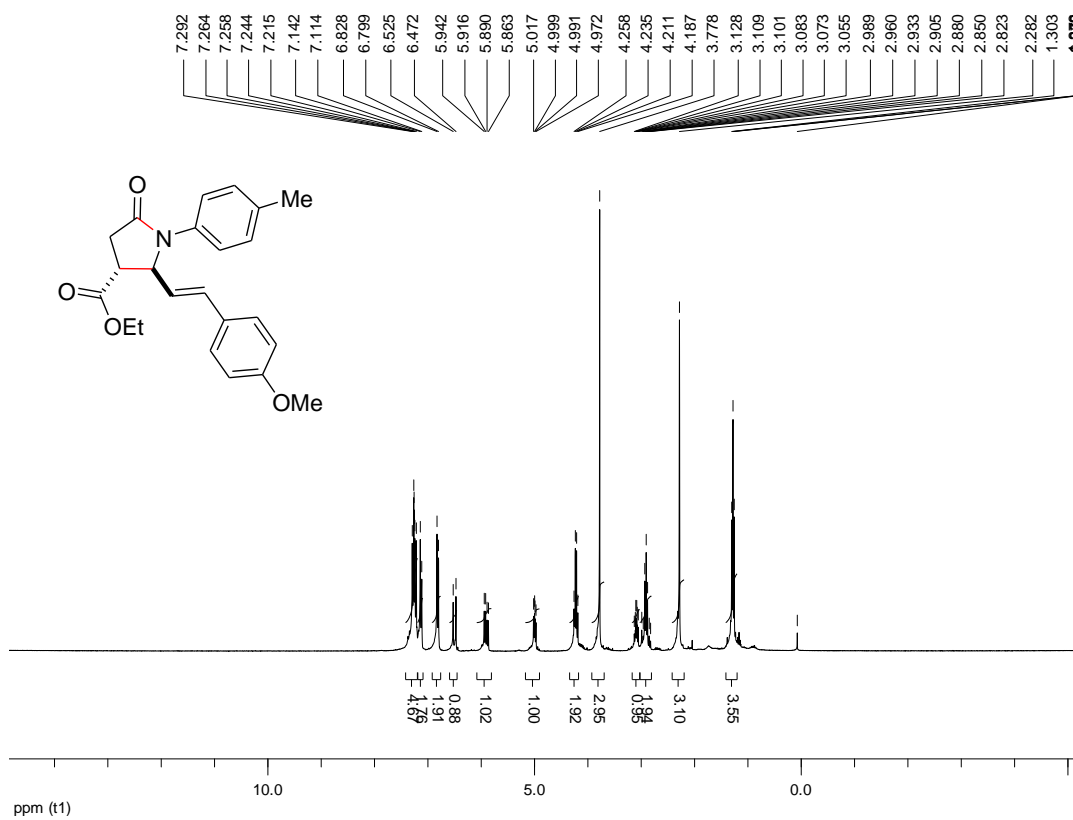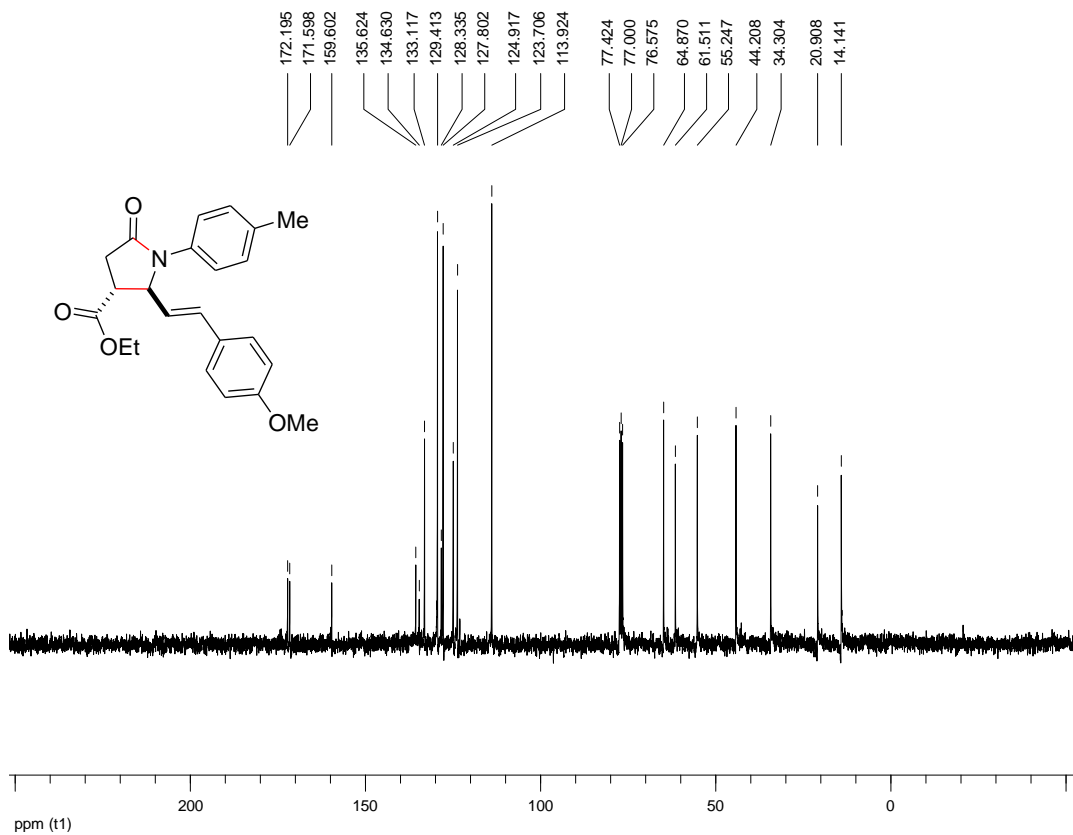

**NMR Spectra of Product 3c**

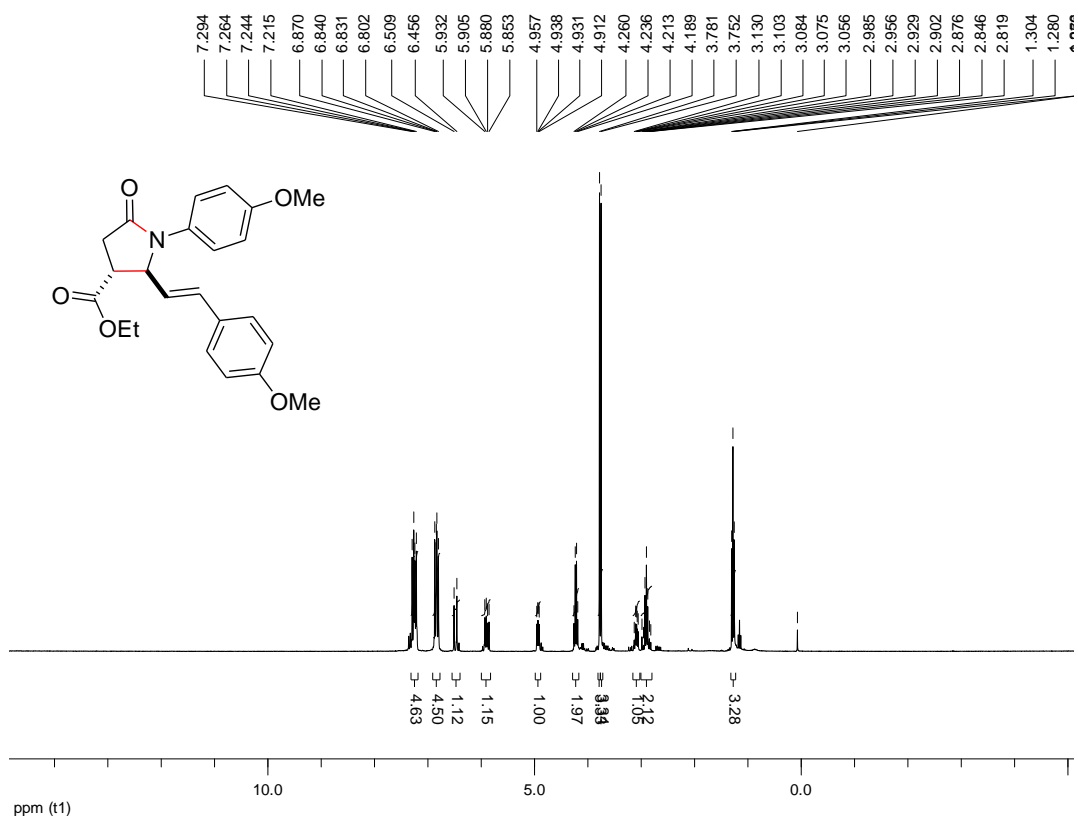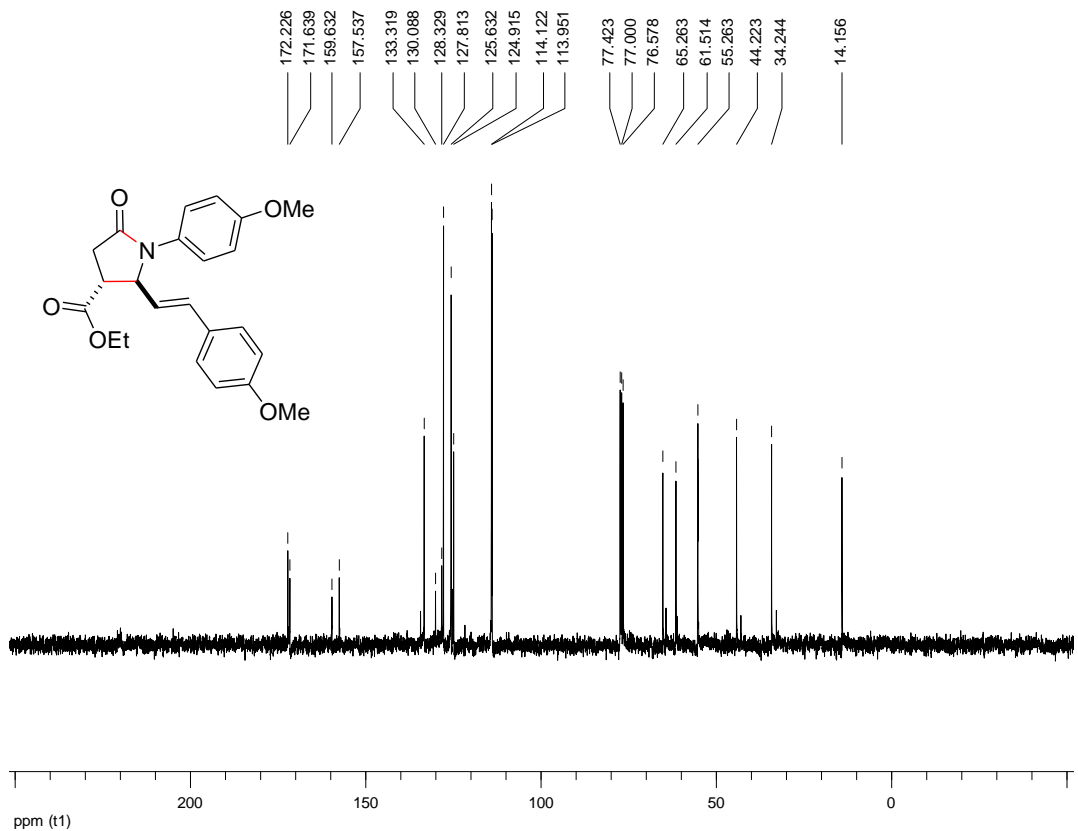

**NMR Spectra of Product 3d**

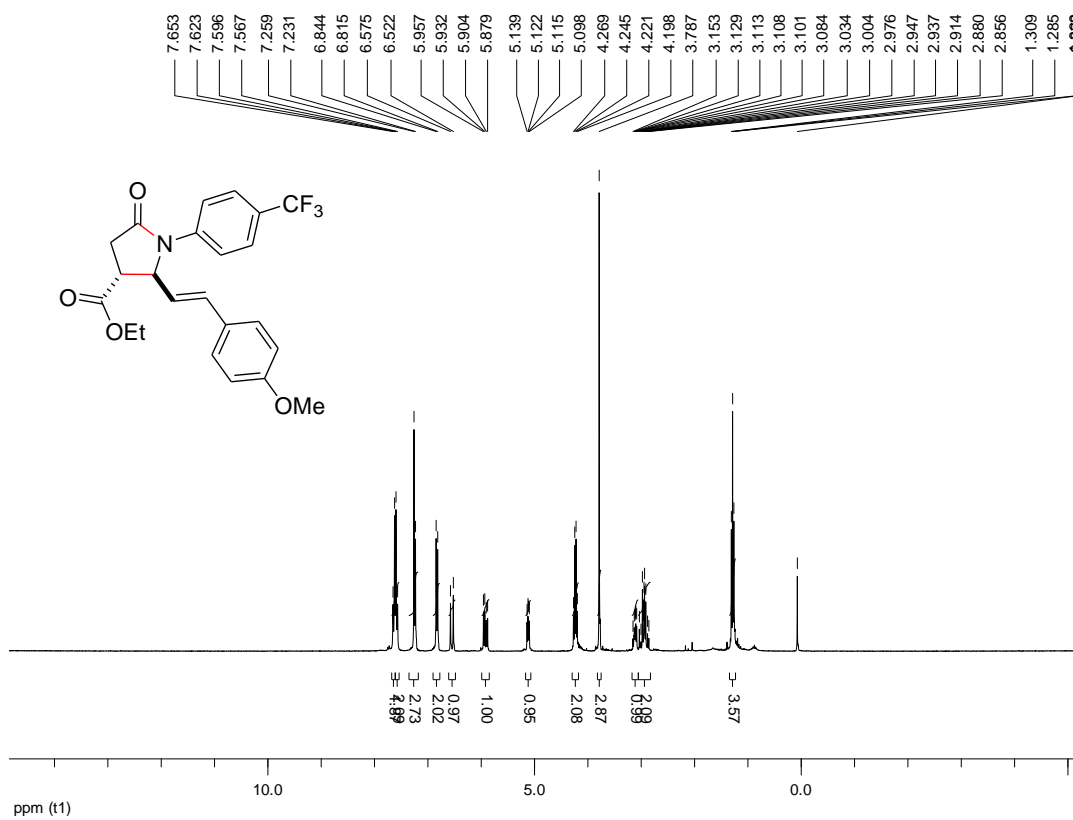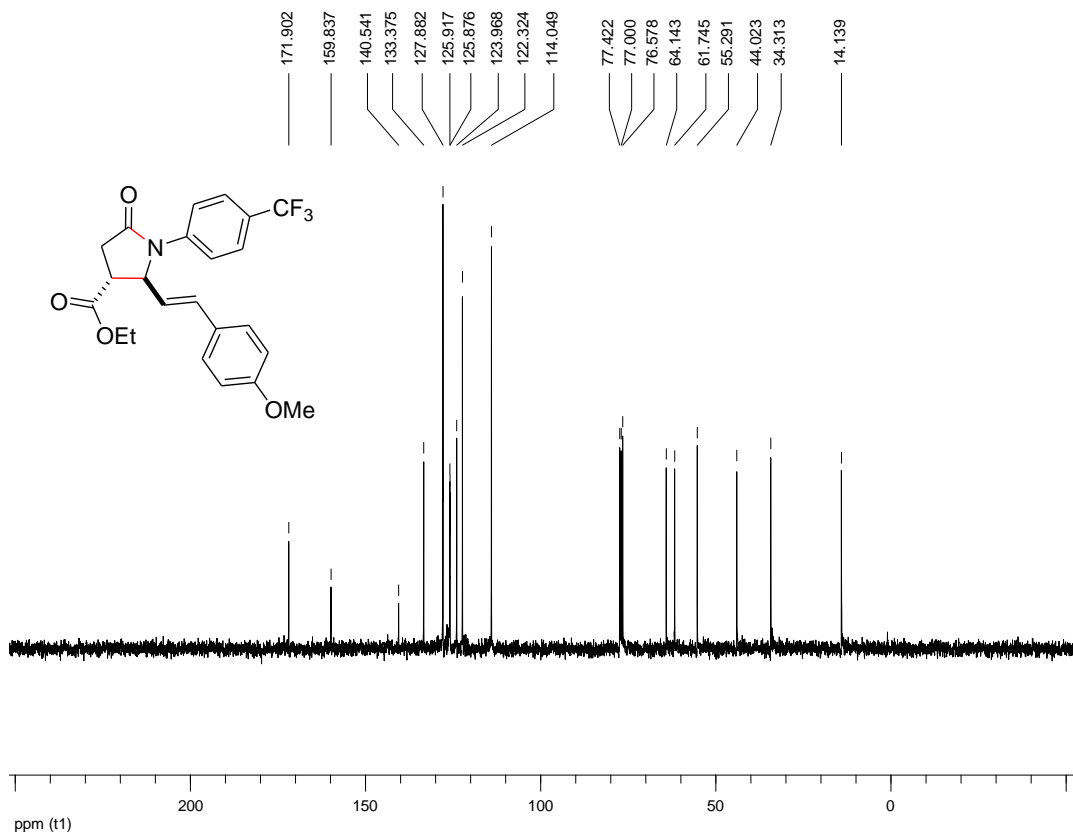

**NMR Spectra of Product 3e**

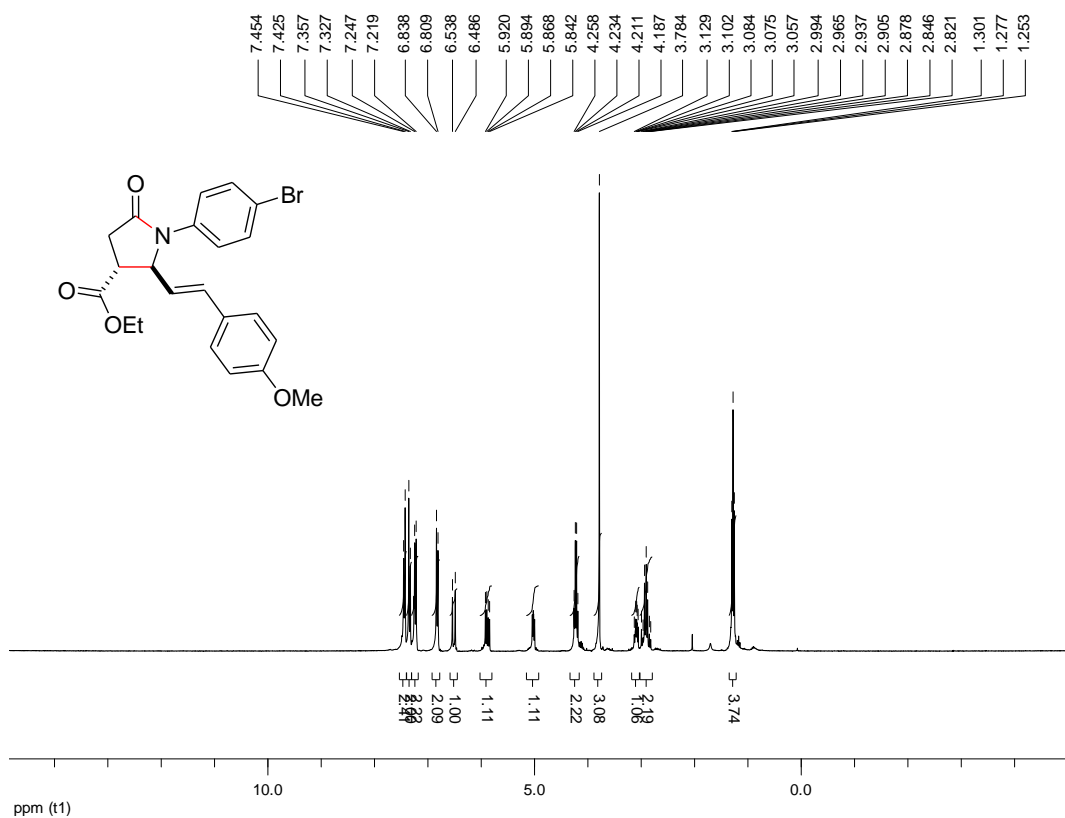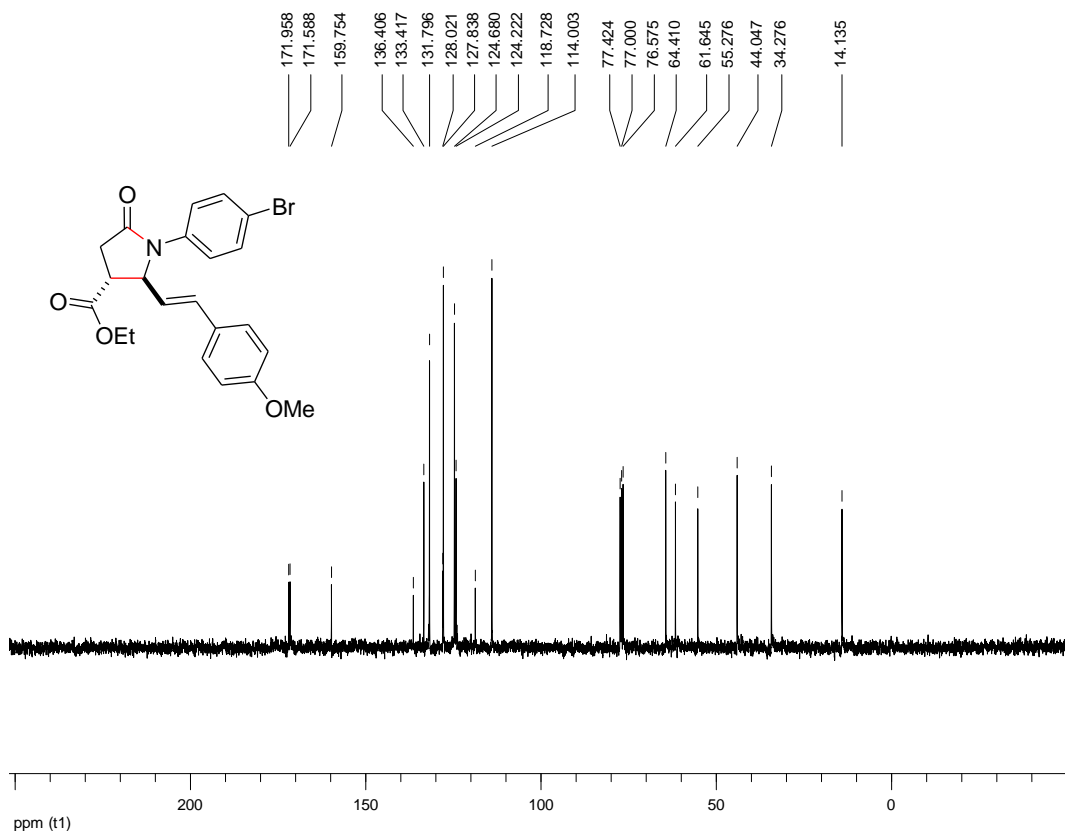

**NMR Spectra of Product 3f**

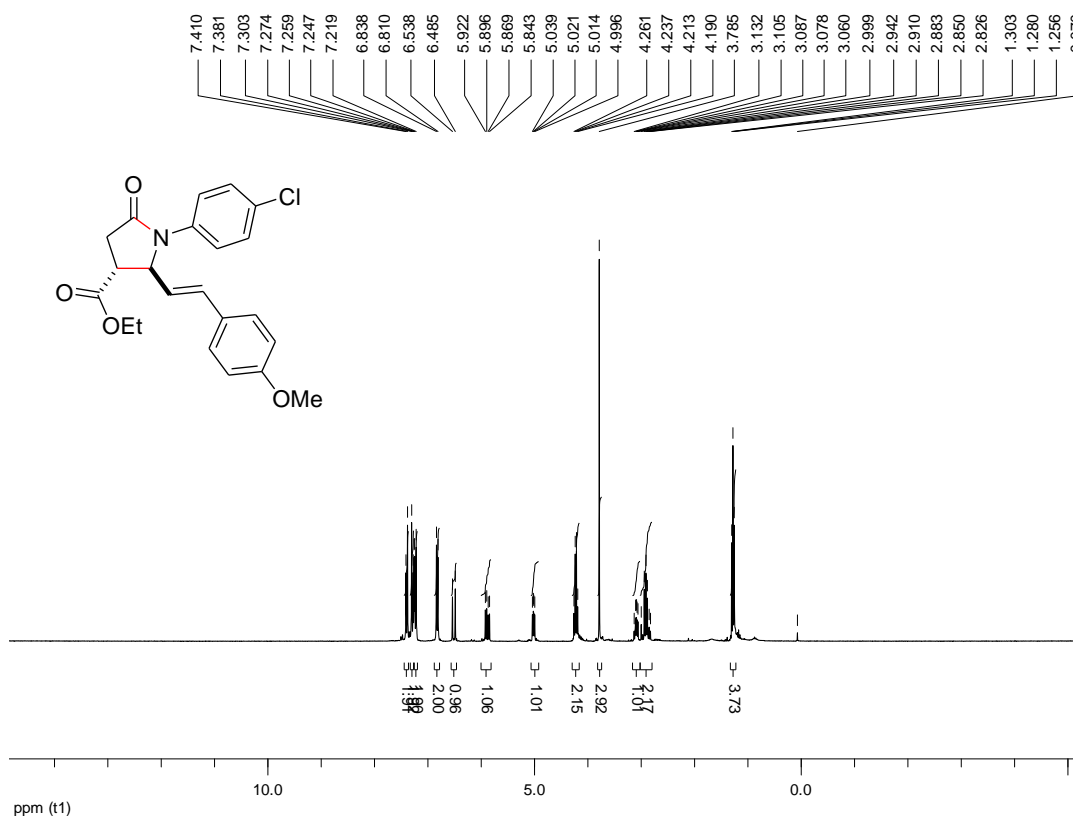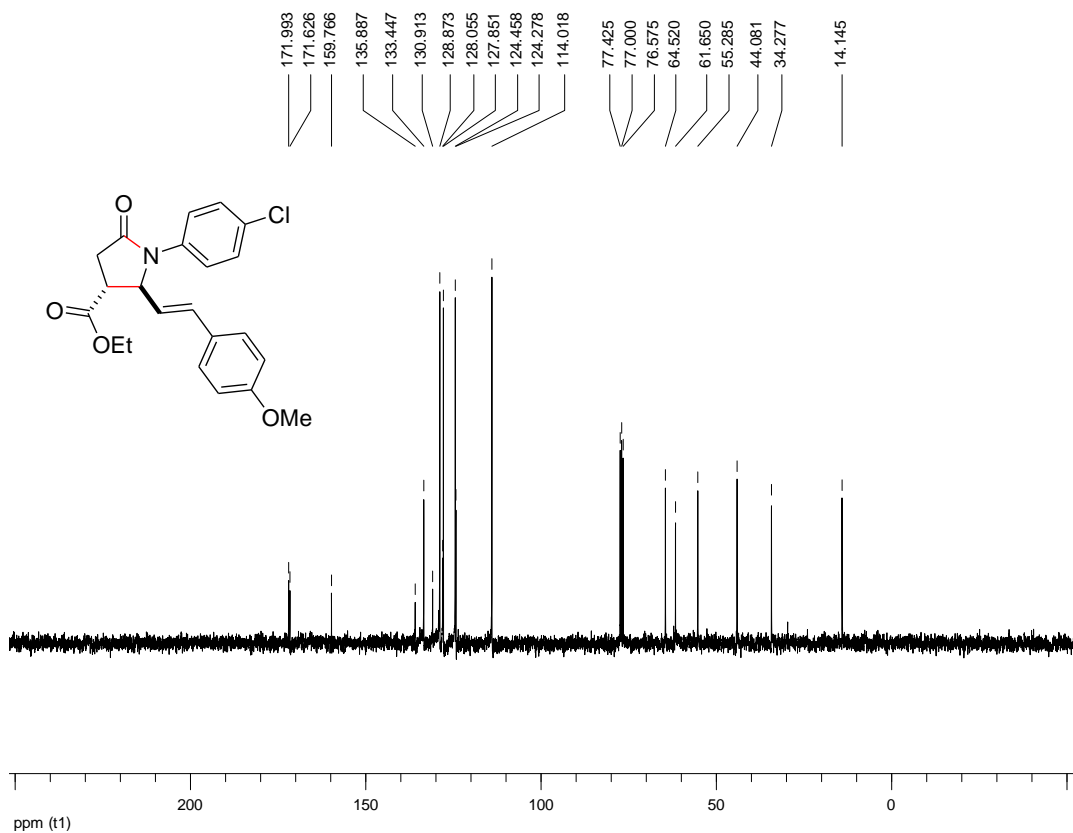

**NMR Spectra of Product 3g**

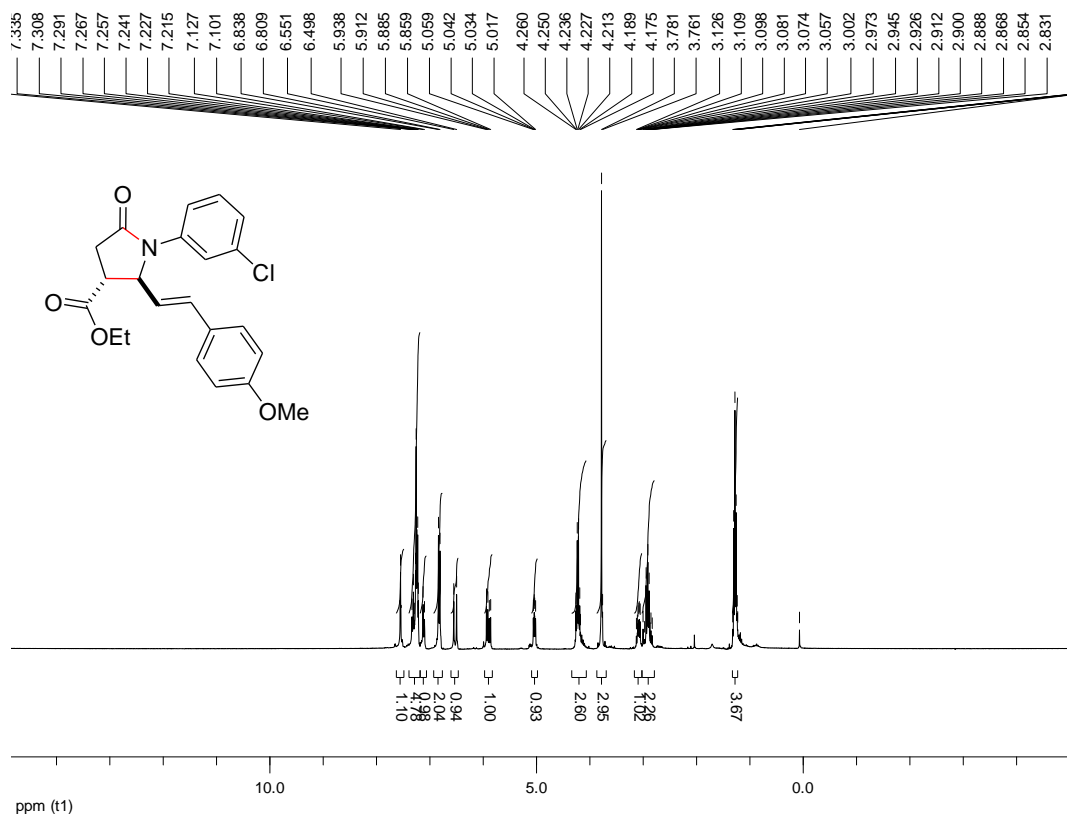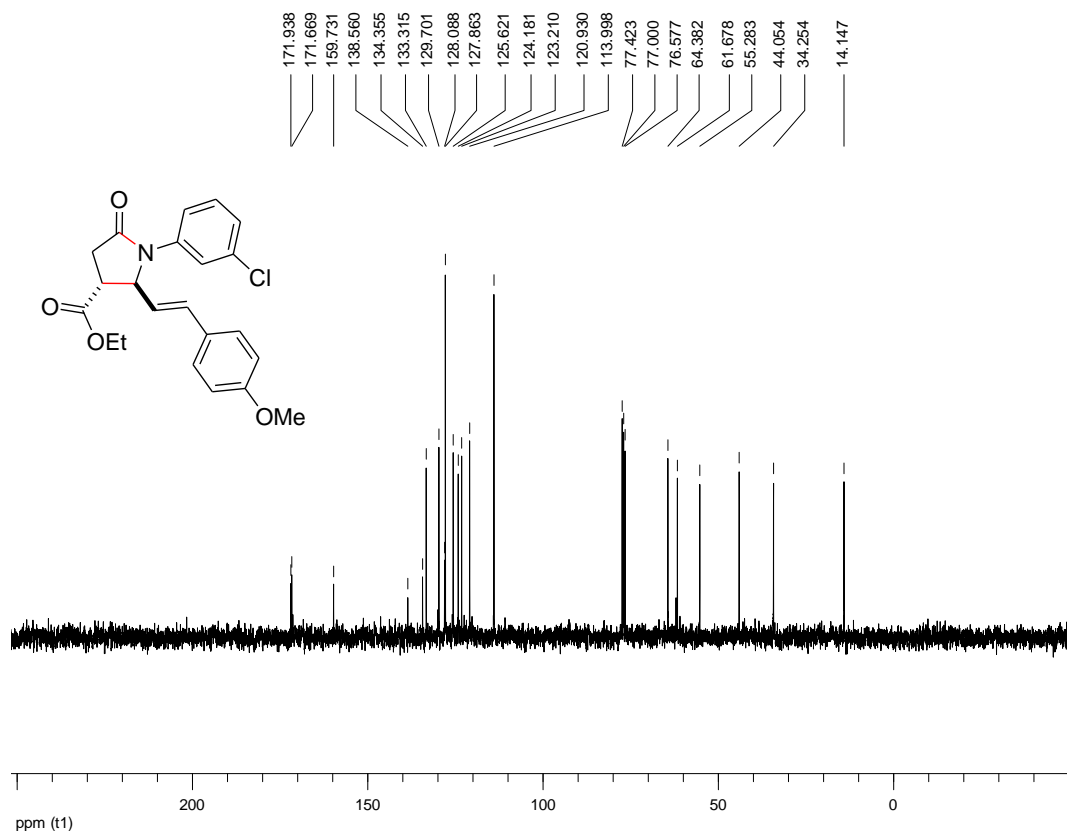



**NMR Spectra of Product 3h**

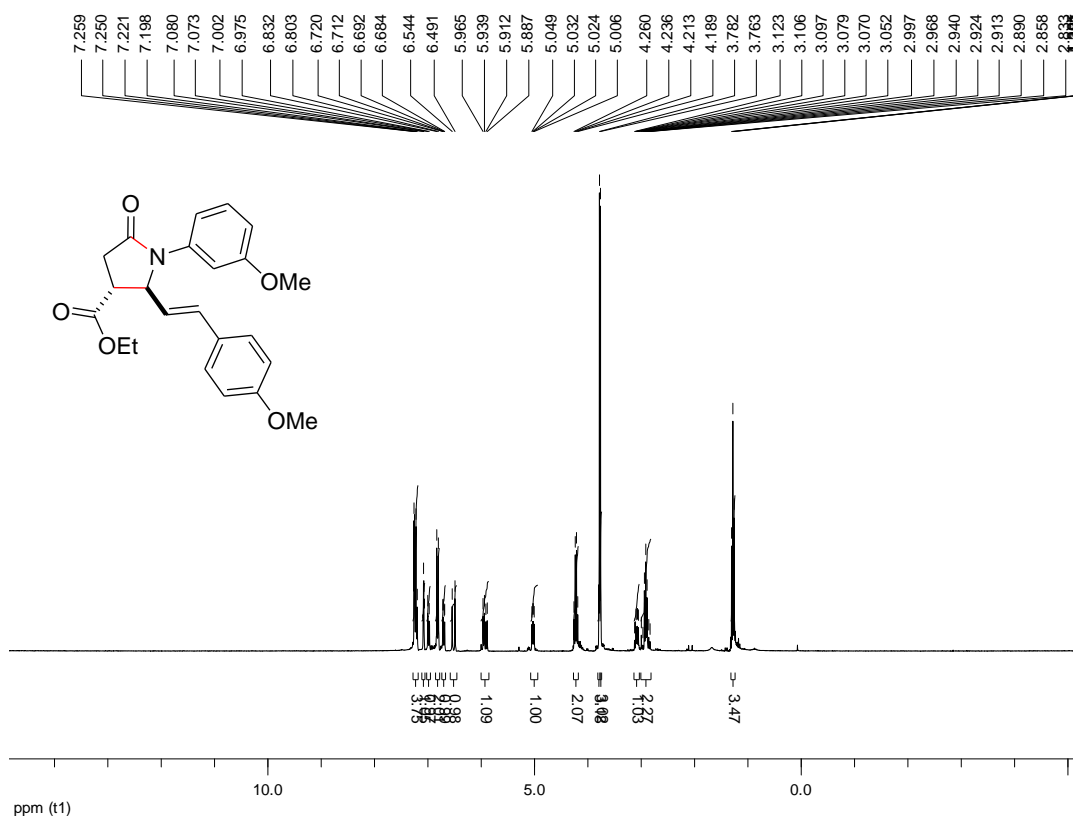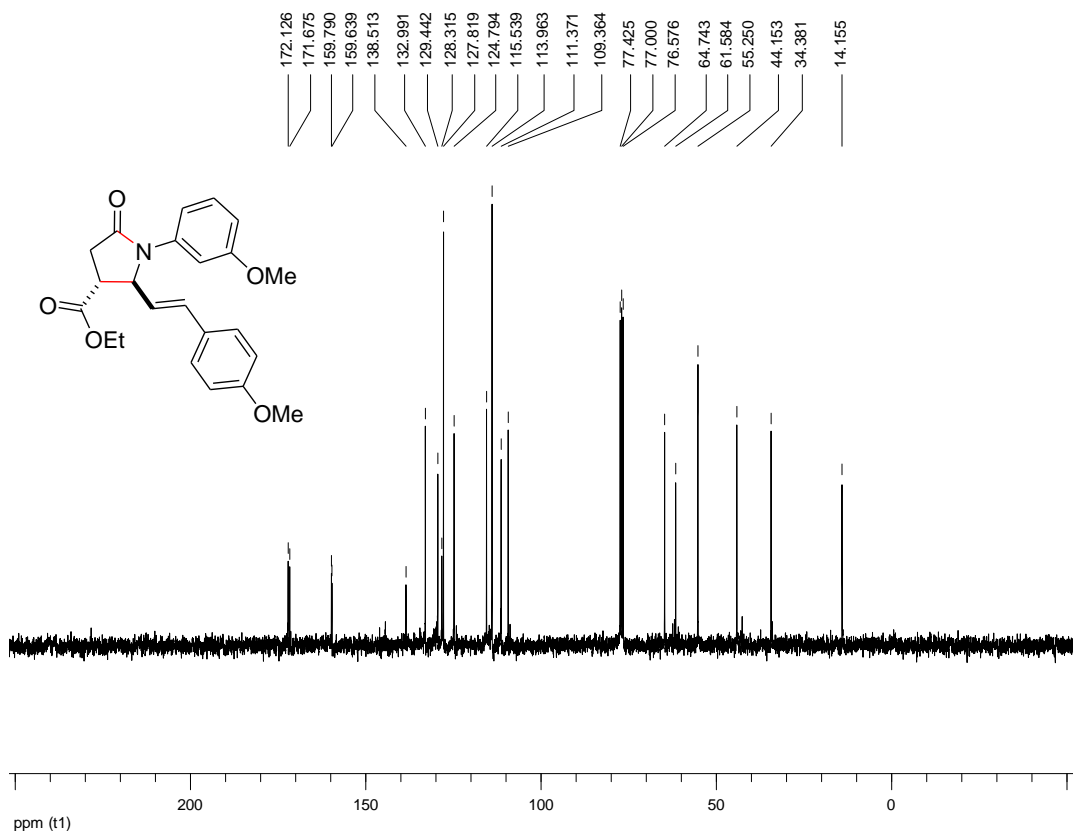

**NMR Spectra of Product 3i**

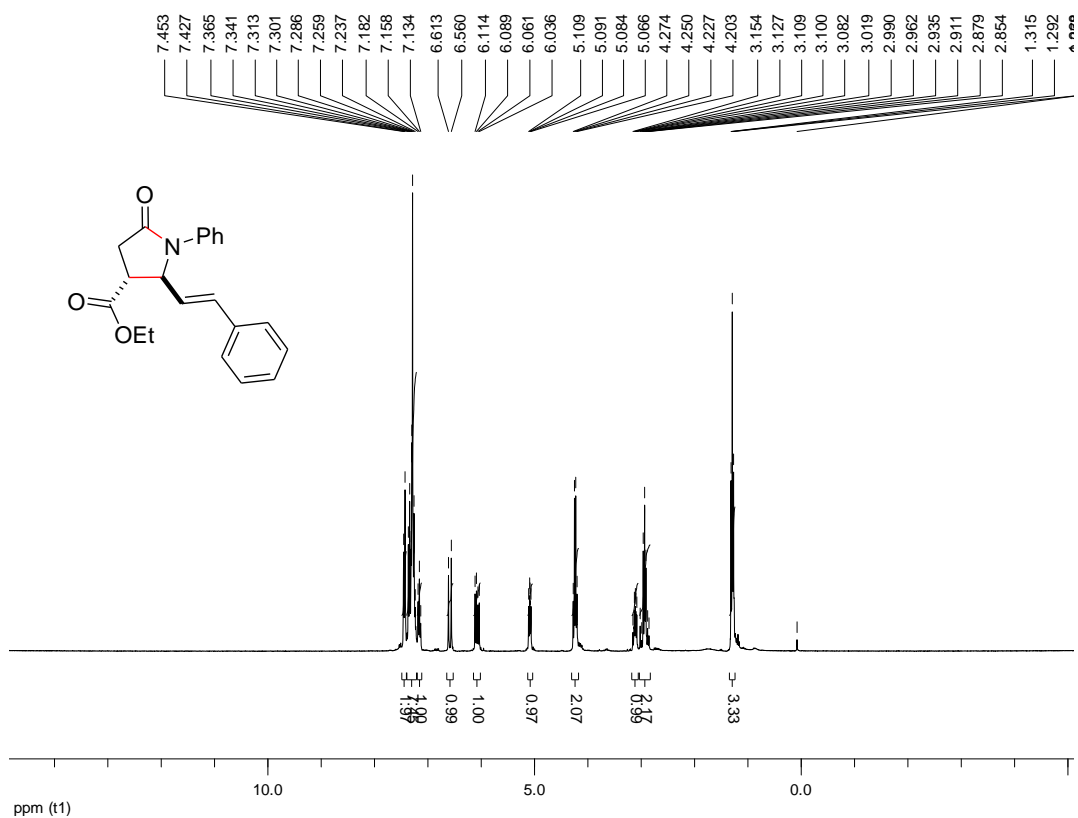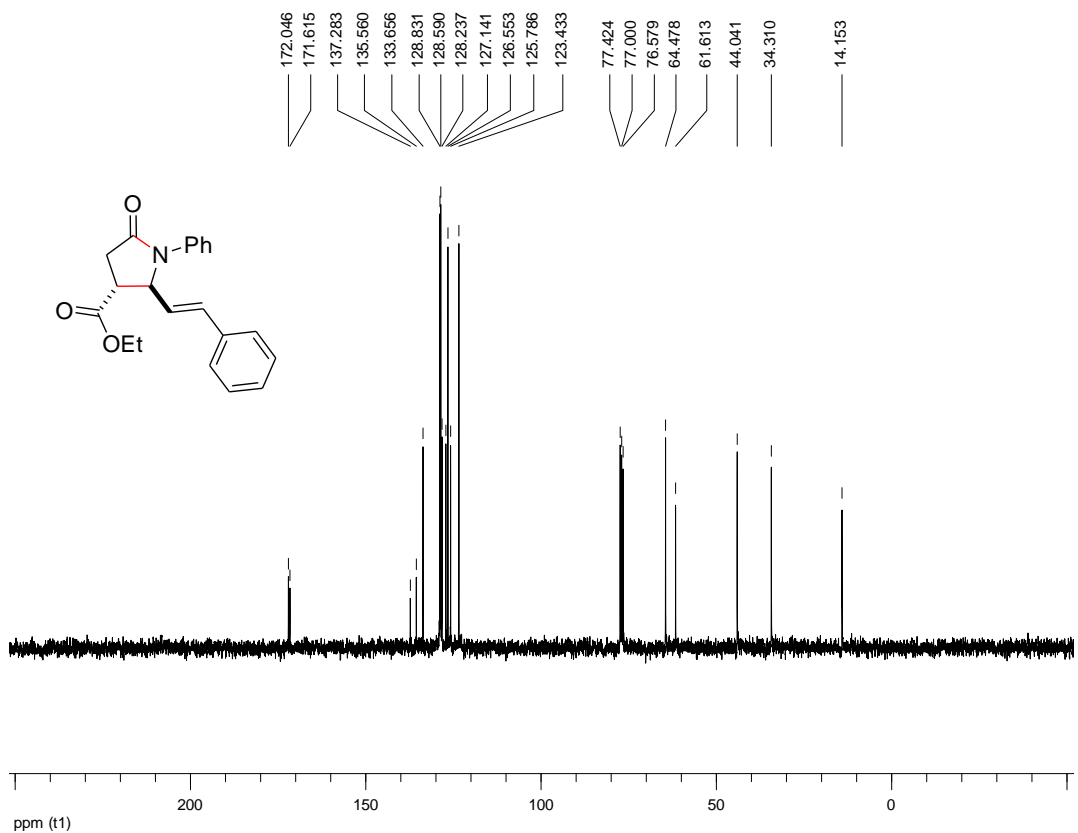

**NMR Spectra of Product 3j**

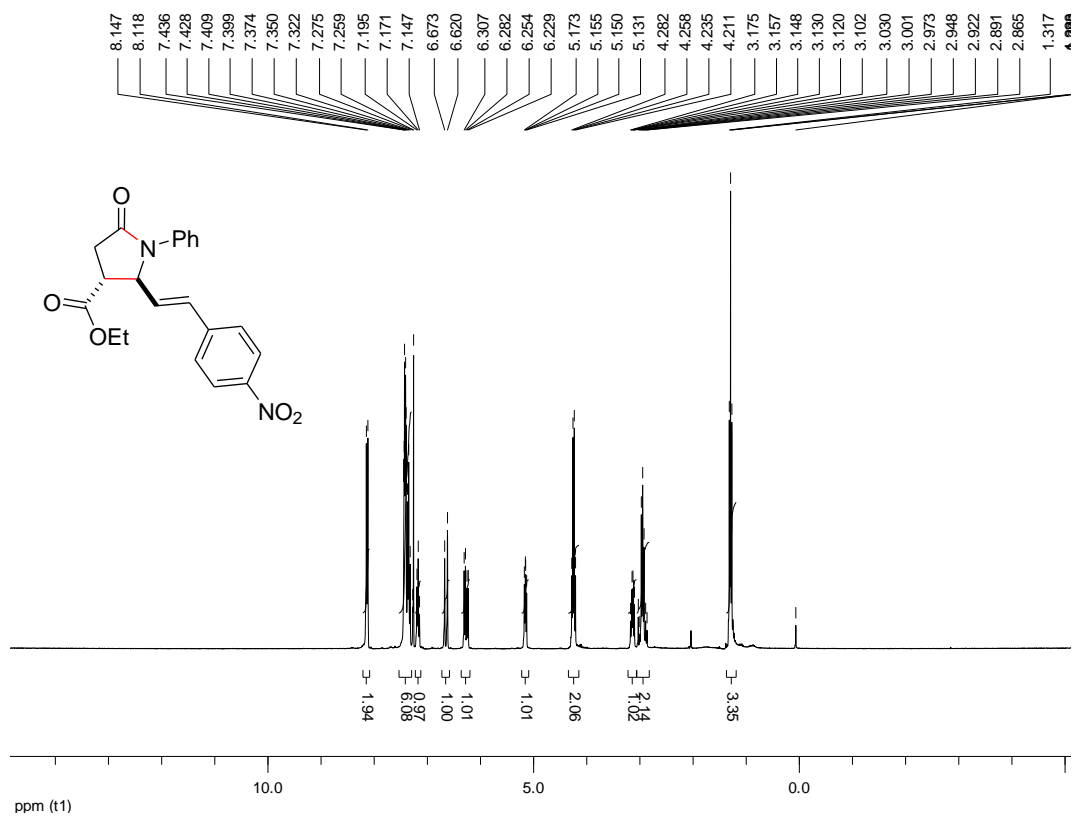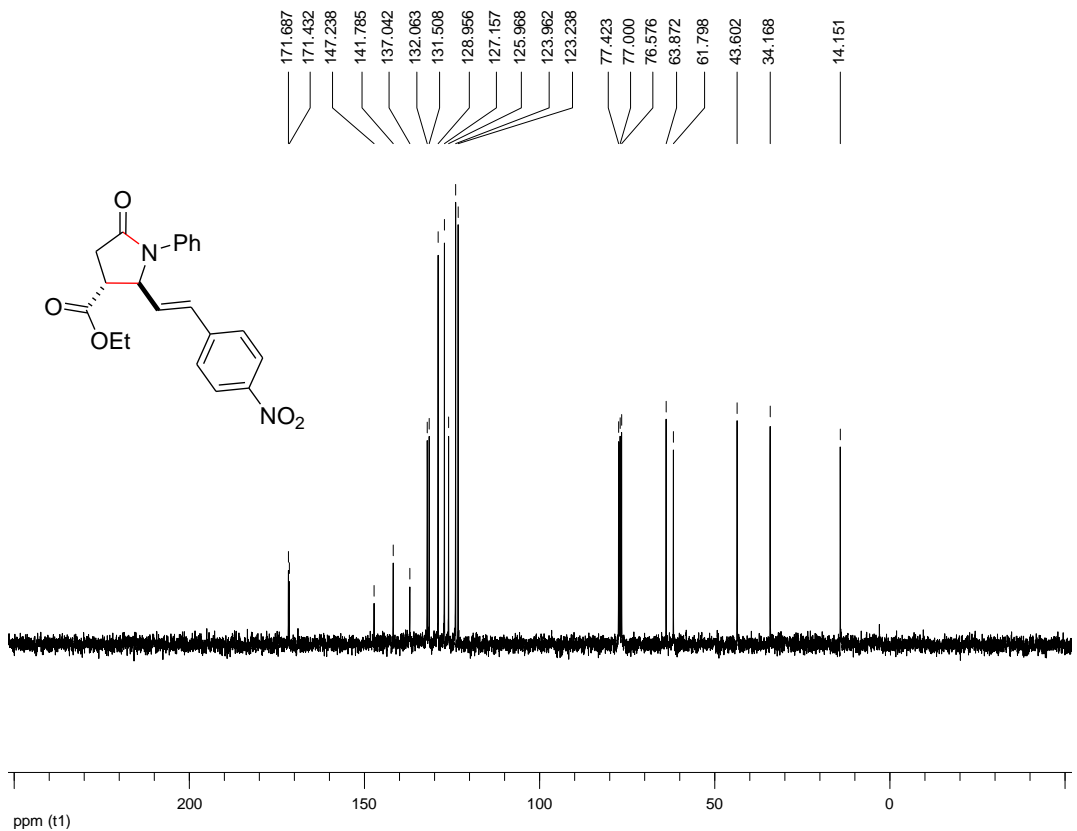

**NMR Spectra of Product 3k**

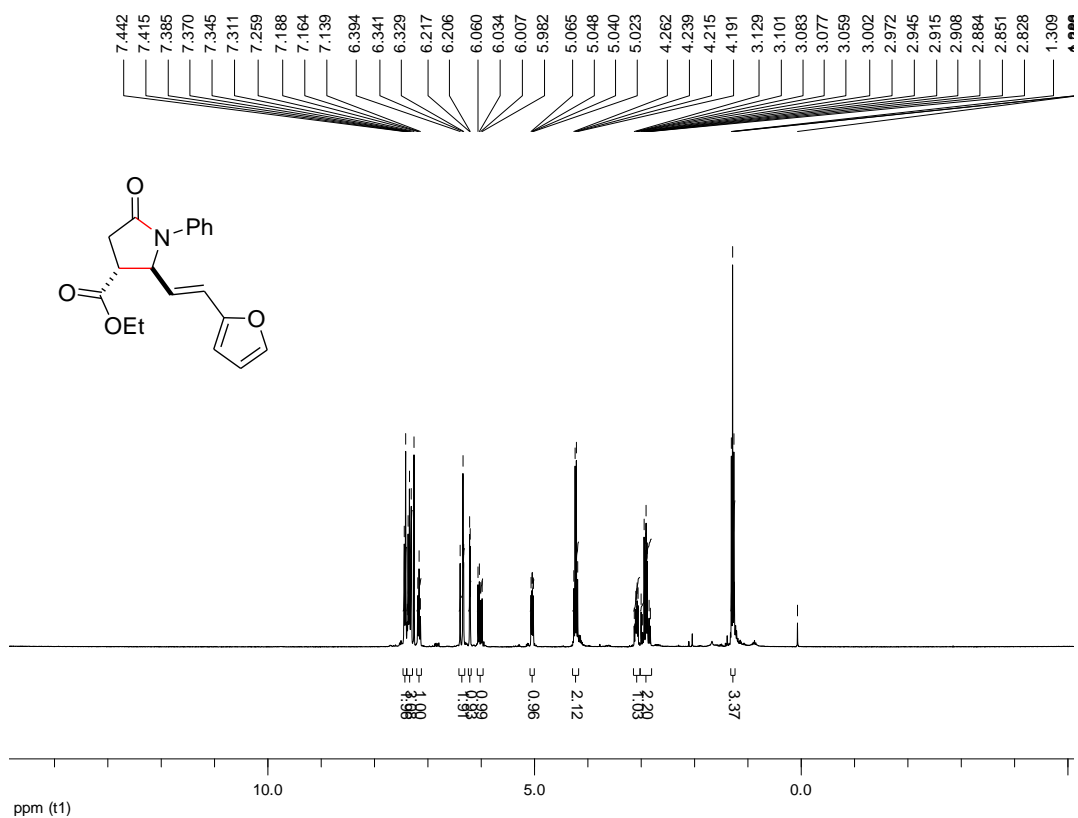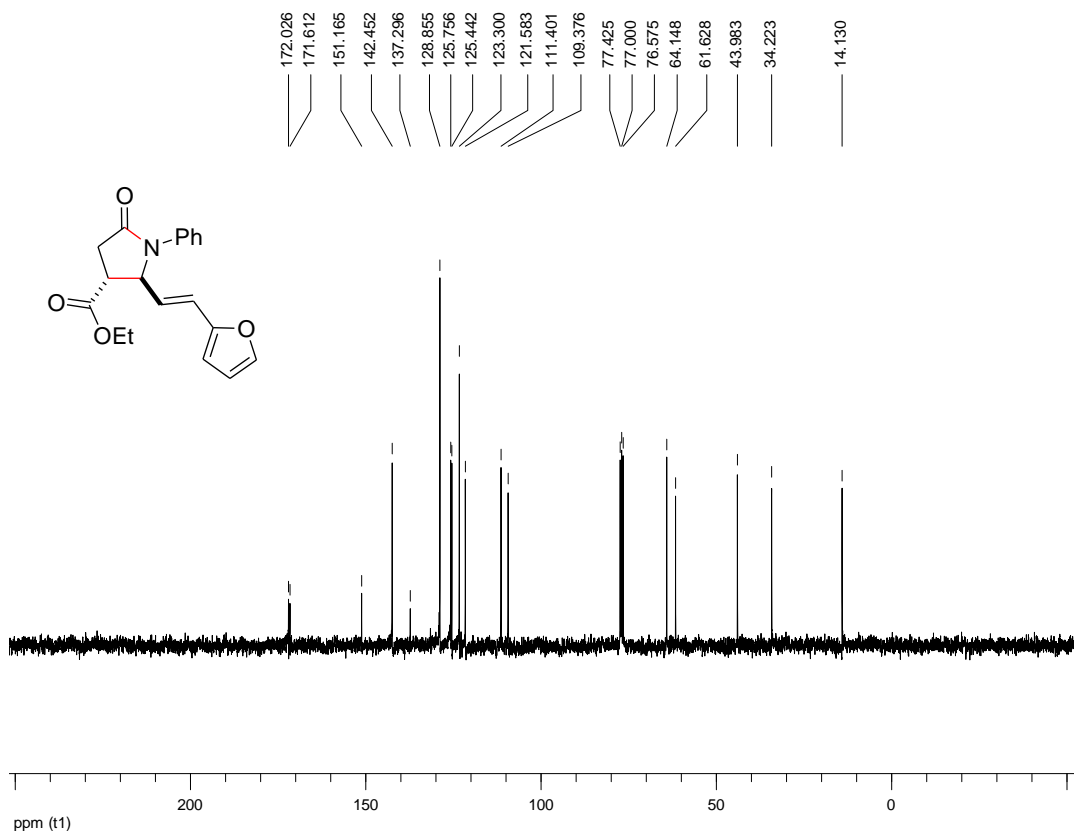

**NMR Spectra of Product 3I**

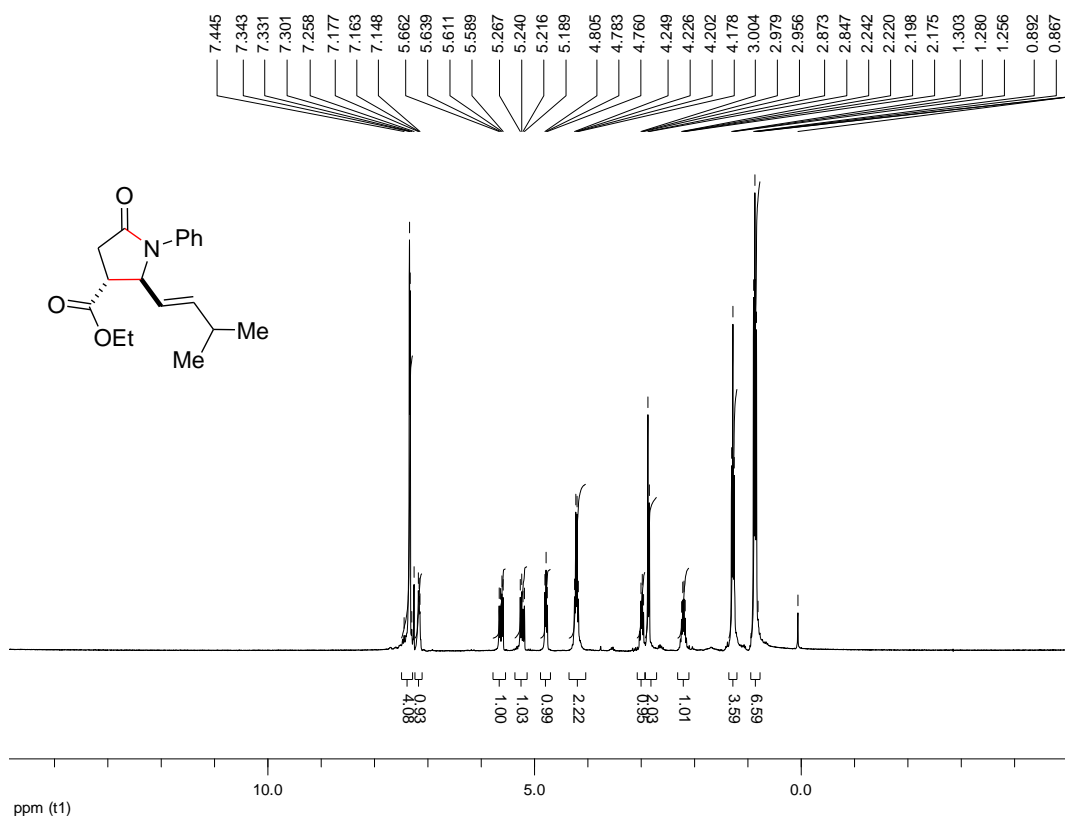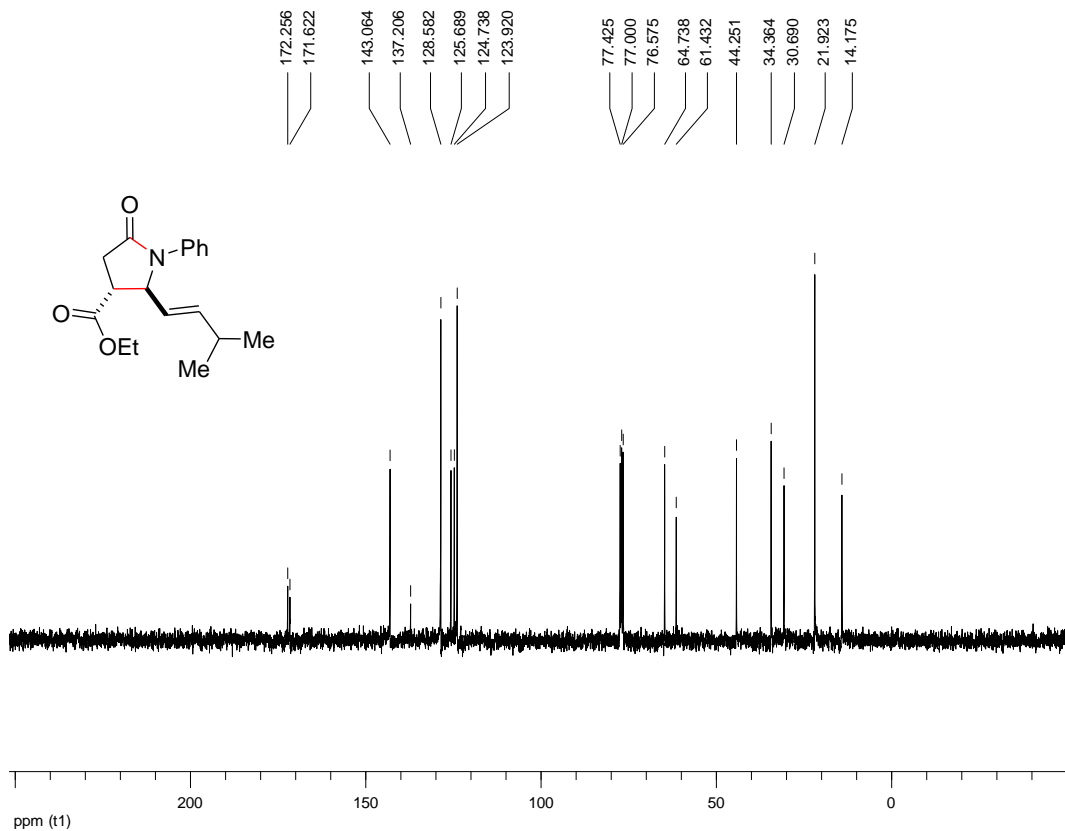

**NMR Spectra of Product 3m**

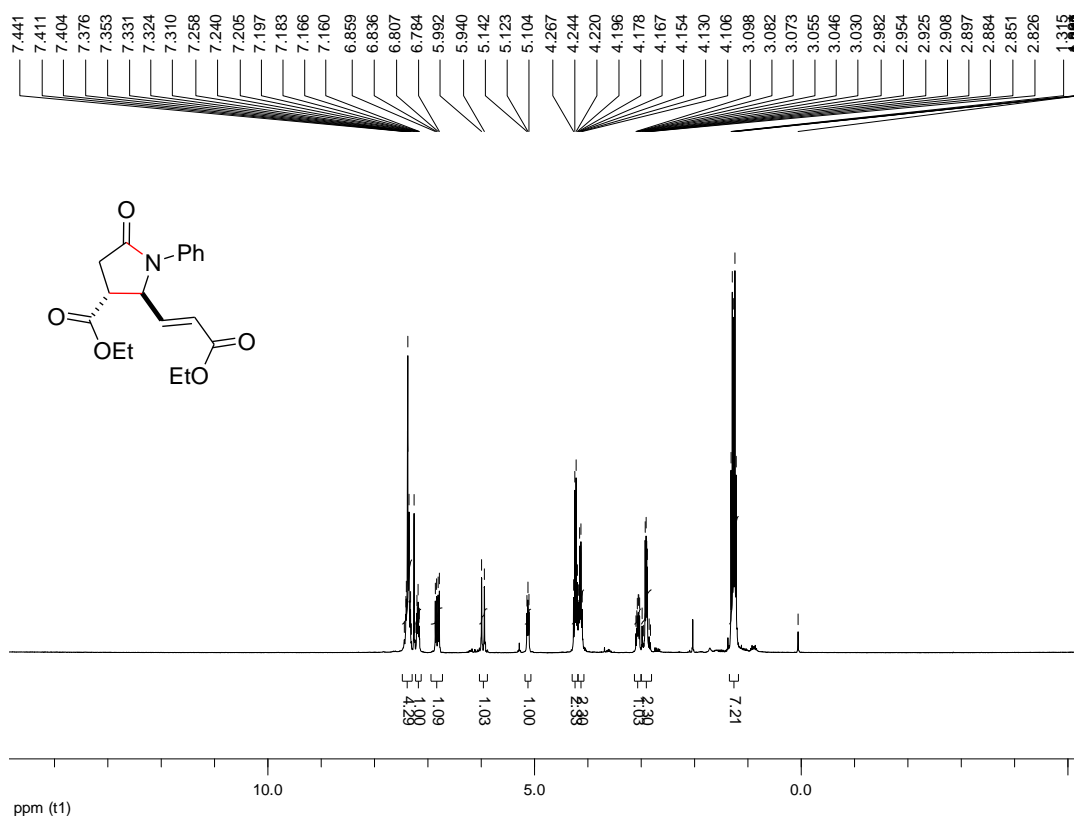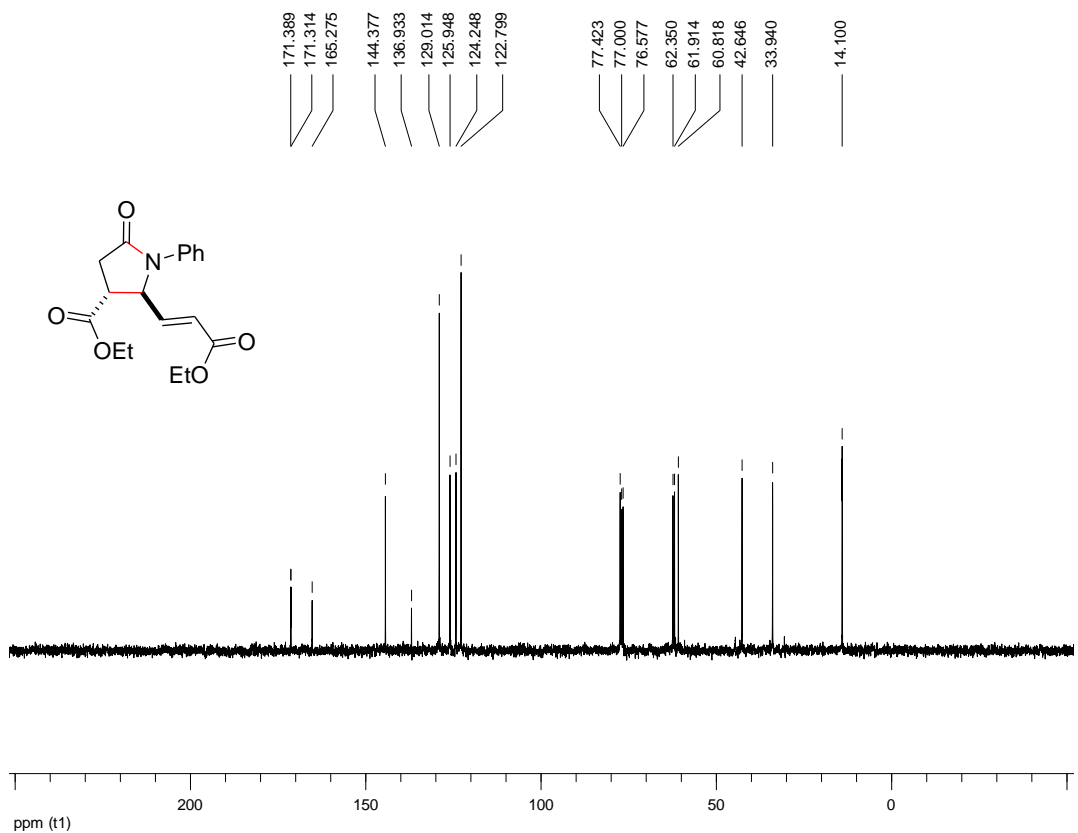

**NMR Spectra of Product 3n**

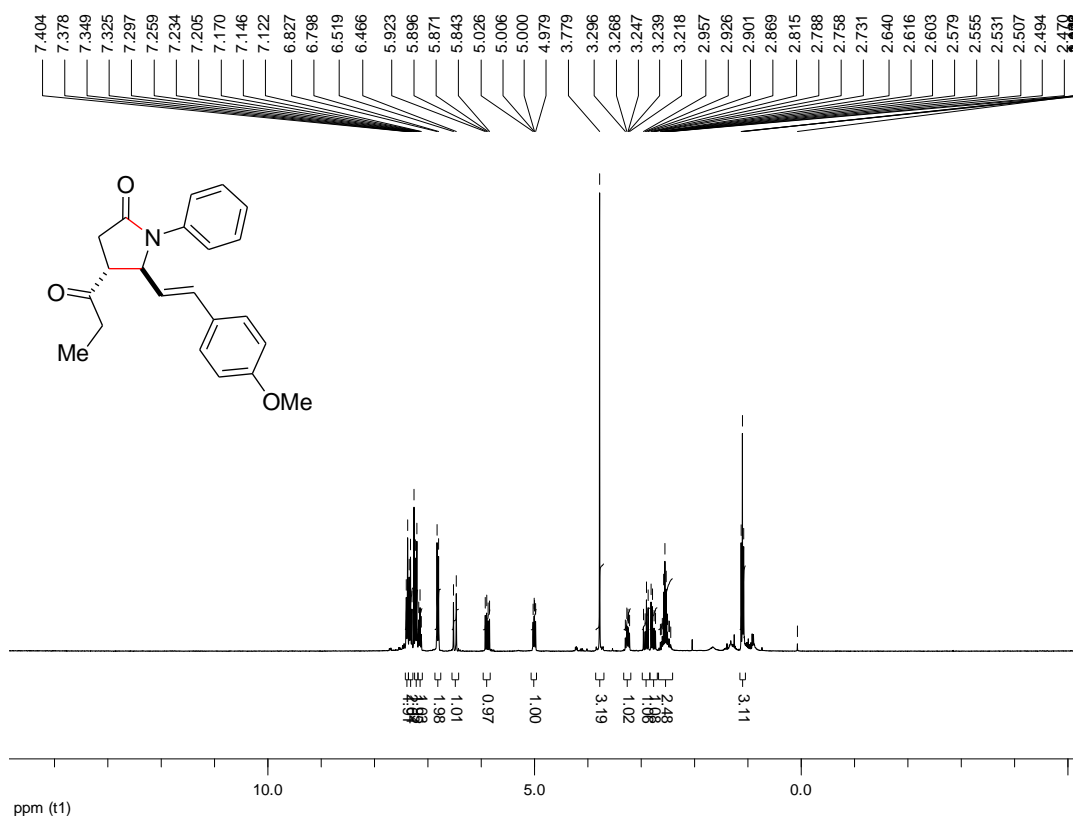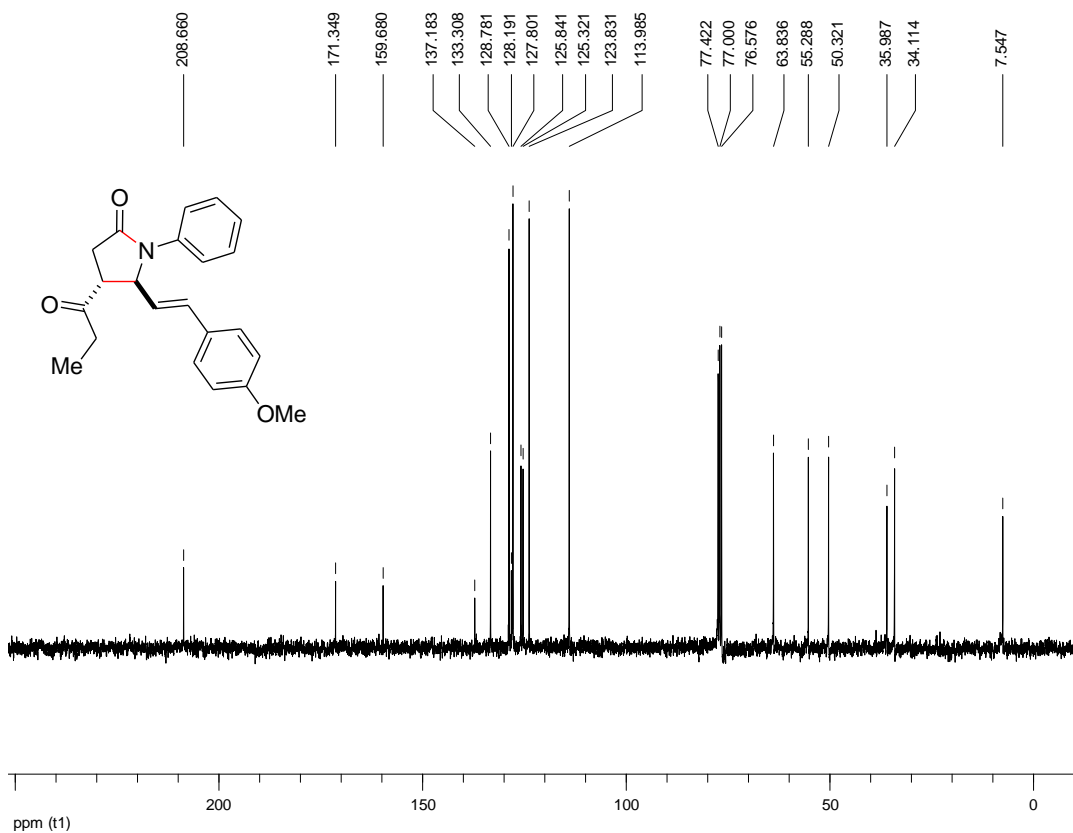

**NMR Spectra of Product 3o**

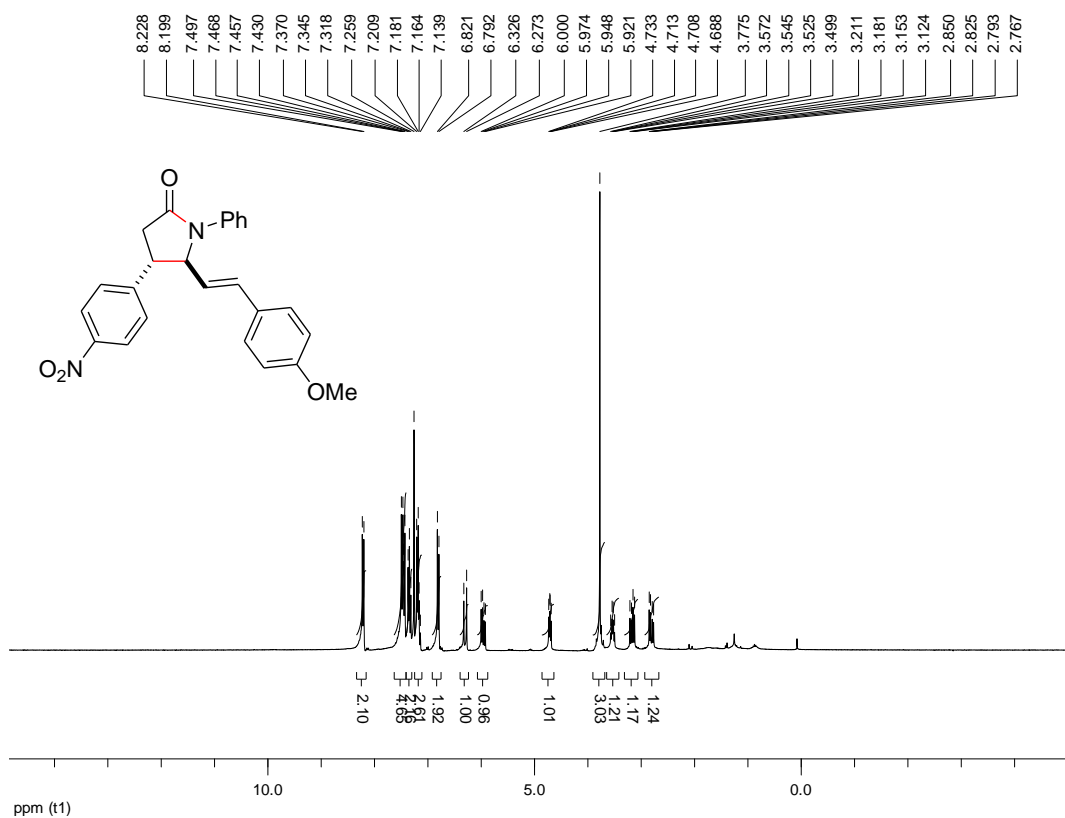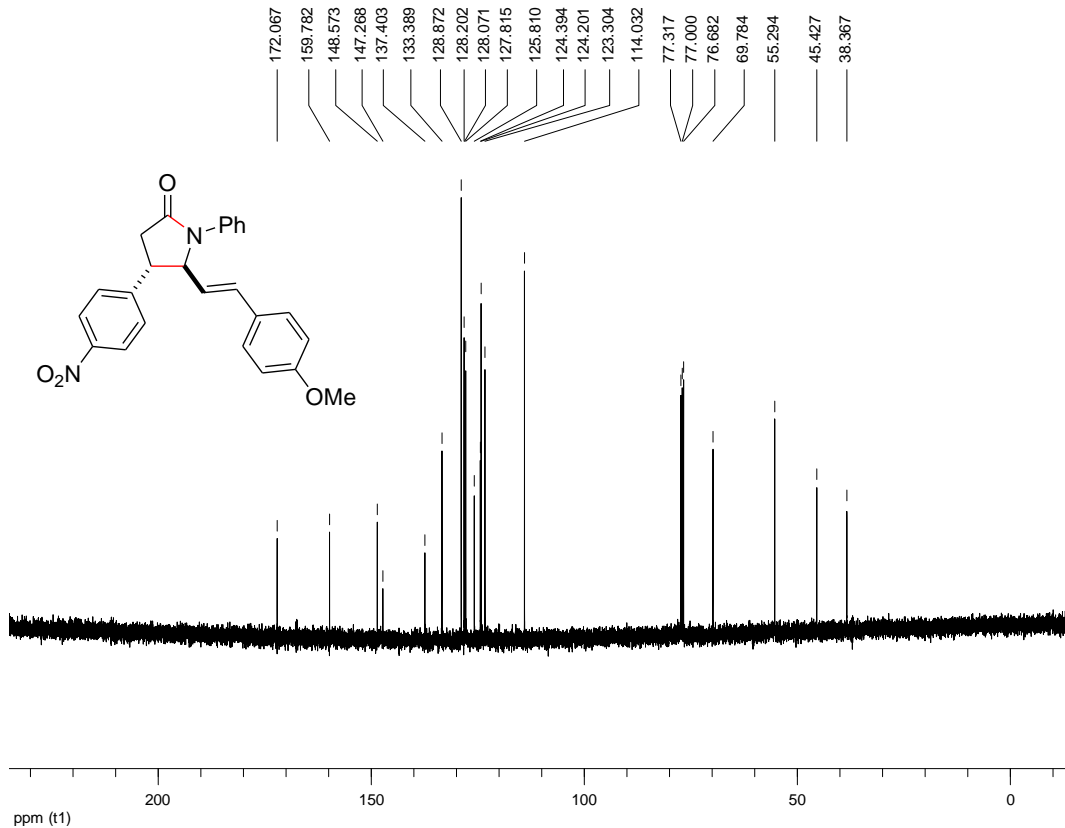



**NMR Spectra of Product 3p**

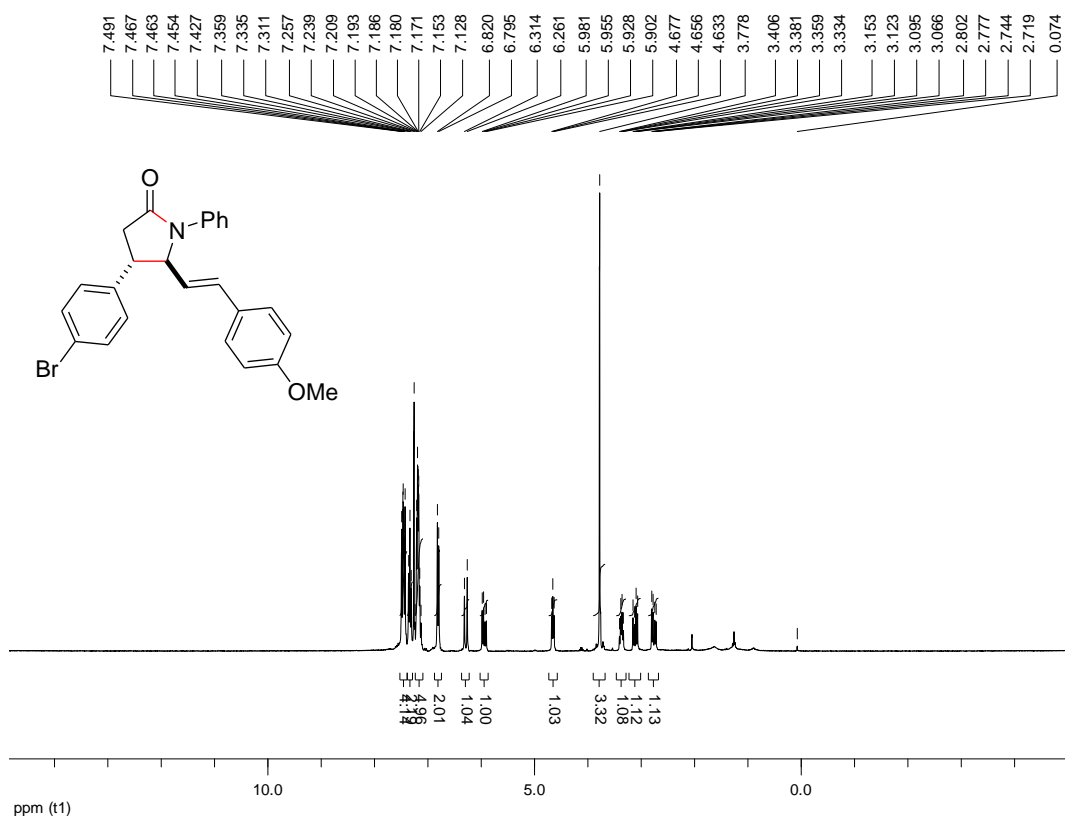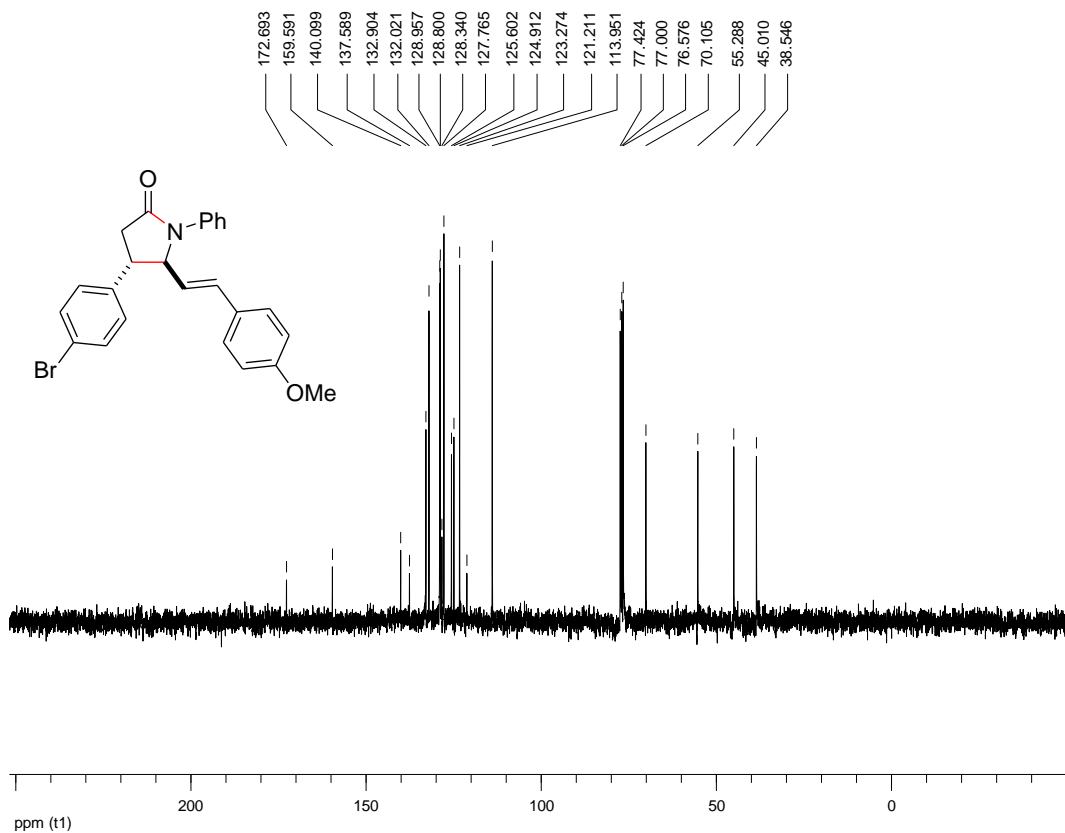



## 6. HPLC spectra for products

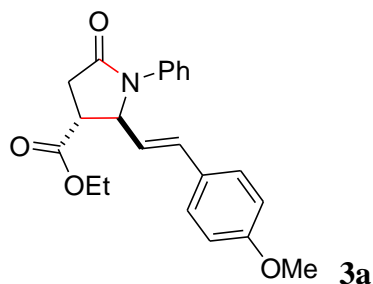

```

=====
Injection Date : 12/21/2010 12:43:18 PM      Seq. Line : 2
Sample Name    : CSUzxd-295                  Location  : Vial 9
Acq. Operator  : Rovis Group                  Inj       : 1
Acq. Instrument : Instrument 1                Inj Volume : 10 µl
Different Inj Volume from Sequence !      Actual Inj Volume : 8 µl
Acq. Method    : D:\AGILENT HPLC\METHODS\XD-IA-90-10 IML 30MIN.M
Last changed   : 7/16/2010 3:53:17 PM by Rovis Group
Analysis Method : D:\AGILENT HPLC\METHODS\IA 97-3 IML 35MIN.M
Last changed   : 6/13/2011 9:52:57 PM by Rovis Group
                (modified after loading)
=====
    
```

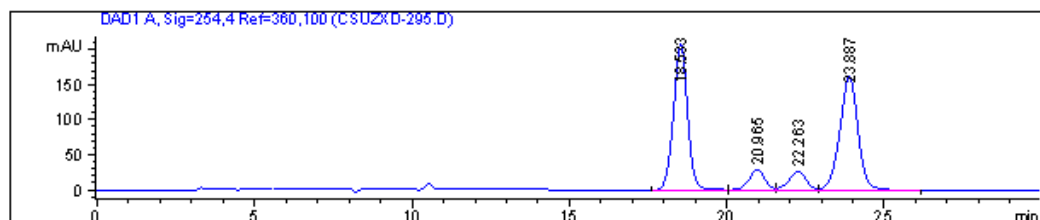

| Peak # | RetTime [min] | Type | Width [min] | Area [mAU*s] | Height [mAU] | Area %  |
|--------|---------------|------|-------------|--------------|--------------|---------|
| 1      | 18.533        | VV   | 0.4757      | 6499.29004   | 208.48705    | 42.8600 |
| 2      | 20.965        | VV   | 0.5404      | 1039.62891   | 29.41075     | 6.8559  |
| 3      | 22.263        | VV   | 0.5878      | 1050.91370   | 27.13725     | 6.9303  |
| 4      | 23.887        | VV   | 0.6067      | 6574.17090   | 162.96042    | 43.3538 |

```

=====
Injection Date : 2/23/2011 9:37:31 PM      Seq. Line : 1
Sample Name    : CSUzxd-367                  Location  : Vial 1
Acq. Operator  : Rovis Group                  Inj       : 1
Acq. Instrument : Instrument 1                Inj Volume : 10 µl
Different Inj Volume from Sequence !      Actual Inj Volume : 6 µl
Acq. Method    : D:\AGILENT HPLC\METHODS\XD-IA-90-10 IML 30MIN.M
Last changed   : 7/16/2010 3:53:17 PM by Rovis Group
Analysis Method : D:\AGILENT HPLC\METHODS\IA 97-3 IML 35MIN.M
Last changed   : 6/13/2011 9:52:57 PM by Rovis Group
                (modified after loading)
=====
    
```

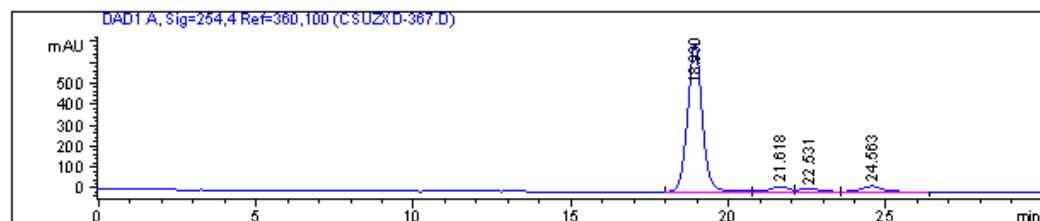

| Peak # | RetTime [min] | Type | Width [min] | Area [mAU*s] | Height [mAU] | Area %  |
|--------|---------------|------|-------------|--------------|--------------|---------|
| 1      | 18.930        | BV   | 0.4884      | 2.27257e4    | 704.31970    | 89.1647 |
| 2      | 21.618        | VV   | 0.5821      | 975.44342    | 25.06002     | 3.8272  |
| 3      | 22.531        | VV   | 0.7148      | 609.73468    | 13.00988     | 2.3923  |
| 4      | 24.563        | WB   | 0.6654      | 1176.46277   | 26.73501     | 4.6159  |

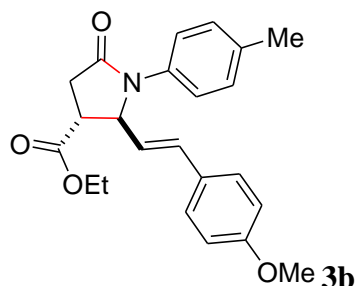

```

=====
Injection Date : 3/17/2011 10:53:04 AM      Seq. Line : 1
Sample Name    : CSUzxd-409                Location  : Vial 4
Acq. Operator  : Rovis Group                Inj      : 1
Acq. Instrument: Instrument 1              Inj Volume: 10 µl
Different Inj Volume from Sequence !      Actual Inj Volume : 4 µl
Acq. Method    : D:\AGILENT HPLC\METHODS\XD-IA-90-10 LML 40MIN.M
Last changed   : 10/9/2010 6:21:21 PM by Rovis Group
Analysis Method: D:\AGILENT HPLC\METHODS\IA 97-3 LML 35MIN.M
Last changed   : 6/13/2011 9:48:02 PM by Rovis Group
                (modified after loading)
=====
    
```

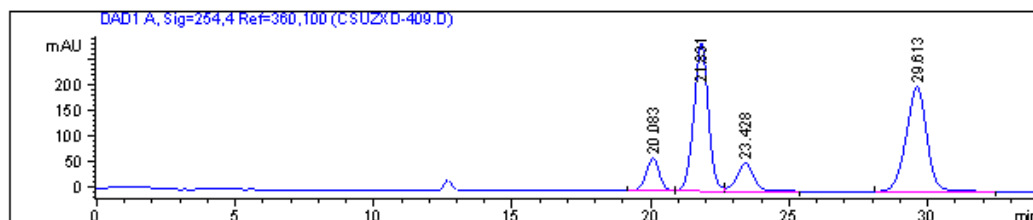

| Peak # | RetTime [min] | Type | Width [min] | Area [mAU*s] | Height [mAU] | Area %  |
|--------|---------------|------|-------------|--------------|--------------|---------|
| 1      | 20.083        | BV   | 0.5107      | 2185.18066   | 65.24619     | 8.4900  |
| 2      | 21.831        | VV   | 0.5616      | 1.06049e4    | 290.68579    | 41.2025 |
| 3      | 23.428        | VB   | 0.6418      | 2330.92432   | 54.63216     | 9.0562  |
| 4      | 29.613        | BB   | 0.7848      | 1.06174e4    | 206.17418    | 41.2513 |

```

=====
Injection Date : 3/17/2011 12:15:41 PM      Seq. Line : 2
Sample Name    : CSUzxd-400-2             Location  : Vial 7
Acq. Operator  : Rovis Group                Inj      : 1
Acq. Instrument: Instrument 1              Inj Volume: 10 µl
Different Inj Volume from Sequence !      Actual Inj Volume : 5 µl
Acq. Method    : D:\AGILENT HPLC\METHODS\XD-IA-90-10 LML 40MIN.M
Last changed   : 10/9/2010 6:21:21 PM by Rovis Group
Analysis Method: D:\AGILENT HPLC\METHODS\IA 97-3 LML 35MIN.M
Last changed   : 6/13/2011 9:48:02 PM by Rovis Group
                (modified after loading)
=====
    
```

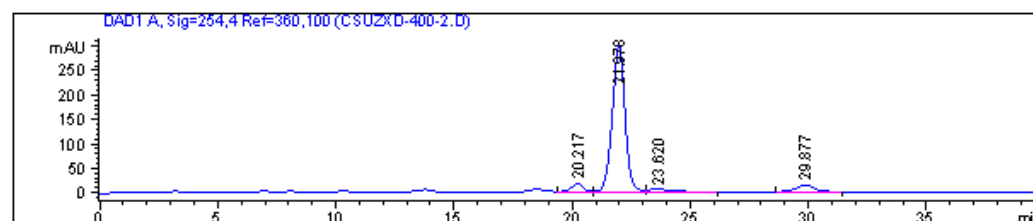

| Peak # | RetTime [min] | Type | Width [min] | Area [mAU*s] | Height [mAU] | Area %  |
|--------|---------------|------|-------------|--------------|--------------|---------|
| 1      | 20.217        | VV   | 0.5639      | 636.83850    | 17.04400     | 4.9313  |
| 2      | 21.978        | VV   | 0.5651      | 1.12218e4    | 299.49097    | 86.8949 |
| 3      | 23.620        | VB   | 0.8370      | 346.07196    | 5.75987      | 2.6798  |
| 4      | 29.877        | BB   | 0.7933      | 709.51196    | 13.58589     | 5.4940  |

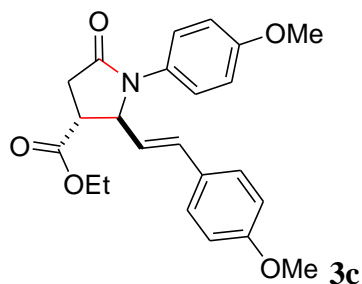

```

=====
Injection Date   : 3/18/2011 10:44:13 AM      Seq. Line   : 1
Sample Name     : CSUzxd-410-7              Location    : Vial 5
Acq. Operator   : Rovis Group                Inj         : 1
Acq. Instrument : Instrument 1               Inj Volume  : 10 µl
Different Inj Volume from Sequence ! Actual Inj Volume : 4 µl
Acq. Method     : D:\AGILENT HPLC\METHODS\XD-IA-75-25 1ML 25MIN.M
Last changed    : 9/27/2010 9:36:11 AM by Rovis Group
Analysis Method : D:\AGILENT HPLC\METHODS\IA 97-3 1ML 35MIN.M
Last changed    : 6/13/2011 9:36:45 PM by Rovis Group
                  (modified after loading)
=====
    
```

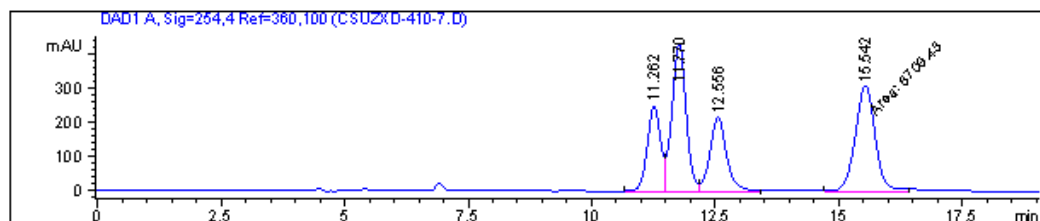

| Peak # | RetTime [min] | Type | Width [min] | Area [mAU*s] | Height [mAU] | Area %  |
|--------|---------------|------|-------------|--------------|--------------|---------|
| 1      | 11.262        | BV   | 0.2802      | 4615.64453   | 249.02686    | 17.0568 |
| 2      | 11.770        | VV   | 0.3053      | 8632.49414   | 431.74124    | 31.9009 |
| 3      | 12.556        | VV   | 0.3552      | 5102.79834   | 216.33461    | 18.8571 |
| 4      | 15.542        | MM   | 0.4661      | 8709.43359   | 311.45889    | 32.1852 |

```

=====
Injection Date   : 4/4/2011 1:10:15 PM      Seq. Line   : 1
Sample Name     : CSUzxd-404-2              Location    : Vial 2
Acq. Operator   : Rovis Group                Inj         : 1
Acq. Instrument : Instrument 1               Inj Volume  : 10 µl
Different Inj Volume from Sequence ! Actual Inj Volume : 8 µl
Acq. Method     : D:\AGILENT HPLC\METHODS\XD-IA-75-25 1ML 25MIN.M
Last changed    : 9/27/2010 9:36:11 AM by Rovis Group
Analysis Method : D:\AGILENT HPLC\METHODS\IA 97-3 1ML 35MIN.M
Last changed    : 6/13/2011 9:46:28 PM by Rovis Group
                  (modified after loading)
=====
    
```

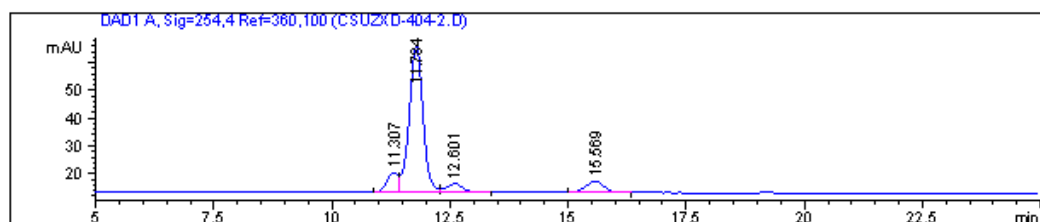

| Peak # | RetTime [min] | Type | Width [min] | Area [mAU*s] | Height [mAU] | Area %  |
|--------|---------------|------|-------------|--------------|--------------|---------|
| 1      | 11.307        | BV   | 0.2554      | 116.09611    | 7.07822      | 8.3553  |
| 2      | 11.784        | VV   | 0.3105      | 1082.53906   | 52.96441     | 77.9088 |
| 3      | 12.601        | VB   | 0.3688      | 77.69789     | 3.13838      | 5.5918  |
| 4      | 15.569        | BB   | 0.4275      | 113.16182    | 4.08086      | 8.1441  |

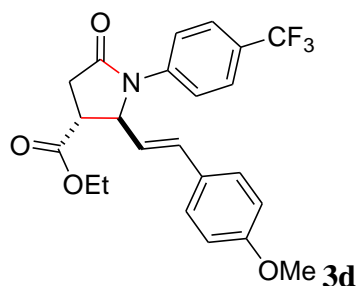

```

=====
Injection Date : 3/28/2011 12:28:39 PM      Seq. Line : 2
Sample Name    : CSUzxd-426-1              Location  : Vial 2
Acq. Operator  : Rovis Group                Inj      : 1
Acq. Instrument: Instrument 1              Inj Volume: 10 µl
Different Inj Volume from Sequence !      Actual Inj Volume : 3 µl
Acq. Method    : D:\AGILENT HPLC\METHODS\XD-IA-95-5 LML 60 MIN.M
Last changed   : 3/17/2011 4:16:47 PM by Rovis Group
Analysis Method: D:\AGILENT HPLC\METHODS\IA 97-3 LML 35MIN.M
Last changed   : 6/13/2011 9:13:53 PM by Rovis Group
                (modified after loading)
=====
    
```

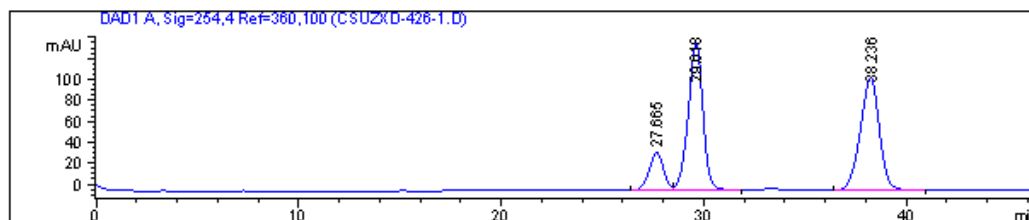

| Peak # | RetTime [min] | Type | Width [min] | Area [mAU*s] | Height [mAU] | Area %  |
|--------|---------------|------|-------------|--------------|--------------|---------|
| 1      | 27.665        | BV   | 0.7509      | 1790.74451   | 36.33751     | 11.1594 |
| 2      | 29.618        | VB   | 0.7692      | 7147.93799   | 140.57462    | 44.5439 |
| 3      | 38.236        | BB   | 1.0109      | 7108.27051   | 107.57991    | 44.2967 |

```

=====
Injection Date : 3/28/2011 1:19:39 PM      Seq. Line : 1
Sample Name    : CSUzxd-418-2              Location  : Vial 7
Acq. Operator  : Rovis Group                Inj      : 1
Acq. Instrument: Instrument 1              Inj Volume: 10 µl
Different Inj Volume from Sequence !      Actual Inj Volume : 3 µl
Acq. Method    : D:\AGILENT HPLC\METHODS\XD-IA-95-5 LML 60 MIN.M
Last changed   : 3/17/2011 4:16:47 PM by Rovis Group
Analysis Method: D:\AGILENT HPLC\METHODS\IA 97-3 LML 35MIN.M
Last changed   : 6/13/2011 9:13:53 PM by Rovis Group
                (modified after loading)
=====
    
```

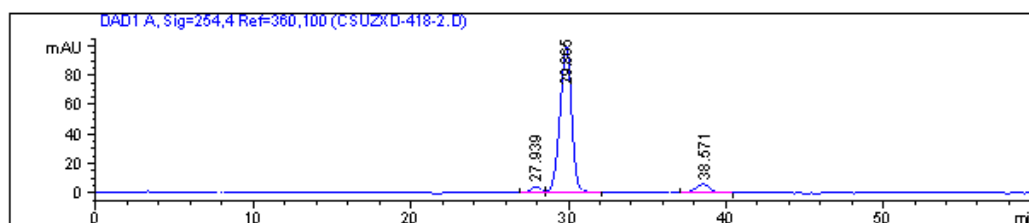

| Peak # | RetTime [min] | Type | Width [min] | Area [mAU*s] | Height [mAU] | Area %  |
|--------|---------------|------|-------------|--------------|--------------|---------|
| 1      | 27.939        | BV   | 0.7293      | 205.18219    | 4.38992      | 3.5292  |
| 2      | 29.865        | VB   | 0.7915      | 5210.50098   | 100.05789    | 89.6223 |
| 3      | 38.571        | BB   | 1.0398      | 398.16263    | 5.92628      | 6.8485  |

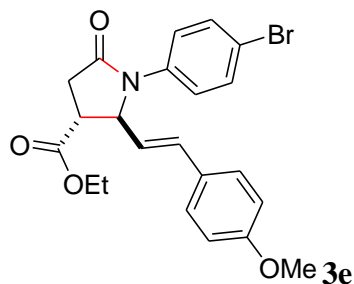

```

=====
Injection Date : 5/24/2011 10:52:13 AM      Seq. Line : 2
Sample Name    : CSUzxd-506                 Location  : Vial 3
Acq. Operator  : Rovis Group                Inj       : 1
Acq. Instrument : Instrument 1              Inj Volume : 10 µl
Different Inj Volume from Sequence !      Actual Inj Volume : 4 µl
Acq. Method    : D:\AGILENT HPLC\METHODS\XD-IA-90-10 IML 40MIN.M
Last changed   : 5/24/2011 11:24:09 AM by Rovis Group
                (modified after loading)
Analysis Method : D:\AGILENT HPLC\METHODS\IA 99-1 IML 35MIN.M
Last changed   : 6/10/2011 10:21:47 PM by Rovis Group
                (modified after loading)
=====
    
```

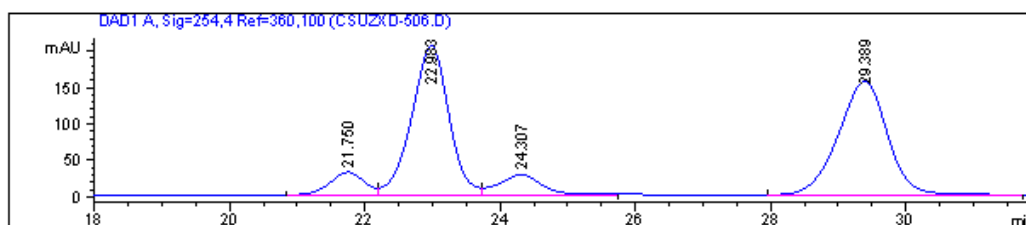

| Peak # | RetTime [min] | Type | Width [min] | Area [mAU*s] | Height [mAU] | Area %  |
|--------|---------------|------|-------------|--------------|--------------|---------|
| 1      | 21.750        | VV   | 0.5419      | 1103.40234   | 31.10537     | 6.1408  |
| 2      | 22.983        | VV   | 0.5816      | 7821.12695   | 204.78281    | 43.5269 |
| 3      | 24.307        | VB   | 0.6601      | 1215.39746   | 27.47562     | 6.7640  |
| 4      | 29.389        | BB   | 0.7609      | 7828.57910   | 156.16014    | 43.5683 |

```

=====
Injection Date : 5/25/2011 12:19:31 PM      Seq. Line : 1
Sample Name    : CSUzxd-508                 Location  : Vial 4
Acq. Operator  : Rovis Group                Inj       : 1
Acq. Instrument : Instrument 1              Inj Volume : 10 µl
Different Inj Volume from Sequence !      Actual Inj Volume : 4 µl
Acq. Method    : D:\AGILENT HPLC\METHODS\XD-IA-90-10 IML 40MIN.M
Last changed   : 10/9/2010 6:21:21 PM by Rovis Group
Analysis Method : D:\AGILENT HPLC\METHODS\IA 99-1 IML 35MIN.M
Last changed   : 6/10/2011 10:40:24 PM by Rovis Group
                (modified after loading)
=====
    
```

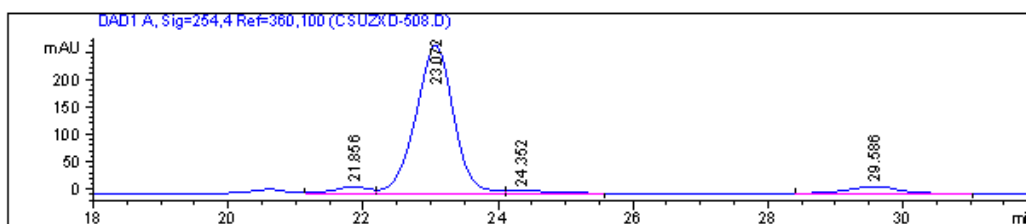

| Peak # | RetTime [min] | Type | Width [min] | Area [mAU*s] | Height [mAU] | Area %  |
|--------|---------------|------|-------------|--------------|--------------|---------|
| 1      | 21.856        | VV   | 0.5332      | 416.62830    | 11.99605     | 3.5660  |
| 2      | 23.072        | VV   | 0.5892      | 1.04511e4    | 269.06799    | 89.4525 |
| 3      | 24.352        | VB   | 0.6001      | 187.97130    | 4.72520      | 1.6089  |
| 4      | 29.586        | BB   | 0.7801      | 627.70709    | 12.45283     | 5.3726  |

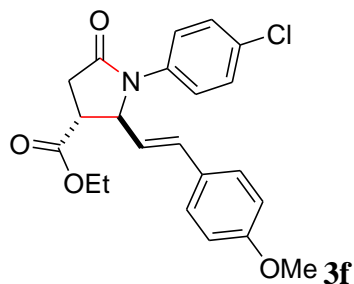

```

=====
Injection Date : 4/8/2011 9:57:07 AM      Seq. Line : 1
Sample Name    : CSUzxd-432-3             Location  : Vial 1
Acq. Operator  : Rovis Group              Inj       : 1
Acq. Instrument: Instrument 1             Inj Volume: 10 µl
Different Inj Volume from Sequence !      Actual Inj Volume : 3 µl
Acq. Method    : D:\AGILENT HPLC\METHODS\XD-IA-97-3 1ML 60 MIN.M
Last changed   : 4/8/2011 11:22:20 AM by Rovis Group
               (modified after loading)
Analysis Method: D:\AGILENT HPLC\METHODS\XD ODH 80-20 1ML 30MIN.M
Last changed   : 6/13/2011 8:59:31 PM by Rovis Group
               (modified after loading)
=====
    
```

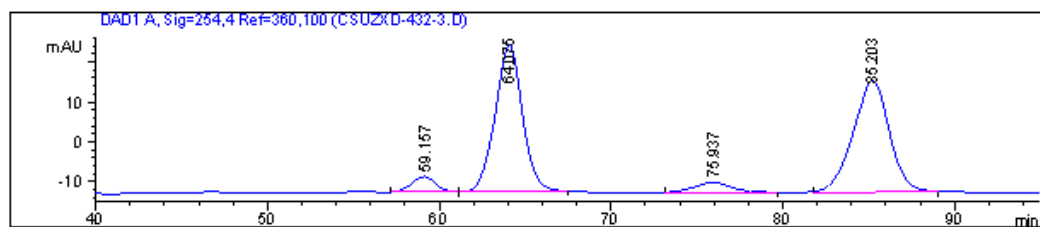

| Peak # | RetTime [min] | Type | Width [min] | Area [mAU*s] | Height [mAU] | Area %  |
|--------|---------------|------|-------------|--------------|--------------|---------|
| 1      | 59.157        | BV   | 1.3016      | 366.65134    | 3.82759      | 4.1007  |
| 2      | 64.075        | VB   | 1.6785      | 4091.94238   | 36.87767     | 45.7654 |
| 3      | 75.937        | BB   | 1.8549      | 377.93146    | 2.46203      | 4.2269  |
| 4      | 85.203        | BB   | 2.1438      | 4104.60742   | 27.97445     | 45.9070 |

```

=====
Injection Date : 4/8/2011 12:59:24 PM     Seq. Line : 2
Sample Name    : CSUzxd-433             Location  : Vial 2
Acq. Operator  : Rovis Group              Inj       : 1
Acq. Instrument: Instrument 1             Inj Volume: 10 µl
Different Inj Volume from Sequence !      Actual Inj Volume : 8 µl
Acq. Method    : D:\AGILENT HPLC\METHODS\XD-IA-97-3 1ML 60 MIN.M
Last changed   : 4/8/2011 1:17:28 PM by Rovis Group
               (modified after loading)
Analysis Method: D:\AGILENT HPLC\METHODS\XD ODH 80-20 1ML 30MIN.M
Last changed   : 6/13/2011 8:59:31 PM by Rovis Group
               (modified after loading)
=====
    
```

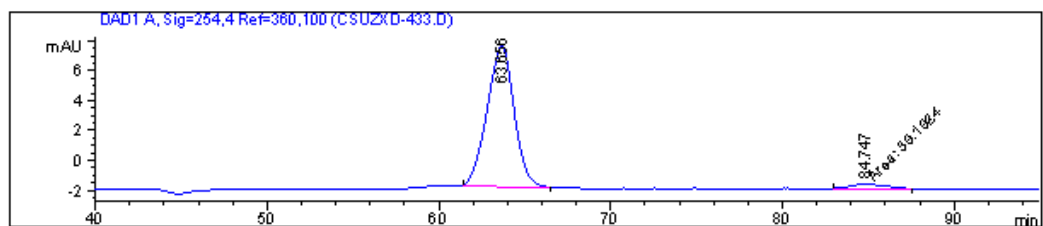

| Peak # | RetTime [min] | Type | Width [min] | Area [mAU*s] | Height [mAU] | Area %  |
|--------|---------------|------|-------------|--------------|--------------|---------|
| 1      | 63.656        | BE   | 1.5215      | 1030.68420   | 9.50179      | 96.3367 |
| 2      | 84.747        | MM   | 2.0696      | 39.19243     | 3.15618e-1   | 3.6633  |



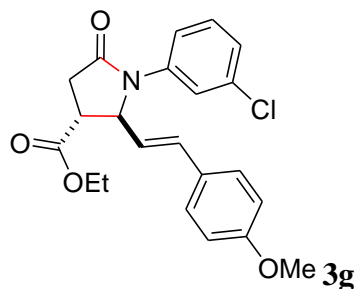

```

=====
Injection Date : 4/7/2011 11:03:01 PM      Seq. Line : 1
Sample Name   : CSUzxd-440-4              Location  : Vial 2
Acq. Operator : Rovis Group                Inj      : 1
Acq. Instrument : Instrument 1             Inj Volume : 10 µl
Different Inj Volume from Sequence !      Actual Inj Volume : 6 µl
Acq. Method   : D:\AGILENT HPLC\METHODS\XD-IA-98-2 1ML 60 MIN.M
Last changed  : 4/8/2011 12:25:23 AM by Rovis Group
              (modified after loading)
Analysis Method : D:\AGILENT HPLC\METHODS\XD ODH 80-20 1ML 30MIN.M
Last changed  : 6/13/2011 8:37:11 PM by Rovis Group
              (modified after loading)
=====
    
```

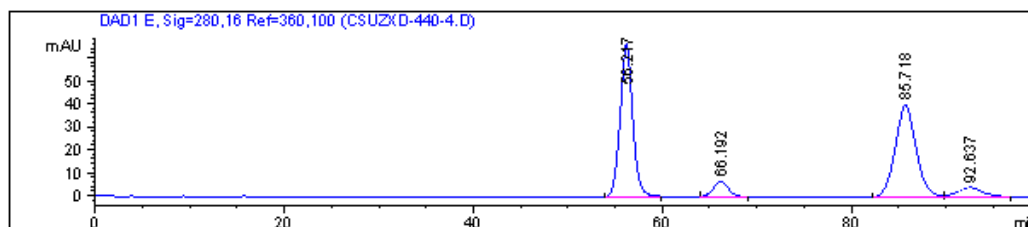

| Peak # | RetTime [min] | Type | Width [min] | Area [mAU*s] | Height [mAU] | Area %  |
|--------|---------------|------|-------------|--------------|--------------|---------|
| 1      | 56.217        | BB   | 1.3625      | 6121.42188   | 66.21866     | 44.6241 |
| 2      | 66.192        | BB   | 1.5934      | 741.90442    | 6.63051      | 5.4084  |
| 3      | 85.718        | BB   | 2.1154      | 6109.00781   | 40.14426     | 44.5336 |
| 4      | 92.637        | BB   | 2.3002      | 745.40149    | 4.10951      | 5.4339  |

```

=====
Injection Date : 4/9/2011 11:49:11 PM      Seq. Line : 1
Sample Name   : CSUzxd-442              Location  : Vial 3
Acq. Operator : Rovis Group                Inj      : 1
Acq. Instrument : Instrument 1             Inj Volume : 10 µl
Different Inj Volume from Sequence !      Actual Inj Volume : 1 µl
Acq. Method   : D:\AGILENT HPLC\METHODS\XD-IA-98-2 1ML 60 MIN.M
Last changed  : 4/9/2011 11:45:04 PM by Rovis Group
              (modified after loading)
Analysis Method : D:\AGILENT HPLC\METHODS\XD ODH 80-20 1ML 30MIN.M
Last changed  : 6/13/2011 8:54:27 PM by Rovis Group
              (modified after loading)
=====
    
```

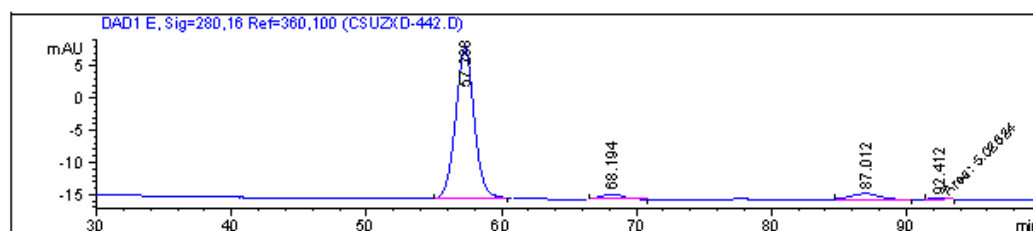

| Peak # | RetTime [min] | Type | Width [min] | Area [mAU*s] | Height [mAU] | Area %  |
|--------|---------------|------|-------------|--------------|--------------|---------|
| 1      | 57.288        | BB   | 1.4906      | 2268.14917   | 23.57191     | 91.4641 |
| 2      | 68.194        | BB   | 1.3352      | 85.21616     | 8.02295e-1   | 3.4364  |
| 3      | 87.012        | BB   | 1.6756      | 121.43230    | 8.85671e-1   | 4.8968  |
| 4      | 92.412        | MM   | 1.6237      | 5.02624      | 5.15921e-2   | 0.2027  |

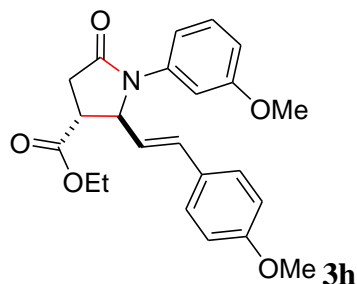

```

=====
Injection Date : 4/7/2011 3:53:52 PM          Seq. Line : 1
Sample Name   : CSUzxd-439-1                 Location  : Vial 1
Acq. Operator : Rovis Group                   Inj       : 1
Acq. Instrument : Instrument 1                 Inj Volume : 10 µl
Different Inj Volume from Sequence !         Actual Inj Volume : 6 µl
Acq. Method   : D:\AGILENT HPLC\METHODS\XD-IA-90-10 IML 40MIN.M
Last changed  : 10/9/2010 6:21:21 PM by Rovis Group
Analysis Method : D:\AGILENT HPLC\METHODS\IA 97-3 IML 35MIN.M
Last changed  : 6/13/2011 9:36:45 PM by Rovis Group
              (modified after loading)
=====
    
```

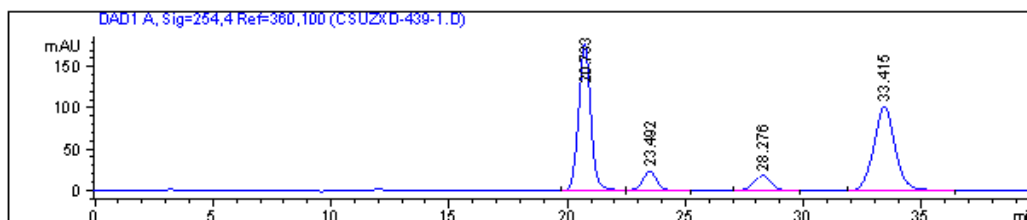

| Peak # | RetTime [min] | Type | Width [min] | Area [mAU*s] | Height [mAU] | Area %  |
|--------|---------------|------|-------------|--------------|--------------|---------|
| 1      | 20.733        | BV   | 0.5480      | 6432.87305   | 178.67545    | 43.4656 |
| 2      | 23.492        | VB   | 0.6543      | 1005.56335   | 23.35649     | 6.7944  |
| 3      | 28.276        | BB   | 0.7802      | 941.40942    | 18.17768     | 6.3609  |
| 4      | 33.415        | BB   | 0.9389      | 6420.08398   | 102.48081    | 43.3792 |

```

=====
Injection Date : 4/9/2011 4:08:37 PM          Seq. Line : 2
Sample Name   : CSUzxd-441-1                 Location  : Vial 3
Acq. Operator : Rovis Group                   Inj       : 1
Acq. Instrument : Instrument 1                 Inj Volume : 10 µl
Different Inj Volume from Sequence !         Actual Inj Volume : 6 µl
Acq. Method   : D:\AGILENT HPLC\METHODS\XD-IA-90-10 IML 40MIN.M
Last changed  : 10/9/2010 6:21:21 PM by Rovis Group
Analysis Method : D:\AGILENT HPLC\METHODS\IA 97-3 IML 35MIN.M
Last changed  : 6/13/2011 9:36:45 PM by Rovis Group
              (modified after loading)
=====
    
```

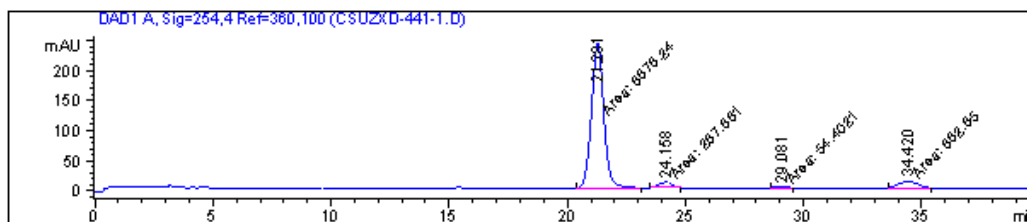

| Peak # | RetTime [min] | Type | Width [min] | Area [mAU*s] | Height [mAU] | Area %  |
|--------|---------------|------|-------------|--------------|--------------|---------|
| 1      | 21.281        | MM   | 0.6102      | 8878.24219   | 242.50221    | 89.6487 |
| 2      | 24.158        | MM   | 0.5769      | 287.88129    | 8.31754      | 2.9069  |
| 3      | 29.081        | MM   | 0.6111      | 54.40211     | 1.48366      | 0.5493  |
| 4      | 34.420        | MM   | 0.9587      | 682.84955    | 11.87061     | 6.8951  |

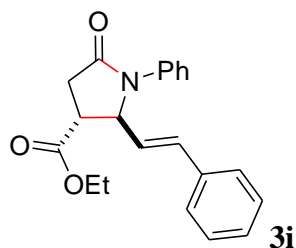

```

=====
Injection Date : 3/1/2011 9:12:24 PM          Seq. Line : 1
Sample Name   : CSUzxd-375                   Location  : Vial 2
Acq. Operator : Rovis Group                  Inj       : 1
Acq. Instrument : Instrument 1                Inj Volume : 10 µl
Different Inj Volume from Sequence !        Actual Inj Volume : 5 µl
Acq. Method   : D:\AGILENT HPLC\METHODS\XD-IA-90-10 1ML 30MIN.M
Last changed  : 7/16/2010 3:53:17 PM by Rovis Group
Analysis Method : D:\AGILENT HPLC\METHODS\IA 97-3 1ML 35MIN.M
Last changed  : 6/13/2011 9:52:57 PM by Rovis Group
              (modified after loading)
=====
    
```

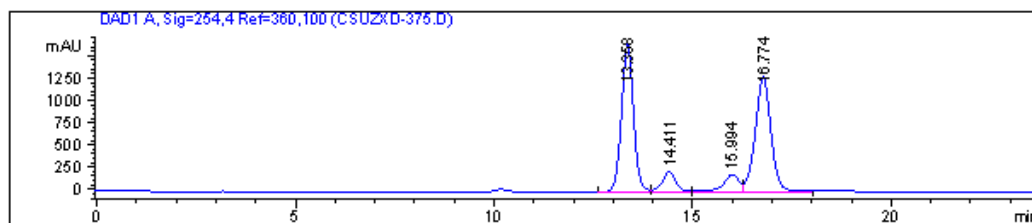

| Peak # | RetTime [min] | Type | Width [min] | Area [mAU*s] | Height [mAU] | Area %  |
|--------|---------------|------|-------------|--------------|--------------|---------|
| 1      | 13.358        | VV   | 0.3250      | 3.48158e4    | 1657.86182   | 43.0116 |
| 2      | 14.411        | VV   | 0.3543      | 5268.65918   | 224.06734    | 6.5089  |
| 3      | 15.994        | VV   | 0.4109      | 5374.14746   | 194.16936    | 6.6393  |
| 4      | 16.774        | VV   | 0.4177      | 3.54864e4    | 1286.87939   | 43.8402 |

```

=====
Injection Date : 3/11/2011 11:26:12 AM       Seq. Line : 1
Sample Name   : CSUzxd-396                   Location  : Vial 1
Acq. Operator : Rovis Group                  Inj       : 1
Acq. Instrument : Instrument 1                Inj Volume : 10 µl
Different Inj Volume from Sequence !        Actual Inj Volume : 6 µl
Acq. Method   : D:\AGILENT HPLC\METHODS\XD-IA-90-10 1ML 30MIN.M
Last changed  : 7/16/2010 3:53:17 PM by Rovis Group
Analysis Method : D:\AGILENT HPLC\METHODS\IA 97-3 1ML 35MIN.M
Last changed  : 6/13/2011 9:52:57 PM by Rovis Group
              (modified after loading)
=====
    
```

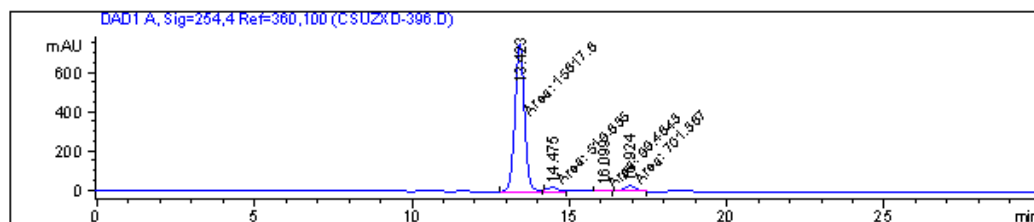

| Peak # | RetTime [min] | Type | Width [min] | Area [mAU*s] | Height [mAU] | Area %  |
|--------|---------------|------|-------------|--------------|--------------|---------|
| 1      | 13.423        | MM   | 0.3483      | 1.58178e4    | 756.93011    | 92.2951 |
| 2      | 14.475        | MM   | 0.3960      | 519.63495    | 21.87186     | 3.0320  |
| 3      | 16.099        | MM   | 0.3578      | 99.48429     | 4.63368      | 0.5805  |
| 4      | 16.924        | MM   | 0.4354      | 701.36731    | 26.84999     | 4.0924  |

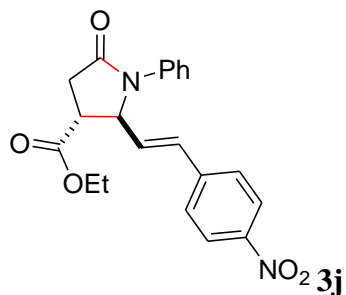

```

=====
Injection Date : 3/30/2011 6:22:20 PM          Seq. Line :    1
Sample Name    : CSUzxd-431                    Location  : Vial 2
Acq. Operator  : Rovis Group                    Inj       :    1
Acq. Instrument : Instrument 1                  Inj Volume: 10 µl
Different Inj Volume from Sequence !          Actual Inj Volume : 3 µl
Acq. Method    : D:\AGILENT HPLC\METHODS\XD-IA-80-20 LML 40MIN.M
Last changed   : 3/18/2011 9:51:10 AM by Rovis Group
Analysis Method : D:\AGILENT HPLC\METHODS\IA 97-3 LML 35MIN.M
Last changed   : 6/13/2011 9:09:38 PM by Rovis Group
                (modified after loading)
=====
    
```

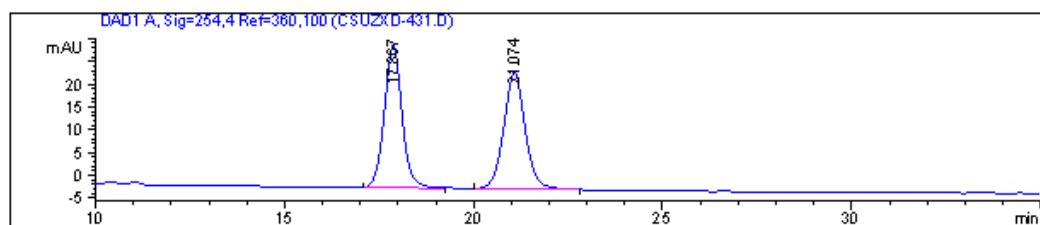

| Peak # | RetTime [min] | Type | Width [min] | Area [mAU*s] | Height [mAU] | Area %  |
|--------|---------------|------|-------------|--------------|--------------|---------|
| 1      | 17.867        | BB   | 0.5014      | 1023.28595   | 31.30357     | 50.2275 |
| 2      | 21.074        | BB   | 0.5974      | 1014.01544   | 25.64235     | 49.7725 |

```

=====
Injection Date : 3/30/2011 8:31:08 PM          Seq. Line :    1
Sample Name    : CSUzxd-428                    Location  : Vial 1
Acq. Operator  : Rovis Group                    Inj       :    1
Acq. Instrument : Instrument 1                  Inj Volume: 10 µl
Different Inj Volume from Sequence !          Actual Inj Volume : 6 µl
Acq. Method    : D:\AGILENT HPLC\METHODS\XD-IA-80-20 LML 40MIN.M
Last changed   : 3/18/2011 9:51:10 AM by Rovis Group
Analysis Method : D:\AGILENT HPLC\METHODS\IA 97-3 LML 35MIN.M
Last changed   : 6/13/2011 9:11:29 PM by Rovis Group
                (modified after loading)
=====
    
```

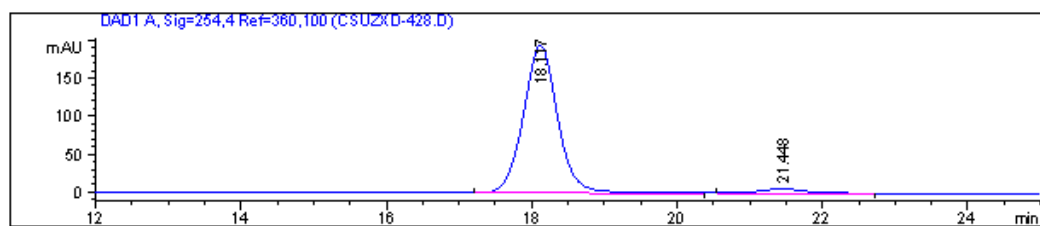

| Peak # | RetTime [min] | Type | Width [min] | Area [mAU*s] | Height [mAU] | Area %  |
|--------|---------------|------|-------------|--------------|--------------|---------|
| 1      | 18.117        | BB   | 0.5021      | 6363.49658   | 194.31239    | 96.3565 |
| 2      | 21.448        | BB   | 0.6438      | 240.62164    | 5.70832      | 3.6435  |

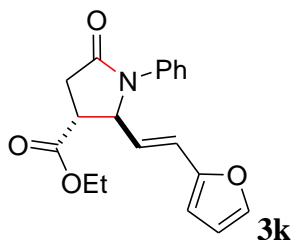

```

=====
Injection Date : 3/28/2011 11:57:37 AM      Seq. Line : 1
Sample Name    : CSUzxd-425-1              Location  : Vial 1
Acq. Operator  : Rovis Group                Inj      : 1
Acq. Instrument: Instrument 1              Inj Volume: 10 µl
Different Inj Volume from Sequence !      Actual Inj Volume: 3 µl
Acq. Method    : D:\AGILENT HPLC\METHODS\XD-IA-85-15 LML 25MIN.M
Last changed   : 3/28/2011 11:27:28 AM by Rovis Group
Analysis Method: D:\AGILENT HPLC\METHODS\IA 97-3 LML 35MIN.M
Last changed   : 6/13/2011 9:13:53 PM by Rovis Group
                (modified after loading)
=====
    
```

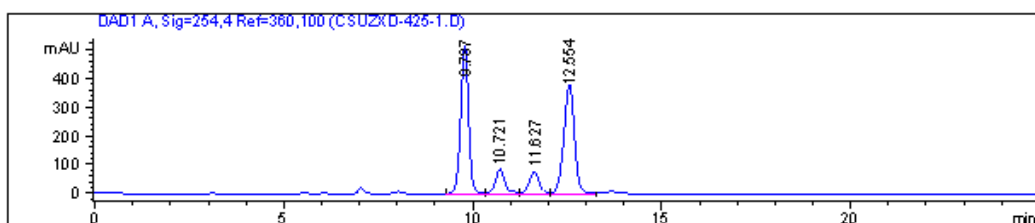

| Peak # | RetTime [min] | Type | Width [min] | Area [mAU*s] | Height [mAU] | Area %  |
|--------|---------------|------|-------------|--------------|--------------|---------|
| 1      | 9.787         | VV   | 0.2261      | 7458.71484   | 511.64975    | 41.8280 |
| 2      | 10.721        | VV   | 0.2704      | 1518.28455   | 85.83617     | 8.5144  |
| 3      | 11.627        | VV   | 0.2836      | 1445.84033   | 76.81924     | 8.1082  |
| 4      | 12.554        | VV   | 0.3003      | 7409.04883   | 378.59149    | 41.5494 |

```

=====
Injection Date : 3/28/2011 11:32:38 AM      Seq. Line : 1
Sample Name    : CSUzxd-422-2              Location  : Vial 6
Acq. Operator  : Rovis Group                Inj      : 1
Acq. Instrument: Instrument 1              Inj Volume: 10 µl
Different Inj Volume from Sequence !      Actual Inj Volume: 6 µl
Acq. Method    : D:\AGILENT HPLC\METHODS\XD-IA-85-15 LML 25MIN.M
Last changed   : 3/28/2011 11:27:28 AM by Rovis Group
Analysis Method: D:\AGILENT HPLC\METHODS\IA 97-3 LML 35MIN.M
Last changed   : 6/13/2011 9:13:53 PM by Rovis Group
                (modified after loading)
=====
    
```

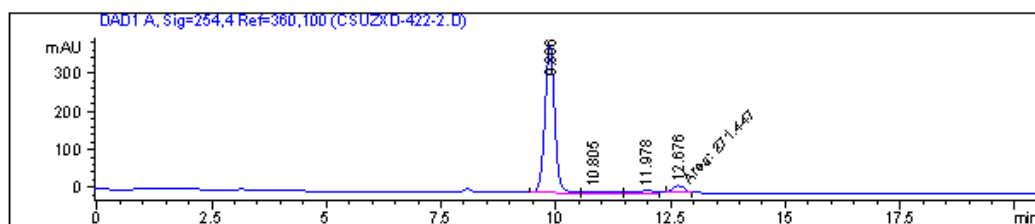

| Peak # | RetTime [min] | Type | Width [min] | Area [mAU*s] | Height [mAU] | Area %  |
|--------|---------------|------|-------------|--------------|--------------|---------|
| 1      | 9.866         | BV   | 0.2289      | 5731.96240   | 386.86972    | 92.2289 |
| 2      | 10.805        | VV   | 0.3652      | 80.71348     | 3.04590      | 1.2987  |
| 3      | 11.978        | VV   | 0.3284      | 130.80730    | 5.95292      | 2.1047  |
| 4      | 12.676        | MM   | 0.2813      | 271.44690    | 16.08284     | 4.3677  |

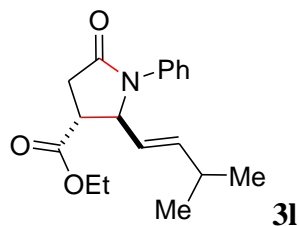

```

=====
Injection Date : 4/26/2011 1:25:57 PM      Seq. Line : 3
Sample Name    : CSUzxd-470-3              Location  : Vial 1
Acq. Operator  : Rovis Group                Inj      : 1
Acq. Instrument : Instrument 1              Inj Volume : 10 µl
Different Inj Volume from Sequence !      Actual Inj Volume : 6 µl
Acq. Method    : D:\AGILENT HPLC\METHODS\XD-IA-98-2 1ML 60 MIN.M
Last changed   : 4/7/2011 6:01:37 PM by Rovis Group
Analysis Method : D:\AGILENT HPLC\METHODS\XD ODH 80-20 1ML 30MIN.M
Last changed   : 6/13/2011 8:22:49 PM by Rovis Group
                (modified after loading)
=====
    
```

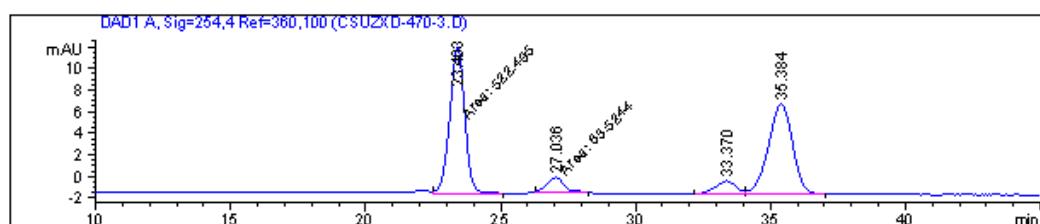

| Peak # | RetTime [min] | Type | Width [min] | Area [mAU*s] | Height [mAU] | Area %  |
|--------|---------------|------|-------------|--------------|--------------|---------|
| 1      | 23.403        | MM   | 0.6434      | 522.49506    | 13.53495     | 44.8728 |
| 2      | 27.036        | MM   | 0.7547      | 63.52445     | 1.40282      | 5.4556  |
| 3      | 33.370        | BV   | 0.8097      | 63.46736     | 1.18335      | 5.4507  |
| 4      | 35.384        | VB   | 0.9627      | 514.90356    | 8.31217      | 44.2209 |

```

=====
Injection Date : 4/27/2011 12:50:09 PM     Seq. Line : 1
Sample Name    : CSUzxd-475                Location  : Vial 1
Acq. Operator  : Rovis Group                Inj      : 1
Acq. Instrument : Instrument 1              Inj Volume : 10 µl
Different Inj Volume from Sequence !      Actual Inj Volume : 6 µl
Acq. Method    : D:\AGILENT HPLC\METHODS\XD-IA-98-2 1ML 60 MIN.M
Last changed   : 4/7/2011 6:01:37 PM by Rovis Group
Analysis Method : D:\AGILENT HPLC\METHODS\XD ODH 80-20 1ML 30MIN.M
Last changed   : 6/13/2011 8:22:49 PM by Rovis Group
                (modified after loading)
=====
    
```

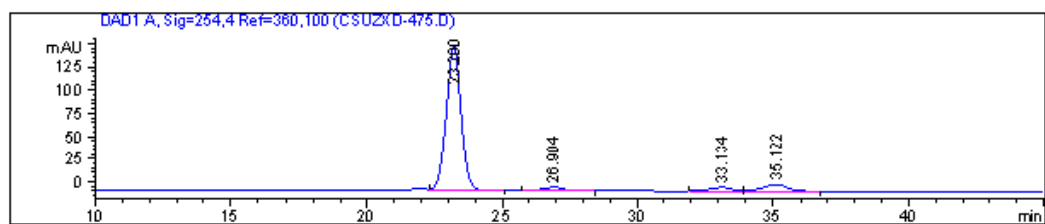

| Peak # | RetTime [min] | Type | Width [min] | Area [mAU*s] | Height [mAU] | Area %  |
|--------|---------------|------|-------------|--------------|--------------|---------|
| 1      | 23.200        | VB   | 0.5806      | 6024.03027   | 158.07256    | 87.5346 |
| 2      | 26.904        | BB   | 0.8556      | 216.80142    | 3.85824      | 3.1503  |
| 3      | 33.104        | BV   | 0.8467      | 212.23572    | 3.92621      | 3.0840  |
| 4      | 35.122        | VB   | 0.9027      | 428.81522    | 7.28517      | 6.2311  |

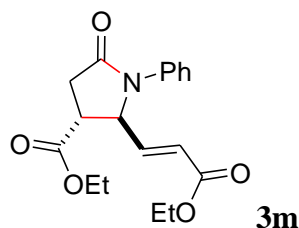

```

=====
Injection Date : 3/28/2011 12:20:06 AM      Seq. Line : 3
Sample Name    : CSUzxd-427                Location  : Vial 3
Acq. Operator  : Rovis Group                Inj      : 1
Acq. Instrument : Instrument 1              Inj Volume : 10 µl
Different Inj Volume from Sequence !      Actual Inj Volume : 6 µl
Acq. Method    : D:\AGILENT HPLC\METHODS\XD-IA-90-10 IML 30MIN.M
Last changed   : 7/16/2010 3:53:17 PM by Rovis Group
Analysis Method : D:\AGILENT HPLC\METHODS\IA 97-3 IML 35MIN.M
Last changed   : 6/13/2011 9:27:24 PM by Rovis Group
                (modified after loading)
=====
    
```

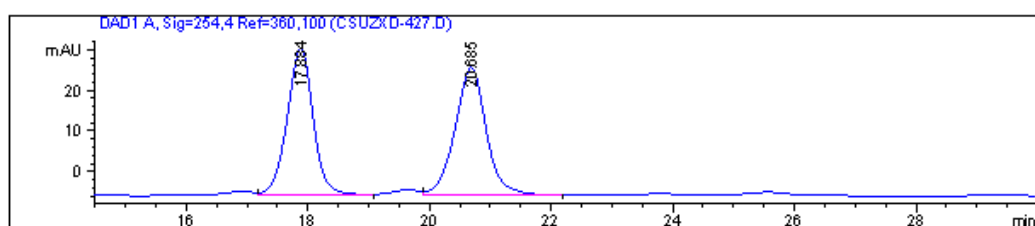

| Peak # | RetTime [min] | Type | Width [min] | Area [mAU*s] | Height [mAU] | Area %  |
|--------|---------------|------|-------------|--------------|--------------|---------|
| 1      | 17.884        | VB   | 0.4531      | 1082.12878   | 36.16209     | 49.1514 |
| 2      | 20.685        | VB   | 0.5379      | 1119.49487   | 31.25508     | 50.8486 |

```

=====
Injection Date : 3/25/2011 5:27:02 PM      Seq. Line : 1
Sample Name    : CSUzxd-423                Location  : Vial 7
Acq. Operator  : Rovis Group                Inj      : 1
Acq. Instrument : Instrument 1              Inj Volume : 10 µl
Different Inj Volume from Sequence !      Actual Inj Volume : 5 µl
Acq. Method    : D:\AGILENT HPLC\METHODS\XD-IA-90-10 IML 30MIN.M
Last changed   : 7/16/2010 3:53:17 PM by Rovis Group
Analysis Method : D:\AGILENT HPLC\METHODS\IA 97-3 IML 35MIN.M
Last changed   : 6/13/2011 9:27:24 PM by Rovis Group
                (modified after loading)
=====
    
```

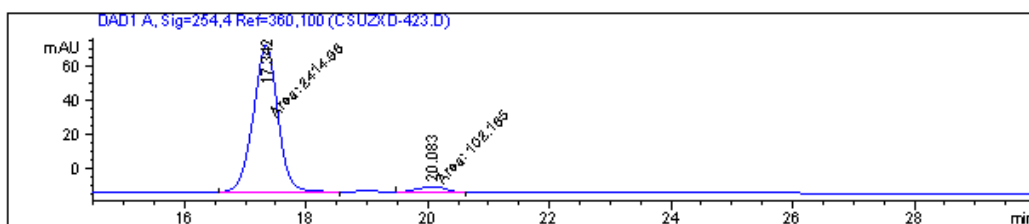

| Peak # | RetTime [min] | Type | Width [min] | Area [mAU*s] | Height [mAU] | Area %  |
|--------|---------------|------|-------------|--------------|--------------|---------|
| 1      | 17.342        | MM   | 0.4691      | 2414.97607   | 85.80814     | 95.9405 |
| 2      | 20.083        | MM   | 0.5065      | 102.18536    | 3.36251      | 4.0595  |

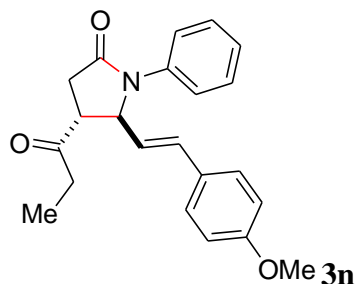

```

=====
Injection Date : 5/9/2011 10:43:18 AM      Seq. Line : 1
Sample Name    : CSUzxd-494                Location  : Vial 3
Acq. Operator  : Rovis Group               Inj      : 1
Acq. Instrument: Instrument 1              Inj Volume: 10 µl
Different Inj Volume from Sequence !      Actual Inj Volume : 5 µl
Acq. Method    : D:\AGILENT HPLC\METHODS\XD-IA-90-10 IML 40MIN.M
Last changed   : 5/9/2011 11:11:48 AM by Rovis Group
                (modified after loading)
Analysis Method: D:\AGILENT HPLC\METHODS\XD ODH 80-20 IML 30MIN.M
Last changed   : 6/13/2011 8:14:36 PM by Rovis Group
                (modified after loading)
=====
    
```

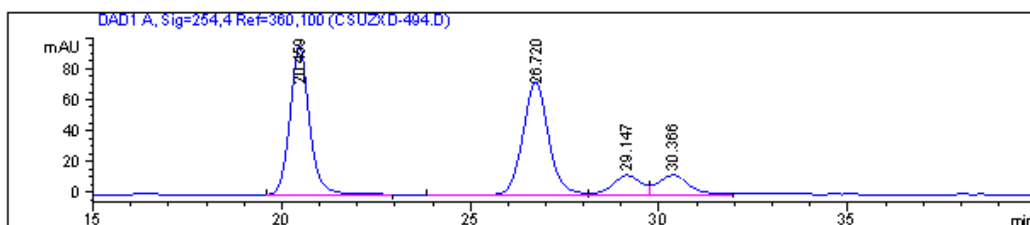

| Peak # | RetTime [min] | Type | Width [min] | Area [mAU*s] | Height [mAU] | Area %  |
|--------|---------------|------|-------------|--------------|--------------|---------|
| 1      | 20.459        | BB   | 0.5478      | 3572.74805   | 97.44020     | 42.2696 |
| 2      | 26.720        | BV   | 0.7169      | 3497.96265   | 73.27803     | 41.3848 |
| 3      | 29.147        | VV   | 0.7788      | 659.21631    | 12.59132     | 7.7993  |
| 4      | 30.366        | VV   | 0.8581      | 722.36108    | 12.65187     | 8.5463  |

```

=====
Injection Date : 5/9/2011 7:33:28 PM      Seq. Line : 2
Sample Name    : CSUzxd-496                Location  : Vial 4
Acq. Operator  : Rovis Group               Inj      : 1
Acq. Instrument: Instrument 1              Inj Volume: 10 µl
Different Inj Volume from Sequence !      Actual Inj Volume : 4 µl
Acq. Method    : D:\AGILENT HPLC\METHODS\XD-IA-90-10 IML 40MIN.M
Last changed   : 10/9/2010 6:21:21 PM by Rovis Group
Analysis Method: D:\AGILENT HPLC\METHODS\XD ODH 80-20 IML 30MIN.M
Last changed   : 6/13/2011 8:14:36 PM by Rovis Group
                (modified after loading)
=====
    
```

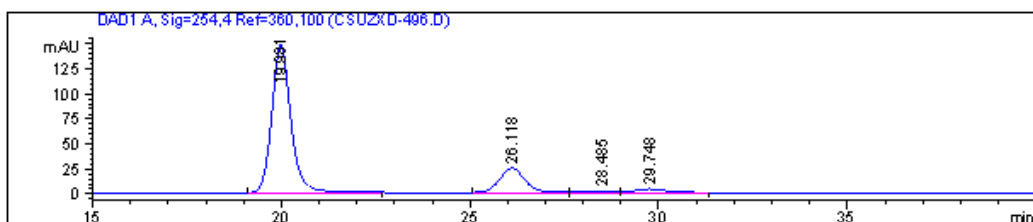

| Peak # | RetTime [min] | Type | Width [min] | Area [mAU*s] | Height [mAU] | Area %  |
|--------|---------------|------|-------------|--------------|--------------|---------|
| 1      | 19.981        | BB   | 0.5308      | 5207.87695   | 147.90758    | 78.4536 |
| 2      | 26.118        | BV   | 0.7067      | 1134.47778   | 24.57097     | 17.0902 |
| 3      | 28.485        | VV   | 0.7453      | 90.07835     | 1.74788      | 1.3570  |
| 4      | 29.748        | VB   | 0.8629      | 205.73003    | 3.57735      | 3.0992  |



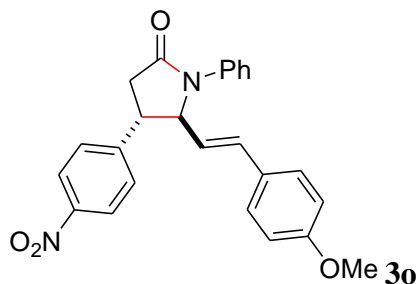

```

=====
Injection Date : 4/19/2011 2:33:17 PM          Seq. Line : 2
Sample Name   : CSUzxd-461-1                  Location  : Vial 3
Acq. Operator : Rovis Group                    Inj      : 1
Acq. Instrument : Instrument 1                 Inj Volume : 10 µl
Different Inj Volume from Sequence !          Actual Inj Volume : 6 µl
Acq. Method   : D:\AGILENT HPLC\METHODS\XD-IA-90-10 IML 40MIN.M
Last changed  : 4/19/2011 3:24:24 PM by Rovis Group
              (modified after loading)
Analysis Method : D:\AGILENT HPLC\METHODS\XD ODH 80-20 IML 30MIN.M
Last changed  : 6/13/2011 8:31:24 PM by Rovis Group
              (modified after loading)
=====
    
```

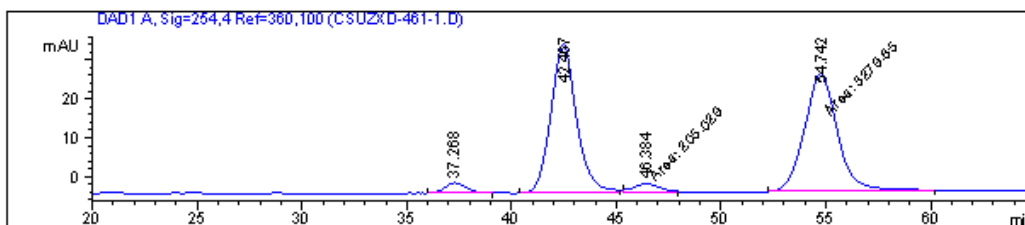

| Peak # | RetTime [min] | Type | Width [min] | Area [mAU*s] | Height [mAU] | Area %  |
|--------|---------------|------|-------------|--------------|--------------|---------|
| 1      | 37.268        | BB   | 1.0860      | 195.02414    | 2.66417      | 2.8031  |
| 2      | 42.467        | BV   | 1.2450      | 3277.79150   | 38.35566     | 47.1117 |
| 3      | 46.384        | MM   | 1.5421      | 205.02927    | 2.21593      | 2.9469  |
| 4      | 54.742        | MM   | 1.8068      | 3279.64526   | 30.25341     | 47.1383 |

```

=====
Injection Date : 4/19/2011 3:44:20 PM          Seq. Line : 3
Sample Name   : CSUzxd-455-2                  Location  : Vial 4
Acq. Operator : Rovis Group                    Inj      : 1
Acq. Instrument : Instrument 1                 Inj Volume : 10 µl
Different Inj Volume from Sequence !          Actual Inj Volume : 3 µl
Acq. Method   : D:\AGILENT HPLC\METHODS\XD-IA-90-10 IML 65MIN.M
Last changed  : 4/19/2011 3:29:29 PM by Rovis Group
Analysis Method : D:\AGILENT HPLC\METHODS\XD ODH 80-20 IML 30MIN.M
Last changed  : 6/13/2011 8:31:24 PM by Rovis Group
              (modified after loading)
=====
    
```

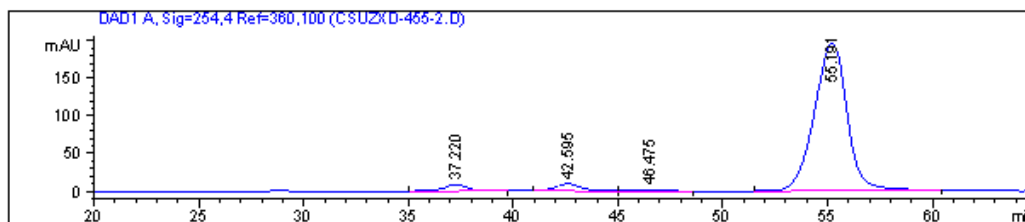

| Peak # | RetTime [min] | Type | Width [min] | Area [mAU*s] | Height [mAU] | Area %  |
|--------|---------------|------|-------------|--------------|--------------|---------|
| 1      | 37.220        | BB   | 1.2305      | 692.66302    | 8.43110      | 2.9875  |
| 2      | 42.595        | BB   | 1.2901      | 823.07715    | 9.58276      | 3.5500  |
| 3      | 46.475        | BV   | 1.1780      | 163.94576    | 1.72933      | 0.7071  |
| 4      | 55.191        | BB   | 1.6106      | 2.15053e4    | 196.84256    | 92.7553 |

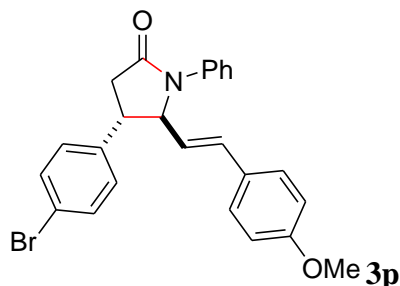

```

=====
Injection Date : 4/30/2011 8:55:35 PM      Seq. Line : 1
Sample Name   : CSuzxd-484-6              Location  : Vial 1
Acq. Operator : Rovis Group                Inj      : 1
Acq. Instrument : Instrument 1             Inj Volume : 10 ul
Different Inj Volume from Sequence !      Actual Inj Volume : 5 ul
Acq. Method   : D:\AGILENT HPLC\METHODS\XD IC 50-50 IML 40 MIN.M
Last changed  : 4/30/2011 8:50:32 PM by Rovis Group
Analysis Method : D:\AGILENT HPLC\METHODS\IA 99-1 IML 35MIN.M
Last changed  : 6/10/2011 11:16:13 PM by Rovis Group
              (modified after loading)
=====
    
```

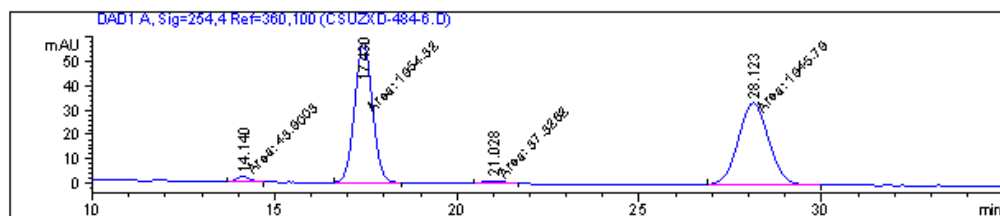

Signal 1: DAD1 A, Sig=254,4 Ref=360,100

| Peak # | RetTime [min] | Type | Width [min] | Area [mAU*s] | Height [mAU] | Area %  |
|--------|---------------|------|-------------|--------------|--------------|---------|
| 1      | 14.140        | MM   | 0.3974      | 43.90025     | 1.84128      | 1.1027  |
| 2      | 17.430        | MM   | 0.5684      | 1954.32080   | 57.30454     | 49.0870 |
| 3      | 21.028        | MM   | 0.5932      | 37.32821     | 1.04873      | 0.9376  |
| 4      | 28.123        | MM   | 0.9671      | 1945.79114   | 33.53290     | 48.8728 |

```

=====
Injection Date : 4/30/2011 9:38:32 PM      Seq. Line : 1
Sample Name   : CSUZxd-479-1              Location  : Vial 3
Acq. Operator : Rovis Group                Inj      : 1
Acq. Instrument : Instrument 1             Inj Volume : 10 ul
Different Inj Volume from Sequence !      Actual Inj Volume : 4 ul
Acq. Method   : D:\AGILENT HPLC\METHODS\XD IC 50-50 IML 40 MIN.M
Last changed  : 4/30/2011 8:50:32 PM by Rovis Group
Analysis Method : D:\AGILENT HPLC\METHODS\IA 99-1 IML 35MIN.M
Last changed  : 6/10/2011 11:21:04 PM by Rovis Group
              (modified after loading)
=====
    
```

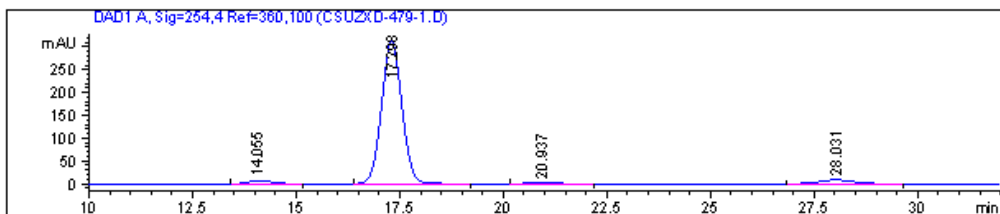

Signal 1: DAD1 A, Sig=254,4 Ref=360,100

| Peak # | RetTime [min] | Type | Width [min] | Area [mAU*s] | Height [mAU] | Area %  |
|--------|---------------|------|-------------|--------------|--------------|---------|
| 1      | 14.055        | BB   | 0.5571      | 251.51779    | 6.59292      | 2.1839  |
| 2      | 17.298        | BB   | 0.5258      | 1.06925e4    | 313.58862    | 92.8415 |
| 3      | 20.937        | BB   | 0.7252      | 88.70139     | 1.85717      | 0.7702  |
| 4      | 28.031        | BB   | 0.9115      | 484.21878    | 8.41345      | 4.2044  |

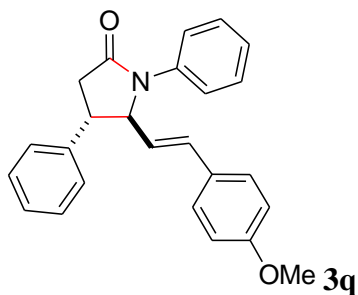

```

=====
Injection Date : 4/30/2011 10:22:11 PM      Seq. Line : 1
Sample Name    : CSUzxd-485-1              Location  : Vial 2
Acq. Operator  : Rovis Group                Inj       : 1
Acq. Instrument : Instrument 1              Inj Volume : 10 µl
Different Inj Volume from Sequence !      Actual Inj Volume : 4 µl
Acq. Method    : D:\AGILENT HPLC\METHODS\XD IC 50-50 IML 40 MIN.M
Last changed   : 4/30/2011 8:50:32 PM by Rovis Group
Analysis Method : D:\AGILENT HPLC\METHODS\IA 99-1 IML 35MIN.M
Last changed   : 6/11/2011 11:07:26 AM by Rovis Group
                (modified after loading)
=====
    
```

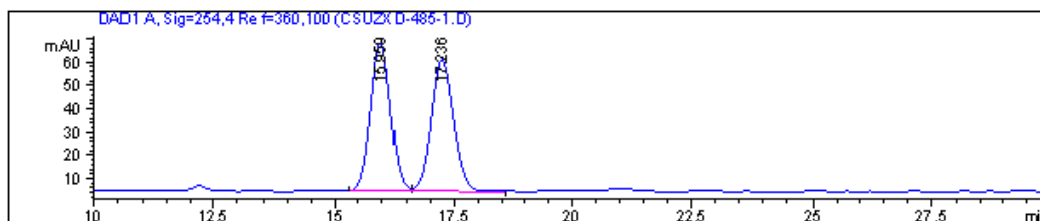

| Peak # | RetTime [min] | Type | Width [min] | Area [mAU*s] | Height [mAU] | Area %  |
|--------|---------------|------|-------------|--------------|--------------|---------|
| 1      | 15.959        | BV   | 0.4529      | 1853.68237   | 63.43568     | 49.8904 |
| 2      | 17.236        | VB   | 0.5125      | 1861.82971   | 56.48634     | 50.1096 |

```

=====
Injection Date : 5/2/2011 12:05:18 PM      Seq. Line : 2
Sample Name    : CSUzxd-480              Location  : Vial 4
Acq. Operator  : Rovis Group                Inj       : 1
Acq. Instrument : Instrument 1              Inj Volume : 10 µl
Different Inj Volume from Sequence !      Actual Inj Volume : 6 µl
Acq. Method    : D:\AGILENT HPLC\METHODS\XD IC 50-50 IML 40 MIN.M
Last changed   : 5/2/2011 12:11:56 PM by Rovis Group
                (modified after loading)
Analysis Method : D:\AGILENT HPLC\METHODS\IA 99-1 IML 35MIN.M
Last changed   : 6/11/2011 11:11:23 AM by Rovis Group
                (modified after loading)
=====
    
```

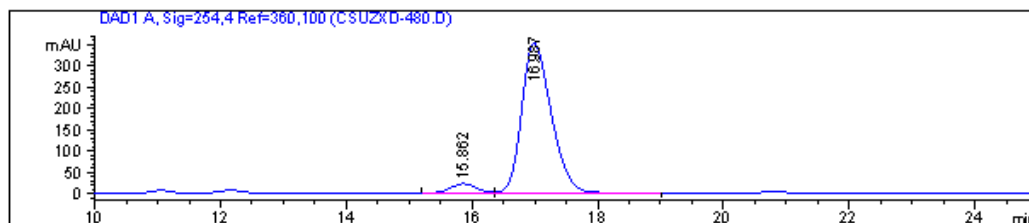

| Peak # | RetTime [min] | Type | Width [min] | Area [mAU*s] | Height [mAU] | Area %  |
|--------|---------------|------|-------------|--------------|--------------|---------|
| 1      | 15.862        | BV   | 0.4426      | 598.80872    | 21.13406     | 4.9966  |
| 2      | 16.987        | VB   | 0.4990      | 1.13856e4    | 350.45380    | 95.0034 |

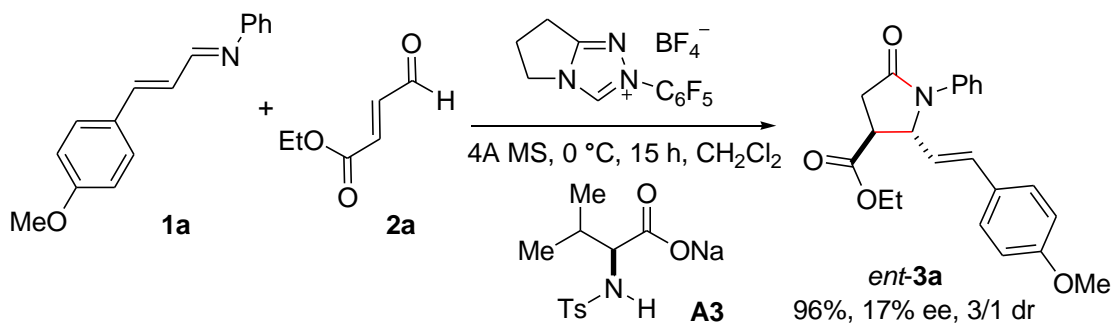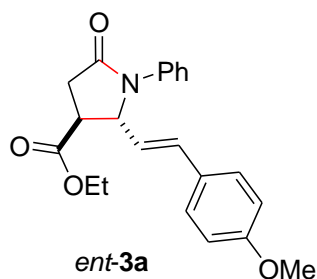

```

=====
Injection Date   : 5/23/2011 11:43:25 AM      Seq. Line :    1
Sample Name     : CSUzxd-502                 Location  : Vial 1
Acq. Operator   : Rovis Group                 Inj       :    1
Acq. Instrument : Instrument 1                Inj Volume: 10 µl
Different Inj Volume from Sequence ! Actual Inj Volume : 4 µl
Acq. Method     : D:\AGILENT HPLC\METHODS\XD-IA-90-10 1ML 30MIN.M
Last changed    : 5/23/2011 11:39:42 AM by Rovis Group
                  (modified after loading)
Analysis Method : D:\AGILENT HPLC\METHODS\IA 97-3 1ML 60MIN.M
Last changed    : 7/10/2011 3:42:12 PM by Rovis Group
                  (modified after loading)
=====
    
```

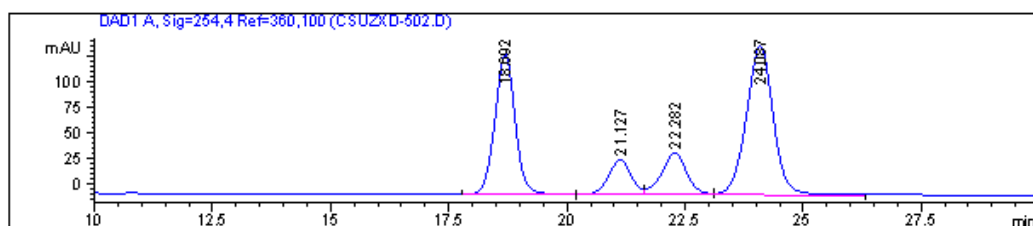

| Peak # | RetTime [min] | Type | Width [min] | Area [mAU*s] | Height [mAU] | Area %  |
|--------|---------------|------|-------------|--------------|--------------|---------|
| 1      | 18.692        | BV   | 0.4606      | 4063.42578   | 136.00938    | 32.5937 |
| 2      | 21.127        | VV   | 0.5159      | 1143.66064   | 33.70366     | 9.1736  |
| 3      | 22.282        | VV   | 0.5649      | 1510.32776   | 40.33284     | 12.1147 |
| 4      | 24.087        | VV   | 0.6085      | 5749.48193   | 144.42230    | 46.1180 |
